# Supplementary material for: Genome-Wide Analyses Reveal Genetic Convergence of Prolificacy between Goats and Sheep
Source: MDPI journal article supplement (doi:10.3390/genes12040480), 2021-03-26
Supplement: s1 [file s1]

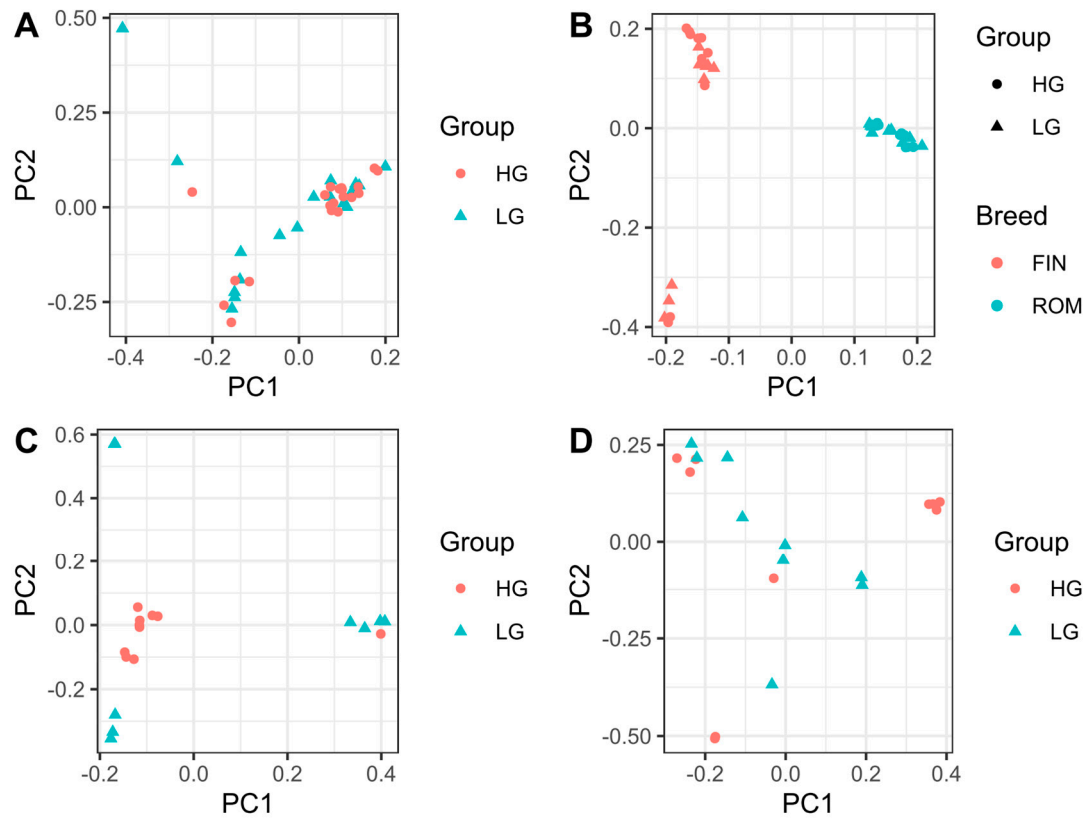

**Figure S1.** Principal component analysis of goats and sheep. (A) Yunshang black goats. (B) Finnsheep (FIN) and Romanov (ROM) sheep. (C) Finnsheep. (D) Romanov sheep. HG: high-yield group; LG: low-yield group.

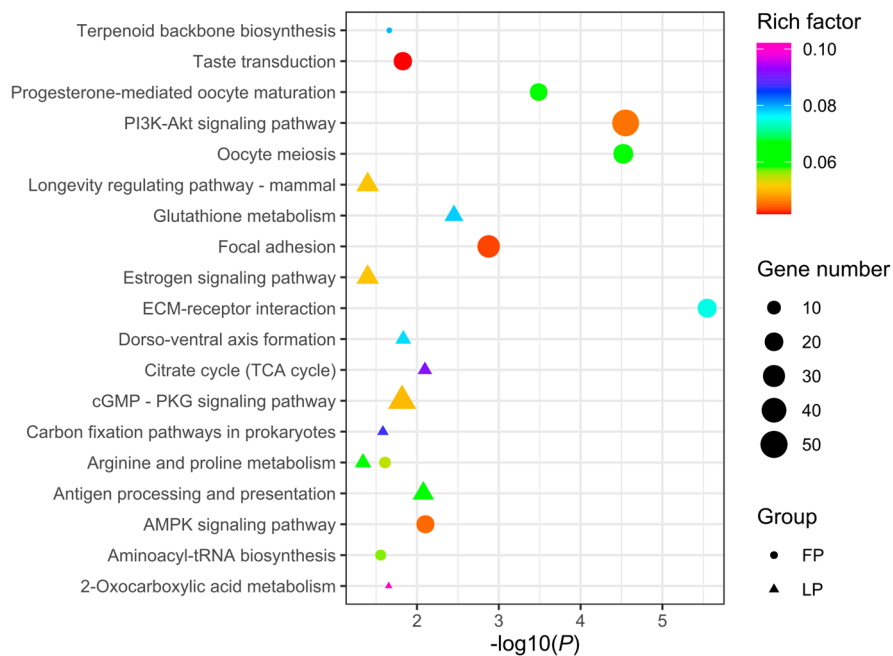

**Figure S2.** Top 10 KEGG terms of differentially expressed genes from luteal phase (LP) and follicular phase (FP) in Yunshang black goats.
