# Supplementary material for: Genome-Wide Analyses Reveal Genetic Convergence of Prolificacy between Goats and Sheep
Source: Genes (Basel). 2021 Mar 26;12(4):480. doi: 10.3390/genes12040480 (PMC8065816; doi:10.3390/genes12040480)
Supplement: Supplementary file 1 [file genes-12-00480-s001.zip › Additional Table S1.xlsx]

## Sheet: YSD
id	name	group	ls1	ls2	ls3	ls4	ls5	average
m01	M01	LG	1	1	NA	NA	NA	1
m02	M02	LG	2	1	NA	NA	NA	1.5
m03	M03	LG	2	1	1	1	NA	1.25
m04	M04	LG	2	1	1	1	NA	1.25
m05	M05	LG	1	1	2	NA	NA	1.33333
m06	M06	LG	2	1	1	1	NA	1.25
m07	M07	LG	1	1	NA	NA	NA	1
m08	M08	LG	2	1	NA	NA	NA	1.5
m09	M09	LG	2	1	NA	NA	NA	1.5
m10	M10	LG	2	1	NA	NA	NA	1.5
m11	M11	LG	1	2	1	NA	NA	1.33333
m12	M12	LG	2	1	NA	NA	NA	1.5
m15	M13	LG	1	2	NA	NA	NA	1.5
m16	M14	LG	1	2	NA	NA	NA	1.5
m17	M15	LG	1	2	NA	NA	NA	1.5
m18	M16	LG	1	1	2	NA	NA	1.33333
m19	M17	LG	1	1	NA	NA	NA	1
m20	M18	LG	1	1	2	NA	NA	1.33333
m21	M19	LG	1	2	1	NA	NA	1.33333
m22	M20	LG	1	1	NA	NA	NA	1
p01	P01	HG	2	3	NA	NA	NA	2.5
p02	P02	HG	3	2	NA	NA	NA	2.5
p03	P03	HG	3	3	3	NA	NA	3
p04	P04	HG	3	3	4	2	2	2.8
p05	P05	HG	4	4	NA	NA	NA	4
p06	P06	HG	4	3	2	3	2	2.8
p07	P07	HG	3	3	4	NA	NA	3.33333
p08	P08	HG	4	3	3	NA	NA	3.33333
p09	P09	HG	3	3	3	3	NA	3
p10	P10	HG	2	4	3	NA	NA	3
p11	P11	HG	4	3	3	NA	NA	3.33333
p13	P12	HG	3	3	3	3	NA	3
p14	P13	HG	2	3	3	3	3	2.8
p15	P14	HG	2	3	3	3	NA	2.75
p16	P15	HG	2	4	4	NA	NA	3.33333
p17	P16	HG	3	3	3	NA	NA	3
p18	P17	HG	3	2	4	NA	NA	3
p20	P18	HG	2	2	3	NA	NA	2.33333
p22	P19	HG	2	3	NA	NA	NA	2.5
p23	P20	HG	3	3	NA	NA	NA	3

## Sheet: YSR
phase	group	id	body weight (kg)	litter size 1	litter size 2	average
LP	LG	711010	56	1	2	1.5
LP	LG	711012	60	1	2	1.5
LP	LG	603222	60.7	2	2	2
LP	LG	706612	53.7	2	2	2
LP	LG	660214	54	2	2	2
FP	LG	501176	62.7	2	1	1.5
FP	LG	601128	56	2	2	2
FP	LG	712004	51.5	1	2	1.5
FP	LG	708032	50.2	2	2	2
FP	LG	711032	62	1	2	1.5
LP	HG	501178	68.5	3	3	3
LP	HG	501002	62.1	4	3	3.5
LP	HG	660210	50	5	3	4
LP	HG	660018	49.1	3	3	3
LP	HG	501210	71.6	4	3	3.5
FP	HG	612078	54	3	3	3
FP	HG	601094	59	3	3	3
FP	HG	601078	48.3	3	4	3.5
FP	HG	L6064020	56.7	3	3	3
FP	HG	L6053754	41.7	4	3	3.5

## Sheet: FIN
no	group	ls1	ls2	ls3	ls4	ls5	ls6	ls7	ls8	average
FINN204	LG	1	1	NA	NA	NA	NA	NA	NA	1
FINN211	LG	1	2	1	NA	NA	NA	NA	NA	1.33333
FINN219	LG	1	1	2	2	NA	NA	NA	NA	1.5
FINN282	LG	2	2	2	1	2	1	NA	NA	1.66667
FINN203	LG	3	2	1	1	NA	NA	NA	NA	1.75
FINN284	LG	3	2	3	1	1	1	NA	NA	1.83333
FINN217	LG	2	1	2	1	2	2	3	NA	1.85714
FINN249	LG	1	2	3	NA	NA	NA	NA	NA	2
FINN281	LG	2	2	2	3	1	NA	NA	NA	2
FINN292	HG	3	3	2	4	3	5	3	NA	3.28571
FINN291	HG	3	4	4	4	3	NA	NA	NA	3.6
FINN290	HG	3	3	3	2	6	3	NA	NA	3.33333
FINN289	HG	3	3	5	3	3	NA	NA	NA	3.4
FINN288	HG	3	2	3	4	5	4	4	2	3.375
FINN287	HG	5	4	4	4	4	4	NA	NA	4.16667
FINN285	HG	3	3	5	3	3	4	NA	NA	3.5
FINN277	HG	4	4	5	5	NA	NA	NA	NA	4.5
FINN265	HG	4	3	NA	NA	NA	NA	NA	NA	3.5
FINN261	HG	5	4	2	2	NA	NA	NA	NA	3.25

## Sheet: ROM
no	group	ls1	ls2	ls3	ls4	ls5	ls6	average
RO16	LG	1	NA	NA	NA	NA	NA	1
RO22	LG	2	1	1	NA	NA	NA	1.33333
RO13	LG	2	1	1	2	NA	NA	1.5
RO27	LG	1	1	2	2	NA	NA	1.5
RO36	LG	1	2	NA	NA	NA	NA	1.5
RO72	LG	2	2	2	1	2	1	1.66667
RO8	LG	1	2	2	NA	NA	NA	1.66667
RO68	LG	2	1	2	2	2	NA	1.8
RO46	LG	1	2	2	2	2	NA	1.8
RO28	HG	2	4	3	NA	NA	NA	3
RO29	HG	2	3	3	3	4	NA	3
RO32	HG	2	3	4	4	2	NA	3
RO69	HG	2	3	3	3	4	NA	3
RO79	HG	3	3	NA	NA	NA	NA	3
RO9	HG	3	3	3	NA	NA	NA	3
RO25	HG	3	4	3	NA	NA	NA	3.33333
RO39	HG	3	4	3	NA	NA	NA	3.33333
RO41	HG	4	2	4	NA	NA	NA	3.33333
RO74	HG	3	4	3	NA	NA	NA	3.33333

## Sheet: STH
id	group	ls1	ls2	ls3	average
4177	HG	3	3	3	3
4775	HG	2	3	3	2.66667
211	HG	3	3	3	3
265	HG	2	3	3	2.66667
446	HG	3	3	3	3
12	HG	3	3	3	3
4053	LG	1	1	1	1
4205	LG	1	1	1	1
3048	LG	1	1	1	1
4298	LG	1	1	1	1
3390	LG	1	1	1	1
4282	LG	1	1	1	1
