# Supplementary material for: Genome-Wide Analyses Reveal Genetic Convergence of Prolificacy between Goats and Sheep
Source: Genes (Basel). 2021 Mar 26;12(4):480. doi: 10.3390/genes12040480 (PMC8065816; doi:10.3390/genes12040480)
Supplement: Supplementary file 1 [file genes-12-00480-s001.zip › Additional Table S2-S11.xlsx]

## Sheet: Table S2
Table S2. Primer sequences of HS3ST2.
Loci	Classes	Sequence (5’-3’)
g.20423876C>T	Forward	ACGTTGGATGCCATGGAGCCATGGCCTATA
	Reverse	ACGTTGGATGAGCGTGAAAGCGAAGAGCAG
	Extend	CCACCCTCCGCGGCTGAG
g.20424095G>T	Forward	ACGTTGGATGCAGAAACTTCTCCAGGAGTC
	Reverse	ACGTTGGATGAGTGGTTGGACCCAGAGAG
	Extend	GAAGCGGGCGCGCTGGGAG
g.20422882G>C	Forward	ACGTTGGATGACCCGACACGACGTCCGATT
	Reverse	ACGTTGGATGATAGAAACACCCACAGGGAC
	Extend	CCCTTTTCCCCCAGC

## Sheet: Table S3
Table S3. Positively selected genes identified by Fst.
Chr	Start	End	Fst	Gene
NC_030832.1	20350001	20450000	0.126114	HS3ST2
NC_030814.1	108350001	108450000	0.121959	.
NC_030832.1	18600001	18700000	0.120647	.
NC_030814.1	108300001	108400000	0.120035	.
NC_030812.1	22850001	22950000	0.109605	.
NC_030812.1	66600001	66700000	0.108092	TXNRD1,EID3,LOC106502121
NC_030819.1	50550001	50650000	0.107422	ZMYM2,GJA3
NC_030813.1	67550001	67650000	0.105905	SLAIN2
NC_030818.1	71250001	71350000	0.103051	.
NC_030813.1	35550001	35650000	0.10268	.
NC_030816.1	91450001	91550000	0.102558	FAM120B,PSMB1,TBP,PDCD2
NC_030816.1	91500001	91600000	0.102167	PSMB1,TBP,PDCD2
NC_030812.1	66550001	66650000	0.100839	TXNRD1,TRNAA-UGC,EID3
NC_030818.1	71300001	71400000	0.0996472	TRNAC-GCA
NC_030832.1	27450001	27550000	0.0990885	SEPT14,LOC102183030,TRNAA-AGC,GBAS
NC_030821.1	91150001	91250000	0.0966168	.
NC_030809.1	50750001	50850000	0.094921	HECW2
NC_030816.1	91300001	91400000	0.092893	DLL1,LOC108636758,FAM120B
NC_030832.1	19100001	19200000	0.0922789	LOC108633910
NC_030809.1	64900001	65000000	0.0919701	DBI,C2H2orf76,TRNAC-GCA
NC_030820.1	70000001	70100000	0.0909576	.
NC_030832.1	27500001	27600000	0.0905667	LOC102183030,TRNAA-AGC,GBAS,PSPH,CCT6A
NC_030812.1	5600001	5700000	0.0900912	BBS10,OSBPL8
NC_030811.1	43450001	43550000	0.087527	PPIA,LOC106502044,PURB,MYO1G
NC_030809.1	64850001	64950000	0.0871838	SCTR,TMEM37,DBI,C2H2orf76
NC_030813.1	35600001	35700000	0.0863034	.
NC_030819.1	86000001	86100000	0.0855246	.
NC_030814.1	108400001	108500000	0.0853533	.
NC_030818.1	19500001	19600000	0.0853416	CEBPZ,NDUFAF7,PRKD3
NC_030819.1	87250001	87350000	0.0846241	.
NC_030813.1	59300001	59400000	0.0841293	LOC108636219,LOC102172700,UBE2K
NC_030809.1	50800001	50900000	0.0837824	.
NC_030832.1	20300001	20400000	0.0835777	.
NC_030832.1	18650001	18750000	0.08226	.
NC_030818.1	19850001	19950000	0.0817163	CDC42EP3
NC_030821.1	91200001	91300000	0.0817128	FAM135A,SDHAF4
NC_030817.1	71950001	72050000	0.081416	DPH6
NC_030812.1	5550001	5650000	0.0809128	LOC102180999,BBS10,OSBPL8
NC_030832.1	19050001	19150000	0.0808756	.
NC_030809.1	7200001	7300000	0.0804912	IFNLR1
NC_030816.1	91550001	91650000	0.0801558	PDCD2
NC_030824.1	56750001	56850000	0.0801385	LOC106503014
NC_030818.1	19900001	20000000	0.0792139	CDC42EP3
NC_030812.1	66650001	66750000	0.0789315	TXNRD1,LOC106502121,CHST11
NC_030832.1	18950001	19050000	0.0787912	LOC106503575,LOC102180560
NC_030816.1	91400001	91500000	0.0783028	FAM120B
NC_030832.1	19000001	19100000	0.0782169	LOC102180560
NC_030811.1	43500001	43600000	0.0781779	PURB,MYO1G,LOC102182195,CCM2
NC_030832.1	28400001	28500000	0.0781769	.
NC_030836.1	46150001	46250000	0.0780409	B4GALNT4,LOC102176955,AP2A2,MUC6
NC_030832.1	19500001	19600000	0.0778182	LOC102180820,LOC100861263
NC_030818.1	21300001	21400000	0.0777081	CDKL4
NC_030817.1	2700001	2800000	0.0769245	TTC8,EML5
NC_030836.1	46200001	46300000	0.076649	AP2A2,MUC6
NC_030818.1	18350001	18450000	0.0764359	.
NC_030832.1	21000001	21100000	0.0763616	COG7
NC_030819.1	50600001	50700000	0.07613	ZMYM2,GJA3,GJB2,LOC108637298,GJB6
NC_030817.1	44300001	44400000	0.0760266	.
NC_030826.1	7400001	7500000	0.0759525	SCPEP1
NC_030832.1	20950001	21050000	0.0757697	SCNN1B,COG7
NC_030832.1	19450001	19550000	0.0756797	.
NC_030832.1	20400001	20500000	0.0756375	HS3ST2
NC_030817.1	2800001	2900000	0.0756371	.
NC_030810.1	61550001	61650000	0.075548	LOC102191009,RPF1,GNG5,SPATA1
NC_030817.1	82700001	82800000	0.0752893	.
NC_030819.1	86050001	86150000	0.0746893	.
NC_030810.1	61500001	61600000	0.0746664	LOC102168228,TRNAG-CCC,DNASE2B,LOC102191009,RPF1
NC_030825.1	51900001	52000000	0.0743874	CIC,ERF,GSK3A,ZNF526,DEDD2,POU2F2
NC_030819.1	78300001	78400000	0.0742606	.
NC_030817.1	29950001	30050000	0.0740533	SLC38A6
NC_030813.1	10100001	10200000	0.0739343	.
NC_030834.1	20000001	20100000	0.0736222	.
NC_030810.1	112050001	112150000	0.0736076	LOC102184859,TRNAG-GCC,HSPA6,TRNAL-CAG,TRNAG-UCC,TRNAD-GUC,TRNAN-GUU,LOC102185698
NC_030809.1	50250001	50350000	0.0732924	.
NC_030817.1	82650001	82750000	0.0731968	.
NC_030811.1	93200001	93300000	0.0726485	.
NC_030812.1	66500001	66600000	0.0721738	MIR2284E,TXNRD1,TRNAA-UGC
NC_030812.1	67500001	67600000	0.0718751	C5H12orf75
NC_030818.1	94600001	94700000	0.0715379	LHX2
NC_030831.1	37200001	37300000	0.0713297	METTL4,NDC80,TRNAE-UUC
NC_030818.1	17050001	17150000	0.0711986	.
NC_030810.1	112250001	112350000	0.0708668	FCRLA,FCRLB,DUSP12,ATF6
NC_030813.1	67600001	67700000	0.0706905	SLAIN2
NC_030825.1	51850001	51950000	0.0706715	MEGF8,TMEM145,PRR19,PAFAH1B3,CIC,ERF,GSK3A,ZNF526,DEDD2
NC_030836.1	36150001	36250000	0.0705931	SNX19
NC_030813.1	35150001	35250000	0.0705721	MMRN1
NC_030828.1	35350001	35450000	0.0699584	.
NC_030811.1	51350001	51450000	0.0699382	HOXA11,HOXA13,EVX1
NC_030809.1	7850001	7950000	0.0697215	RUNX3
NC_030832.1	18550001	18650000	0.0695091	LYRM1,DNAH3
NC_030814.1	10250001	10350000	0.0693214	LOC108636451
NC_030827.1	38050001	38150000	0.0691823	SKP2,LMBRD2,LOC102173506
NC_030813.1	59250001	59350000	0.0691185	SMIM14,LOC108636219,LOC102172700
NC_030814.1	10200001	10300000	0.0690534	.
NC_030825.1	51950001	52050000	0.0687826	DEDD2,POU2F2
NC_030808.1	120900001	121000000	0.0684393	LOC106502391
NC_030824.1	66800001	66900000	0.0684216	KIAA0922,TRNAC-GCA,TLR2,RNF175
NC_030808.1	122850001	122950000	0.0684019	.
NC_030816.1	91350001	91450000	0.0683754	DLL1,LOC108636758,FAM120B
NC_030814.1	12650001	12750000	0.0683546	.
NC_030816.1	49250001	49350000	0.0681258	.
NC_030816.1	44550001	44650000	0.0680955	.
NC_030818.1	17000001	17100000	0.0677323	.
NC_030826.1	45700001	45800000	0.0675284	.
NC_030809.1	88400001	88500000	0.0674147	MBD5
NC_030821.1	91250001	91350000	0.0673607	FAM135A,SDHAF4
NC_030820.1	78450001	78550000	0.0672578	KCNG1,LOC106502801
NC_030827.1	15100001	15200000	0.0670917	.
NC_030812.1	22900001	23000000	0.067086	NUDT4,UBE2N
NC_030832.1	18200001	18300000	0.0669554	ERV3-1,ACSM4
NC_030817.1	30000001	30100000	0.0669204	SLC38A6,TRMT5,MNAT1
NC_030810.1	112100001	112200000	0.0669164	LOC102184859,TRNAG-GCC,HSPA6,TRNAL-CAG,TRNAG-UCC,TRNAD-GUC,TRNAN-GUU,LOC102185698,LOC108635605
NC_030811.1	44400001	44500000	0.0666519	.
NC_030825.1	19700001	19800000	0.0664682	.
NC_030828.1	30400001	30500000	0.0662123	IREB2,HYKK
NC_030832.1	28450001	28550000	0.0662035	CALN1
NC_030813.1	10000001	10100000	0.0661751	.
NC_030822.1	39150001	39250000	0.0661266	IPO7,ZNF143
NC_030827.1	38100001	38200000	0.0661251	LMBRD2,LOC102173506,LOC102173971,CAPSL
NC_030825.1	51800001	51900000	0.0658808	CNFN,MEGF8,TMEM145,PRR19,PAFAH1B3,CIC
NC_030825.1	19750001	19850000	0.0658208	.
NC_030831.1	37250001	37350000	0.0657726	NDC80,TRNAE-UUC,SMCHD1
NC_030810.1	101350001	101450000	0.0656435	LOC108635625,TRNAQ-CUG,TRNAN-GUU,TRNAV-CAC,TRNAE-UUC,TRNAG-CCC,TRNAH-GUG,TRNAV-AAC,TRNAV-AAC,TRNAV-AAC,TRNAG-CCC,TRNAE-UUC,TRNAV-CAC,TRNAN-GUU,TRNAQ-CUG,TRNAV-CAC,TRNAQ-CUG
NC_030817.1	2850001	2950000	0.0655762	EML5,ZC3H14
NC_030820.1	78400001	78500000	0.0655504	KCNG1,LOC106502801
NC_030820.1	45950001	46050000	0.0655396	.
NC_030820.1	69950001	70050000	0.0652697	.
NC_030821.1	94300001	94400000	0.0652155	KCNQ5,KHDC3L
NC_030813.1	35200001	35300000	0.0650302	MMRN1
NC_030834.1	24800001	24900000	0.0648206	.
NC_030832.1	18700001	18800000	0.0646926	.
NC_030813.1	9950001	10050000	0.0646557	.
NC_030813.1	105550001	105650000	0.0646097	WDR1
NC_030834.1	20050001	20150000	0.0644961	TNKS
NC_030816.1	49300001	49400000	0.0643664	.
NC_030811.1	44450001	44550000	0.0641981	.
NC_030814.1	100200001	100300000	0.0640901	LOC102169661,LOC102169376,LOC102171141,LOC102170865
NC_030820.1	65850001	65950000	0.0640349	SRC
NC_030811.1	95600001	95700000	0.0639998	ISPD
NC_030819.1	67250001	67350000	0.0639772	KPNA3
NC_030822.1	20200001	20300000	0.0636577	.
NC_030814.1	20800001	20900000	0.063606	.
NC_030810.1	112300001	112400000	0.0634733	DUSP12,ATF6
NC_030813.1	77000001	77100000	0.0634475	.
NC_030811.1	65150001	65250000	0.0632468	TRNAG-CCC
NC_030811.1	42450001	42550000	0.063151	.
NC_030820.1	46450001	46550000	0.0630892	LOC108637395,PRNP,PRND,RASSF2
NC_030811.1	97050001	97150000	0.0630316	.
NC_030811.1	30650001	30750000	0.0629155	.
NC_030810.1	58750001	58850000	0.0628426	ADGRL2
NC_030824.1	27450001	27550000	0.0628294	GUCY1A3
NC_030832.1	28350001	28450000	0.0628104	.
NC_030826.1	7450001	7550000	0.0625899	SCPEP1,AKAP1
NC_030821.1	6700001	6800000	0.0625205	.
NC_030813.1	9400001	9500000	0.0623406	.
NC_030811.1	47800001	47900000	0.0621894	STEAP4,LOC108635898,SRI,ADAM22
NC_030828.1	33550001	33650000	0.0621305	ARID3B,LOC108638458
NC_030816.1	80950001	81050000	0.0620432	.
NC_030817.1	2650001	2750000	0.0619784	TTC8,EML5
NC_030823.1	31900001	32000000	0.0619347	.
NC_030818.1	71650001	71750000	0.0618743	RBKS,MRPL33,SLC4A1AP
NC_030812.1	22500001	22600000	0.0618658	EEA1
NC_030833.1	32050001	32150000	0.0618184	HPSE2,HPS1,PYROXD2
NC_030832.1	18900001	19000000	0.0618016	ANKS4B,CRYM,LOC106503575
NC_030811.1	95650001	95750000	0.0617949	.
NC_030811.1	65200001	65300000	0.0616725	.
NC_030811.1	47850001	47950000	0.0616202	SRI,ADAM22
NC_030831.1	36200001	36300000	0.0615503	.
NC_030821.1	79700001	79800000	0.0615414	.
NC_030831.1	1	100000	0.0614765	LOC102182462,LOC102185414,LOC102185965
NC_030813.1	101550001	101650000	0.0614687	.
NC_030819.1	85900001	86000000	0.0614516	LOC102171501
NC_030818.1	71600001	71700000	0.0614452	RBKS,MRPL33
NC_030810.1	112000001	112100000	0.0613371	TRNAD-GUC,TRNAL-CAG,TRNAG-UCC,TRNAE-CUC,TRNAG-GCC,LOC108635634,TRNAL-CAG,TRNAD-GUC,TRNAG-UCC,TRNAE-CUC,TRNAG-GCC,LOC108635635,TRNAL-CAG,TRNAD-GUC,TRNAG-UCC,TRNAE-CUC,LOC102184859
NC_030836.1	550001	650000	0.0613133	C29H11orf54,TAF1D,MIR2404,CEP295
NC_030835.1	13050001	13150000	0.0612338	.
NC_030811.1	87250001	87350000	0.0612057	TMEM243,CROT
NC_030811.1	44350001	44450000	0.061154	.
NC_030817.1	71900001	72000000	0.0610051	.
NC_030810.1	112200001	112300000	0.0609107	LOC102186356,FCRLA,FCRLB,DUSP12
NC_030818.1	40400001	40500000	0.0608144	VRK2,FANCL
NC_030811.1	42700001	42800000	0.0607678	STK17A,LOC106502045,LOC102187025
NC_030811.1	93150001	93250000	0.0607483	.
NC_030809.1	51500001	51600000	0.0606022	.
NC_030817.1	72000001	72100000	0.0605785	DPH6
NC_030824.1	56700001	56800000	0.0605527	FREM3
NC_030836.1	39550001	39650000	0.0604779	LOC102171498,APOOL
NC_030828.1	35400001	35500000	0.0604272	.
NC_030809.1	66100001	66200000	0.0604214	.
NC_030810.1	58800001	58900000	0.0603907	.
NC_030813.1	37450001	37550000	0.0603792	.
NC_030813.1	35650001	35750000	0.0601091	.
NC_030810.1	60300001	60400000	0.0601021	.
NC_030813.1	10150001	10250000	0.0600422	.
NC_030818.1	40000001	40100000	0.0600019	.
NC_030820.1	78650001	78750000	0.0597577	.
NC_030818.1	78250001	78350000	0.0597542	PUM2,LOC108637157,SDC1
NC_030812.1	22800001	22900000	0.0595885	.
NC_030809.1	54900001	55000000	0.0595264	.
NC_030818.1	78200001	78300000	0.0594472	PUM2
NC_030817.1	2900001	3000000	0.059282	EML5,ZC3H14,PTPN21
NC_030817.1	44250001	44350000	0.0592695	DMXL2
NC_030812.1	66050001	66150000	0.0592033	STAB2,NT5DC3
NC_030809.1	51550001	51650000	0.0592015	DNAH7,SLC39A10
NC_030813.1	37750001	37850000	0.0591905	FAM184B,LOC106502187,DCAF16
NC_030821.1	94350001	94450000	0.0591416	KHDC3L,LOC102180236,DDX43
NC_030809.1	70350001	70450000	0.0591109	.
NC_030813.1	8850001	8950000	0.058959	.
NC_030811.1	94950001	95050000	0.0589246	.
NC_030811.1	41600001	41700000	0.0588312	TRNAS-GGA
NC_030827.1	43850001	43950000	0.0587127	.
NC_030810.1	77300001	77400000	0.0587116	MFSD14A,SASS6,TRMT13,LRRC39
NC_030818.1	71350001	71450000	0.0587083	TRNAC-GCA
NC_030809.1	7150001	7250000	0.0586926	IL22RA1,IFNLR1
NC_030819.1	78250001	78350000	0.058673	.
NC_030833.1	50300001	50400000	0.0586299	.
NC_030832.1	18250001	18350000	0.0585912	ACSM4,THUMPD1
NC_030809.1	67300001	67400000	0.0585816	.
NC_030823.1	31850001	31950000	0.0585596	AKT3
NC_030814.1	108250001	108350000	0.058536	LOC102169090,LOC102180210
NC_030828.1	30450001	30550000	0.0583893	IREB2,HYKK,PSMA4,CHRNA5
NC_030808.1	24650001	24750000	0.0582692	.
NC_030820.1	65800001	65900000	0.058245	MANBAL,LOC108637372,SRC
NC_030812.1	66000001	66100000	0.0582173	.
NC_030828.1	44900001	45000000	0.0582121	KIAA0391,LOC108638517,PSMA6,LOC108638466
NC_030823.1	43150001	43250000	0.0581572	RERE
NC_030823.1	31950001	32050000	0.05814	.
NC_030821.1	6650001	6750000	0.0581312	.
NC_030812.1	25850001	25950000	0.0580491	LOC102178515
NC_030818.1	19450001	19550000	0.0579898	EIF2AK2,SULT6B1,CEBPZOS,CEBPZ,NDUFAF7,PRKD3
NC_030819.1	50500001	50600000	0.0579896	ZMYM5,ZMYM2
NC_030811.1	90950001	91050000	0.0579841	SP8
NC_030813.1	37400001	37500000	0.0579613	IBSP
NC_030824.1	27350001	27450000	0.0579085	.
NC_030812.1	66150001	66250000	0.0578613	NT5DC3,LOC102179170
NC_030811.1	94900001	95000000	0.0577932	.
NC_030826.1	47250001	47350000	0.0575851	.
NC_030811.1	42750001	42850000	0.0572808	LOC102187025
NC_030820.1	78500001	78600000	0.0572791	.
NC_030809.1	88350001	88450000	0.0572184	MBD5
NC_030808.1	120850001	120950000	0.0571018	LOC106502391
NC_030813.1	10050001	10150000	0.057042	.
NC_030830.1	46750001	46850000	0.0570144	.
NC_030818.1	71700001	71800000	0.0569306	SLC4A1AP,SUPT7L,GPN1,CCDC121
NC_030822.1	37550001	37650000	0.0568972	LOC102185550,LOC102185258,LOC102183585,LOC102183310
NC_030813.1	2500001	2600000	0.0568736	.
NC_030817.1	54950001	55050000	0.0567919	.
NC_030814.1	5900001	6000000	0.056605	TRNAC-GCA
NC_030819.1	85850001	85950000	0.0565621	LOC102171501
NC_030818.1	40350001	40450000	0.0565304	VRK2,FANCL
NC_030826.1	45650001	45750000	0.0565266	.
NC_030808.1	136150001	136250000	0.0564883	.
NC_030809.1	70300001	70400000	0.0563029	.
NC_030812.1	66200001	66300000	0.0561833	NT5DC3,LOC102179170,HSP90B1
NC_030814.1	20850001	20950000	0.0559954	.
NC_030809.1	54750001	54850000	0.0558025	.
NC_030811.1	90500001	90600000	0.0557887	LOC106502017
NC_030811.1	97100001	97200000	0.0557803	.
NC_030822.1	60000001	60100000	0.0557449	DLAT,DIXDC1
NC_030809.1	84800001	84900000	0.055709	.
NC_030818.1	71550001	71650000	0.0556674	BRE,RBKS
NC_030812.1	65250001	65350000	0.0556556	PAH
NC_030813.1	59500001	59600000	0.0555982	PDS5A
NC_030811.1	45900001	46000000	0.0555338	.
NC_030811.1	43150001	43250000	0.0554473	CAMK2B,NUDCD3
NC_030820.1	74250001	74350000	0.0554256	MMP9,SLC12A5,NCOA5
NC_030808.1	125700001	125800000	0.05532	PCOLCE2,TRPC1
NC_030825.1	13500001	13600000	0.055308	.
NC_030809.1	66450001	66550000	0.0552392	CCDC93
NC_030812.1	8400001	8500000	0.0551988	.
NC_030828.1	47950001	48050000	0.0551904	.
NC_030811.1	27900001	28000000	0.0550789	.
NC_030832.1	37400001	37500000	0.0550483	LOC102191297,LOC102191011
NC_030812.1	21800001	21900000	0.0550408	LOC102177307
NC_030814.1	10400001	10500000	0.0550242	LOC108636451,ST8SIA4
NC_030813.1	18150001	18250000	0.0550055	.
NC_030820.1	65900001	66000000	0.0549967	SRC
NC_030812.1	8450001	8550000	0.0549273	.
NC_030813.1	8900001	9000000	0.0549108	.
NC_030817.1	30050001	30150000	0.0548577	SLC38A6,TRMT5,MNAT1
NC_030832.1	33550001	33650000	0.0548198	FKBP6,TRIM50,NSUN5,LOC102181259
NC_030828.1	33600001	33700000	0.0547994	LOC108638458,LOC102172846,SEMA7A
NC_030832.1	28650001	28750000	0.0547738	.
NC_030825.1	15400001	15500000	0.0546403	CDT1,APRT,GALNS,TRAPPC2L,PABPN1L,CBFA2T3
NC_030817.1	2750001	2850000	0.0546358	.
NC_030818.1	94550001	94650000	0.0546008	DENND1A,LHX2
NC_030821.1	62450001	62550000	0.0545666	MCM4,PRKDC
NC_030811.1	27850001	27950000	0.0545645	LRRC4
NC_030819.1	43700001	43800000	0.0545617	.
NC_030836.1	21250001	21350000	0.0545118	.
NC_030822.1	20650001	20750000	0.0544857	IMMP1L,DNAJC24
NC_030820.1	46400001	46500000	0.0544506	LOC108637395,PRNP,PRND
NC_030814.1	47850001	47950000	0.0544211	LOC102174838,GM2A,CCDC69
NC_030825.1	53300001	53400000	0.0543775	ZNF112,ZNF285,ZNF180,CEACAM20
NC_030816.1	32450001	32550000	0.0543118	HACE1
NC_030832.1	18750001	18850000	0.0542418	DNAH3,TMEM159
NC_030808.1	24600001	24700000	0.054087	.
NC_030826.1	47300001	47400000	0.0540533	TANC2,LOC102171650,LOC102172296
NC_030832.1	33600001	33700000	0.0539314	FKBP6,TRIM50,NSUN5,LOC102181259,HIP1,MIR3432
NC_030808.1	48700001	48800000	0.053901	.
NC_030810.1	112150001	112250000	0.0538944	LOC108635605,LOC102186356,FCRLA
NC_030824.1	27400001	27500000	0.0538673	GUCY1A3
NC_030833.1	50450001	50550000	0.0538188	.
NC_030832.1	14950001	15050000	0.0538107	.
NC_030820.1	60900001	61000000	0.0537915	HCK,TM9SF4,PLAGL2
NC_030808.1	35950001	36050000	0.0537846	.
NC_030812.1	21100001	21200000	0.0537641	.
NC_030824.1	26500001	26600000	0.0537625	FBRSL1
NC_030811.1	34900001	35000000	0.0537023	KCND2
NC_030832.1	20900001	21000000	0.0536985	LOC106503611,TRNAV-CAC,SCNN1B,COG7
NC_030821.1	79650001	79750000	0.0536863	.
NC_030813.1	10400001	10500000	0.0536824	.
NC_030809.1	51600001	51700000	0.0536649	DNAH7,SLC39A10
NC_030825.1	52000001	52100000	0.0534485	POU2F2,ZNF574,GRIK5
NC_030812.1	109650001	109750000	0.0534369	RPL3,SYNGR1
NC_030811.1	87300001	87400000	0.0534154	CROT,ABCB4
NC_030818.1	74050001	74150000	0.0533198	ADCY3,CENPO,PTRHD1
NC_030811.1	91000001	91100000	0.0532966	SP8,ABCB5
NC_030833.1	32000001	32100000	0.0532065	HPSE2,HPS1
NC_030813.1	88150001	88250000	0.0532053	.
NC_030821.1	62400001	62500000	0.053195	UBE2V2,MCM4,PRKDC
NC_030825.1	52500001	52600000	0.0531511	LOC102182532,CXCL17,LOC108637992,CD177,TEX101,LOC108638072
NC_030808.1	109150001	109250000	0.0530976	.
NC_030818.1	40050001	40150000	0.0530226	.
NC_030813.1	102250001	102350000	0.0530097	AFF1,LOC108636236
NC_030812.1	5650001	5750000	0.0529905	.
NC_030828.1	47900001	48000000	0.0529629	.
NC_030832.1	30500001	30600000	0.0529559	.
NC_030813.1	36450001	36550000	0.0528555	.
NC_030821.1	79750001	79850000	0.0528403	.
NC_030826.1	55200001	55300000	0.0528206	LLGL2,TSEN54,CASKIN2,TMEM94
NC_030820.1	45900001	46000000	0.0527204	DIP2C
NC_030833.1	44050001	44150000	0.0526904	.
NC_030813.1	101400001	101500000	0.052667	.
NC_030822.1	76000001	76100000	0.0525347	TRNAD-GUC,BIRC3
NC_030812.1	8350001	8450000	0.0524125	.
NC_030833.1	42300001	42400000	0.052375	MINPP1,TRNAE-UUC,TRNAG-CCC
NC_030813.1	101450001	101550000	0.0523735	.
NC_030808.1	132450001	132550000	0.0523535	STAG1,PCCB
NC_030825.1	20300001	20400000	0.0523273	N4BP1
NC_030811.1	90850001	90950000	0.0523182	.
NC_030836.1	21600001	21700000	0.052261	.
NC_030813.1	59450001	59550000	0.0522506	PDS5A
NC_030818.1	18300001	18400000	0.0522298	.
NC_030822.1	20700001	20800000	0.0522291	DNAJC24,DCDC1
NC_030822.1	20150001	20250000	0.052223	.
NC_030825.1	21300001	21400000	0.0522211	.
NC_030825.1	15550001	15650000	0.0521863	ACSF3
NC_030809.1	83850001	83950000	0.0521718	.
NC_030825.1	6450001	6550000	0.0521244	WWOX
NC_030813.1	53950001	54050000	0.0521165	.
NC_030825.1	50850001	50950000	0.0520213	NUMBL,COQ8B,ITPKC,C18H19orf54,SNRPA,MIA,RAB4B,EGLN2
NC_030812.1	25500001	25600000	0.0520054	NFE2,HNRNPA1,CBX5,SMUG1
NC_030820.1	78600001	78700000	0.0519676	.
NC_030809.1	77050001	77150000	0.051868	HNMT
NC_030809.1	76850001	76950000	0.0518631	.
NC_030815.1	109900001	110000000	0.0518371	PSMD5,LOC102182036,PHF19
NC_030810.1	64000001	64100000	0.0518003	LOC102184685,HS2ST1
NC_030836.1	22200001	22300000	0.0517882	.
NC_030818.1	76600001	76700000	0.0517669	.
NC_030808.1	125750001	125850000	0.0517626	PCOLCE2,TRPC1
NC_030813.1	101500001	101600000	0.0517212	.
NC_030832.1	21050001	21150000	0.0517134	COG7,GGA2,EARS2
NC_030813.1	77050001	77150000	0.0516048	.
NC_030823.1	32100001	32200000	0.0515792	AKT3,SDCCAG8
NC_030832.1	35800001	35900000	0.0514523	.
NC_030819.1	78050001	78150000	0.0513254	.
NC_030812.1	67700001	67800000	0.0512773	.
NC_030812.1	58700001	58800000	0.0512289	LOC106502116,NTN4
NC_030808.1	129500001	129600000	0.0511852	.
NC_030833.1	4050001	4150000	0.0511548	.
NC_030825.1	19150001	19250000	0.0511157	.
NC_030811.1	46450001	46550000	0.0511067	.
NC_030831.1	8800001	8900000	0.0509742	.
NC_030813.1	18000001	18100000	0.0509475	.
NC_030822.1	75250001	75350000	0.0508947	.
NC_030813.1	32650001	32750000	0.0508849	.
NC_030832.1	18850001	18950000	0.050871	ANKS4B,ZP2,CRYM
NC_030811.1	46200001	46300000	0.0508307	.
NC_030836.1	22000001	22100000	0.0508073	.
NC_030814.1	12600001	12700000	0.0508051	RGMB
NC_030832.1	35300001	35400000	0.0507884	YWHAG,TRNAG-CCC,SSC4D,ZP3,DTX2
NC_030822.1	45100001	45200000	0.0507391	.
NC_030811.1	44200001	44300000	0.0507339	.
NC_030813.1	57000001	57100000	0.0507281	.
NC_030811.1	70200001	70300000	0.0506602	LOC102179160,STARD3NL
NC_030818.1	40450001	40550000	0.0506578	FANCL
NC_030832.1	19150001	19250000	0.0505857	LOC108633910
NC_030812.1	65850001	65950000	0.0505778	.
NC_030813.1	10500001	10600000	0.0505602	.
NC_030818.1	20150001	20250000	0.0505595	RMDN2
NC_030813.1	18050001	18150000	0.0505589	.
NC_030828.1	46850001	46950000	0.0505403	.
NC_030810.1	77200001	77300000	0.0505001	SLC35A3,MFSD14A
NC_030810.1	60350001	60450000	0.0504739	.
NC_030809.1	50200001	50300000	0.0504525	.
NC_030814.1	100250001	100350000	0.050445	LOC102169376,LOC102171141,LOC102170865,LOC108636448,LOC102170309
NC_030832.1	33650001	33750000	0.0503929	HIP1,MIR3432,TRNAA-CGC
NC_030818.1	76650001	76750000	0.0503782	.
NC_030820.1	46000001	46100000	0.0503776	.
NC_030832.1	10800001	10900000	0.0503599	.
NC_030809.1	66150001	66250000	0.0503347	.
NC_030816.1	81000001	81100000	0.0502051	.
NC_030819.1	46850001	46950000	0.0501924	.
NC_030811.1	90900001	91000000	0.050183	.
NC_030817.1	76200001	76300000	0.0501717	CCNB1IP1,LOC102180501,PARP2,TEP1,KLHL33,LOC106502531
NC_030832.1	30600001	30700000	0.0501322	.
NC_030822.1	73900001	74000000	0.0501018	.
NC_030812.1	22550001	22650000	0.0500764	.
NC_030823.1	43200001	43300000	0.0500152	.

## Sheet: Table S4
Table S4. Association between loci on HS3ST2 and litter size of Yunshang black goats.
Loci	p-value1
	LS1	LS2	LS3	LS4	LS5
g.20423876C>T	0.01* (n=534)	0.09 (n=225)	0.57 (n=269)	0.99 (n=176)	0.41 (n=124)
g.20424095G>T	0.79 (n=458)	0.28 (n=270)	0.72 (n=224)	0.64 (n=141)	0.96 (n=99)
g.20422882G>C	0.11 (n=539)	0.38 (n=330)	0.88 (n=274)	0.33 (n=180)	0.52 (n=126)
1Chi-squared test/Fisher's exact test.
LSn denote the litter size of nth parity. The number in the parentheses is sample size. * p-value < 0.05.

## Sheet: Table S5
Table S5. Ovarian mRNA expression of CHST11 and SDCCAG8 in Yunshang black goats.
Gene	Transcript	Luteal phase (LG vs HG)				Follicular phase (LG vs HG)
		log2(FC)	p-value	q-value		log2(FC)	p-value	q-value
CHST11	XM_005680565.3	-0.78	0.71	1		-0.07	0.96	1
	XM_018048194.1	2.79	0.15	0.77		-3.73	0.1	0.83
	XM_018048195.1	2.82	0.33	0.96		-2.48	0.42	1
	XM_018048196.1	-1.71	0.38	0.98		-0.75	0.15	0.94
SDCCAG8	XM_005690561.3	0.44	0.12	0.71		-0.22	0.27	1
	XM_013970100.2	-0.24	0.81	1		-0.23	0.81	1
	XM_013970101.2	-0.58	0.61	1		-0.25	0.57	1
	XM_013970102.2	20.91	5.1e-12	3.7e-10		22.45	1.2e-13	2.3e-11
	XM_013970103.2	0.26	0.93	1		-22.12	2.8e-13	4e-11
	XM_018060257.1	1.39	0.56	1		0.05	0.99	1
	XM_018060258.1	-2.08	0.34	0.96		2.58	0.16	0.94
LG: low-yield group; HG: high-yield group; FC: fold change.

## Sheet: Table S6
Table S6. Differentially expressed mRNAs of Yunshang black goat ovaries at luteal phase.
transcript_id	gene_id	gene_name	log2.FoldChange.	pvalue	qvalue	Up/Down
XM_018064125.1	gene-SEPT4	2021-09-04	1.80473	7.56e-05	0.00369314	up
XM_018044737.1	gene-SEPT6	2021-09-06	-4.11483	0.000386525	0.016004	down
Novel_000030	XLOC_000406	.	-2.82375	0.00120114	0.0422157	down
Novel_000039	XLOC_000752	.	-6.43846	0.000599624	0.0233097	down
Novel_000071	XLOC_001653	.	23.2408	1.6e-14	4.36e-12	up
Novel_000082	XLOC_001698	.	24.4686	6.22e-16	4.56e-13	up
Novel_000086	XLOC_001698	.	5.41632	0.00140795	0.0479202	up
Novel_000087	XLOC_001698	.	4.52693	0.000143329	0.0066576	up
Novel_000112	XLOC_001898	.	23.3077	1.36e-14	3.99e-12	up
Novel_000120	XLOC_001916	.	1.44498	0.000240275	0.0105591	up
Novel_000130	XLOC_001960	.	-25.1621	9.24e-17	1.17e-13	down
Novel_000137	XLOC_002012	.	23.3384	1.49e-19	1.18e-15	up
Novel_000145	XLOC_002074	.	-7.88425	4.86e-05	0.00247584	down
Novel_000153	XLOC_002096	.	1.01055	0.0003456	0.0145501	up
Novel_000164	XLOC_002124	.	-22.1281	2.71e-13	3.35e-11	down
Novel_000165	XLOC_002124	.	-22.4876	1.11e-13	1.68e-11	down
Novel_000170	XLOC_002128	.	-21.5351	1.18e-12	1.08e-10	down
Novel_000215	XLOC_002719	.	21.7652	6.58e-13	6.91e-11	up
Novel_000220	XLOC_002719	.	-23.2819	1.46e-14	4.15e-12	down
Novel_000221	XLOC_002719	.	-24.2108	1.25e-15	7.34e-13	down
Novel_000222	XLOC_002719	.	-23.2463	1.6e-14	4.36e-12	down
Novel_000246	XLOC_002855	.	22.8541	4.35e-14	8.42e-12	up
Novel_000260	XLOC_003153	.	-22.0063	3.7e-13	4.29e-11	down
Novel_000269	XLOC_003196	.	-22.8258	4.72e-14	8.91e-12	down
Novel_000271	XLOC_003196	.	22.1607	2.47e-13	3.09e-11	up
Novel_000279	XLOC_003418	.	-21.8605	5.3e-13	5.8e-11	down
Novel_000321	XLOC_003936	.	-23.509	8.07e-15	2.74e-12	down
Novel_000324	XLOC_003936	.	21.7378	7.04e-13	7.22e-11	up
Novel_000340	XLOC_004096	.	-21.7233	7.43e-13	7.46e-11	down
Novel_000362	XLOC_004316	.	22.9275	3.61e-14	7.58e-12	up
Novel_000363	XLOC_004316	.	22.2714	1.88e-13	2.49e-11	up
Novel_000369	XLOC_004327	.	-22.4273	1.3e-13	1.91e-11	down
Novel_000422	XLOC_004688	.	22.5715	8.91e-14	1.41e-11	up
Novel_000448	XLOC_004795	.	-21.5343	1.18e-12	1.08e-10	down
Novel_000461	XLOC_004844	.	20.6287	9.95e-12	6.86e-10	up
Novel_000487	XLOC_005069	.	-22.8365	4.59e-14	8.79e-12	down
Novel_000496	XLOC_005203	.	1.30437	0.00142306	0.0482837	up
Novel_000503	XLOC_005279	.	-7.59094	3.95e-06	0.000227746	down
Novel_000508	XLOC_005279	.	8.53512	0.00137666	0.0471681	up
Novel_000512	XLOC_005372	.	-21.7296	7.32e-13	7.4e-11	down
Novel_000562	XLOC_005735	.	10.1273	6.41e-05	0.00316892	up
Novel_000564	XLOC_005759	.	1.89774	0.0012655	0.0439115	up
Novel_000571	XLOC_005988	.	-21.9805	3.92e-13	4.47e-11	down
Novel_000582	XLOC_006111	.	24.5851	4.53e-16	3.63e-13	up
Novel_000597	XLOC_006146	.	-21.7251	7.4e-13	7.44e-11	down
Novel_000624	XLOC_006945	.	0.66473	0.000503912	0.0201364	up
Novel_000651	XLOC_007442	.	-22.8803	4.11e-14	8.2e-12	down
Novel_000705	XLOC_008543	.	-21.3184	1.99e-12	1.63e-10	down
Novel_000829	XLOC_010431	.	-7.73032	5.26e-06	0.000299922	down
Novel_000865	XLOC_011400	.	1.07294	0.000762067	0.028828	up
Novel_000868	XLOC_011414	.	21.3997	1.6e-12	1.36e-10	up
Novel_000922	XLOC_011906	.	21.6226	9.32e-13	8.92e-11	up
Novel_000951	XLOC_012117	.	21.1604	2.83e-12	2.18e-10	up
Novel_000969	XLOC_012235	.	20.8899	5.39e-12	3.91e-10	up
Novel_001001	XLOC_012426	.	-9.12312	0.000261501	0.0113603	down
Novel_001002	XLOC_012426	.	21.899	4.74e-13	5.28e-11	up
Novel_001113	XLOC_013353	.	2.71932	0.00110202	0.0393664	up
Novel_001183	XLOC_013859	.	23.237	1.63e-14	4.36e-12	up
Novel_001246	XLOC_014617	.	1.14831	0.0010888	0.0389737	up
Novel_001325	XLOC_015547	.	0.652136	2.49e-07	1.53e-05	up
Novel_001348	XLOC_015922	.	-24.5532	4.96e-16	3.9e-13	down
Novel_001420	XLOC_017292	.	5.90877	0.00108861	0.0389737	up
Novel_001430	XLOC_017318	.	22.7994	5e-14	9.21e-12	up
Novel_001437	XLOC_017318	.	25.0609	1.22e-16	1.42e-13	up
Novel_001441	XLOC_017318	.	22.9678	3.26e-14	7.07e-12	up
Novel_001451	XLOC_017453	.	3.03859	9.72e-06	0.000539578	up
Novel_001528	XLOC_018863	.	22.9445	3.46e-14	7.34e-12	up
Novel_001529	XLOC_018863	.	-2.12525	2.56e-06	0.000150019	down
Novel_001534	XLOC_018887	.	21.6226	9.32e-13	8.92e-11	up
Novel_001579	XLOC_019107	.	8.66732	5.04e-05	0.00255875	up
Novel_001582	XLOC_019107	.	20.9139	5.09e-12	3.72e-10	up
Novel_001584	XLOC_019137	.	-23.4268	1.34e-16	1.49e-13	down
Novel_001624	XLOC_019531	.	22.8737	2e-15	1.03e-12	up
Novel_001628	XLOC_019531	.	-2.94088	5.25e-05	0.00264565	down
Novel_001673	XLOC_019772	.	-22.0608	3.23e-13	3.87e-11	down
Novel_001690	XLOC_019896	.	9.4878	4.68e-08	2.92e-06	up
Novel_001697	XLOC_019913	.	-10.9167	3.84e-06	0.000221829	down
Novel_001698	XLOC_019913	.	24.6291	4.02e-16	3.28e-13	up
Novel_001717	XLOC_020029	.	22.0279	3.46e-13	4.09e-11	up
Novel_001732	XLOC_020147	.	0.520574	0.00115303	0.0408947	up
Novel_001737	XLOC_020330	.	7.5793	1.27e-05	0.000700436	up
Novel_001759	XLOC_020445	.	3.45023	0.000213899	0.00952478	up
Novel_001767	XLOC_020494	.	-8.24954	0.00078561	0.0295648	down
Novel_001773	XLOC_020576	.	-5.6487	1.73e-05	0.000935836	down
Novel_001789	XLOC_020701	.	6.42927	3.73e-05	0.00193487	up
Novel_001807	XLOC_020939	.	-22.1823	2.39e-13	3.02e-11	down
Novel_001815	XLOC_020969	.	4.79574	0.00038981	0.0161234	up
Novel_001839	XLOC_021134	.	0.708468	0.00139642	0.0476023	up
Novel_001851	XLOC_021527	.	21.6224	9.32e-13	8.92e-11	up
Novel_001856	XLOC_021608	.	-21.8881	4.96e-13	5.47e-11	down
Novel_001877	XLOC_021764	.	-22.2983	1.79e-13	2.42e-11	down
Novel_001902	XLOC_022275	.	-23.5903	6.52e-15	2.39e-12	down
Novel_001935	XLOC_023250	.	10.6546	4.43e-12	3.29e-10	up
Novel_002019	XLOC_024021	.	-24.729	3.06e-16	2.65e-13	down
Novel_002030	XLOC_024263	.	-22.2359	2.09e-13	2.72e-11	down
Novel_002032	XLOC_024263	.	-23.6366	5.77e-15	2.23e-12	down
Novel_002087	XLOC_024653	.	-22.2827	1.83e-13	2.45e-11	down
Novel_002103	XLOC_024704	.	0.591898	0.00058233	0.0227591	up
Novel_002142	XLOC_025045	.	7.56075	5.05e-05	0.00256487	up
Novel_002179	XLOC_025353	.	0.694979	0.00148399	0.0499241	up
Novel_002269	XLOC_026061	.	-21.1375	3.08e-12	2.34e-10	down
Novel_002302	XLOC_026459	.	21.9446	4.24e-13	4.79e-11	up
Novel_002324	XLOC_026801	.	-22.62	7.96e-14	1.29e-11	down
Novel_002329	XLOC_026877	.	9.32758	0.000195681	0.00879436	up
Novel_002343	XLOC_027185	.	22.9719	3.22e-14	7.05e-12	up
Novel_002358	XLOC_027343	.	-5.68006	0.00133032	0.0458772	down
Novel_002376	XLOC_027489	.	-21.4219	1.55e-12	1.33e-10	down
Novel_002391	XLOC_027740	.	-22.622	7.92e-14	1.29e-11	down
Novel_002430	XLOC_028339	.	25.0984	1.1e-16	1.32e-13	up
Novel_002445	XLOC_028605	.	20.9069	5.17e-12	3.77e-10	up
Novel_002486	XLOC_028804	.	20.4548	1.49e-11	9.98e-10	up
Novel_002505	XLOC_028900	.	1.90333	4.56e-07	2.76e-05	up
Novel_002533	XLOC_029137	.	-22.1657	2.49e-13	3.11e-11	down
Novel_002540	XLOC_029171	.	-22.3315	1.65e-13	2.28e-11	down
Novel_002544	XLOC_029171	.	24.2459	1.14e-15	6.92e-13	up
Novel_002550	XLOC_029171	.	-10.8402	1.64e-05	0.000892421	down
Novel_002693	XLOC_030349	.	22.2996	1.76e-13	2.39e-11	up
Novel_002742	XLOC_030585	.	-3.20224	9.55e-06	0.00053063	down
Novel_002744	XLOC_030585	.	10.8915	1.86e-05	0.00100269	up
Novel_002745	XLOC_030585	.	23.6344	5.78e-15	2.23e-12	up
Novel_002747	XLOC_030585	.	11.2006	0.000214738	0.0095524	up
Novel_002840	XLOC_031192	.	21.5352	1.15e-12	1.06e-10	up
Novel_002870	XLOC_031775	.	-21.8561	5.36e-13	5.85e-11	down
Novel_002879	XLOC_031823	.	1.44278	0.000172568	0.00784859	up
Novel_002900	XLOC_032308	.	20.6008	1.06e-11	7.26e-10	up
Novel_002909	XLOC_032504	.	1.31915	5.26e-05	0.00264751	up
Novel_002914	XLOC_032902	.	23.1448	2.07e-14	5.2e-12	up
Novel_002917	XLOC_032902	.	-23.2354	1.64e-14	4.36e-12	down
Novel_002961	XLOC_033422	.	21.3908	1.63e-12	1.38e-10	up
Novel_002990	XLOC_033672	.	21.7749	6.43e-13	6.8e-11	up
Novel_003000	XLOC_033779	.	-4.56349	1.69e-06	0.000100337	down
Novel_003002	XLOC_033811	.	-21.6226	9.51e-13	9.08e-11	down
Novel_003009	XLOC_033981	.	-24.0481	1.94e-15	1.01e-12	down
Novel_003035	XLOC_034258	.	-22.3375	1.6e-13	2.23e-11	down
Novel_003038	XLOC_034289	.	-19.3648	1.65e-10	1.07e-08	down
Novel_003058	XLOC_034414	.	-22.6705	7.01e-14	1.18e-11	down
Novel_003069	XLOC_034449	.	4.91872	2.42e-07	1.49e-05	up
Novel_003099	XLOC_034728	.	21.7533	6.78e-13	7.02e-11	up
Novel_003157	XLOC_035531	.	6.62517	0.000116981	0.00551899	up
Novel_003165	XLOC_035555	.	20.7557	7.39e-12	5.23e-10	up
Novel_003250	XLOC_036268	.	-21.4943	1.3e-12	1.16e-10	down
Novel_003258	XLOC_036279	.	6.6593	0.000929935	0.034185	up
Novel_003260	XLOC_036279	.	20.7245	7.95e-12	5.56e-10	up
Novel_003276	XLOC_036409	.	8.44947	4.81e-05	0.00245455	up
Novel_003279	XLOC_036409	.	-7.84331	0.00148218	0.0498824	down
Novel_003294	XLOC_036558	.	-22.8258	4.72e-14	8.91e-12	down
Novel_003302	XLOC_036645	.	-24.1717	1.39e-15	7.88e-13	down
Novel_003334	XLOC_036774	.	22.6838	6.68e-14	1.13e-11	up
Novel_003348	XLOC_036774	.	-4.91494	0.00059775	0.0232576	down
Novel_003349	XLOC_036774	.	-8.66297	0.00145865	0.0492043	down
Novel_003369	XLOC_037151	.	-8.89949	0.000328387	0.0138924	down
Novel_003405	XLOC_037334	.	2.37477	5.41e-07	3.26e-05	up
Novel_003406	XLOC_037334	.	3.12342	0.00114332	0.040642	up
Novel_003407	XLOC_037374	.	2.21083	9.24e-06	0.000513948	up
Novel_003423	XLOC_037927	.	-21.9667	4.07e-13	4.62e-11	down
Novel_003425	XLOC_037927	.	-21.7732	6.57e-13	6.91e-11	down
Novel_003428	XLOC_037939	.	9.6512	0.000105019	0.00499243	up
Novel_003476	XLOC_038951	.	20.846	5.97e-12	4.29e-10	up
Novel_003481	XLOC_038951	.	20.74	7.67e-12	5.4e-10	up
Novel_003503	XLOC_039241	.	0.83994	0.000526089	0.0208223	up
Novel_003558	XLOC_039878	.	-23.8961	2.91e-15	1.36e-12	down
Novel_003600	XLOC_040657	.	-19.3648	1.65e-10	1.07e-08	down
Novel_003613	XLOC_040789	.	-9.97748	0.000965342	0.0352785	down
Novel_003638	XLOC_041194	.	20.8609	5.77e-12	4.15e-10	up
Novel_003687	XLOC_041596	.	-22.411	1.35e-13	1.96e-11	down
Novel_003707	XLOC_041658	.	7.08137	0.00145278	0.0490252	up
Novel_003712	XLOC_041658	.	8.06427	9.63e-06	0.00053453	up
Novel_003726	XLOC_041658	.	6.49463	2.85e-09	1.82e-07	up
Novel_003757	XLOC_041781	.	-7.46119	0.000558649	0.021922	down
Novel_003758	XLOC_041781	.	8.81268	3.84e-07	2.34e-05	up
Novel_003846	XLOC_042879	.	-23.0132	2.92e-14	6.55e-12	down
Novel_003900	XLOC_043575	.	-21.2078	2.6e-12	2.02e-10	down
Novel_003921	XLOC_043852	.	-27.452	1.18e-19	1.03e-15	down
Novel_003929	XLOC_044017	.	10.8821	1.33e-05	0.000730112	up
Novel_003974	XLOC_044581	.	-7.53697	8.35e-06	0.000465575	down
Novel_004014	XLOC_045418	.	0.63008	6.72e-05	0.003309	up
Novel_004030	XLOC_045779	.	-3.34686	0.000307102	0.0130744	down
Novel_004032	XLOC_045962	.	-8.45097	0.000775206	0.0292742	down
Novel_004041	XLOC_046051	.	22.0227	3.5e-13	4.11e-11	up
Novel_004078	XLOC_046823	.	-22.0972	2.95e-13	3.57e-11	down
Novel_004103	XLOC_047163	.	21.3993	1.6e-12	1.36e-10	up
Novel_004123	XLOC_047257	.	-23.1738	1.93e-14	4.91e-12	down
Novel_004124	XLOC_047257	.	2.65095	0.00135071	0.046498	up
Novel_004181	XLOC_047556	.	-7.51408	1.03e-05	0.000568093	down
Novel_004185	XLOC_047560	.	21.4785	1.32e-12	1.18e-10	up
Novel_004203	XLOC_047560	.	-21.3081	2.04e-12	1.66e-10	down
Novel_004209	XLOC_047560	.	22.8924	3.95e-14	8.01e-12	up
Novel_004210	XLOC_047560	.	21.7536	6.77e-13	7.02e-11	up
Novel_004227	XLOC_047560	.	22.5058	1.05e-13	1.61e-11	up
Novel_004258	XLOC_047726	.	-22.9971	3.04e-14	6.74e-12	down
Novel_004328	XLOC_048230	.	20.8664	5.69e-12	4.11e-10	up
Novel_004330	XLOC_048230	.	21.1449	2.94e-12	2.25e-10	up
Novel_004334	XLOC_048230	.	20.9613	4.55e-12	3.37e-10	up
Novel_004336	XLOC_048230	.	20.5796	1.12e-11	7.59e-10	up
Novel_004371	XLOC_048585	.	20.4125	1.65e-11	1.1e-09	up
Novel_004381	XLOC_048660	.	-21.4392	1.49e-12	1.29e-10	down
Novel_004400	XLOC_048965	.	6.97963	1.97e-05	0.00106409	up
Novel_004438	XLOC_049304	.	4.23343	0.00124661	0.0434462	up
Novel_004442	XLOC_049314	.	2.25448	0.00131279	0.0453181	up
Novel_004452	XLOC_049355	.	-22.0329	3.46e-13	4.09e-11	down
Novel_004453	XLOC_049355	.	-9.47036	8.53e-08	5.3e-06	down
Novel_004455	XLOC_049355	.	-8.36051	1.87e-05	0.00100997	down
Novel_004456	XLOC_049355	.	-21.6899	8.06e-13	7.93e-11	down
Novel_004457	XLOC_049355	.	-9.25435	3.9e-07	2.37e-05	down
Novel_004461	XLOC_049355	.	-22.4992	1.08e-13	1.64e-11	down
Novel_004556	XLOC_050171	.	-21.7148	7.58e-13	7.55e-11	down
Novel_004558	XLOC_050176	.	21.7256	7.25e-13	7.38e-11	up
Novel_004618	XLOC_050545	.	-22.2878	1.84e-13	2.45e-11	down
Novel_004619	XLOC_050554	.	9.85477	0.000140328	0.00652519	up
Novel_004621	XLOC_050554	.	22.7852	5.18e-14	9.44e-12	up
Novel_004664	XLOC_050809	.	-23.2747	1.49e-14	4.21e-12	down
Novel_004669	XLOC_050835	.	2.18471	0.000688135	0.0263281	up
Novel_004673	XLOC_050842	.	8.49033	5.4e-05	0.00271294	up
Novel_004674	XLOC_050842	.	-9.37641	0.000163749	0.00749835	down
Novel_004687	XLOC_050856	.	9.5563	0.000377666	0.0156849	up
Novel_004713	XLOC_050992	.	21.27	2.18e-12	1.76e-10	up
Novel_004714	XLOC_050992	.	-22.3823	1.45e-13	2.08e-11	down
Novel_004721	XLOC_051029	.	-23.2378	1.63e-14	4.36e-12	down
Novel_004724	XLOC_051029	.	-23.9593	2.46e-15	1.2e-12	down
Novel_004745	XLOC_051176	.	-23.0111	2.94e-14	6.56e-12	down
Novel_004752	XLOC_051182	.	-2.53139	5.52e-05	0.00276147	down
Novel_004832	XLOC_053000	.	4.67928	0.0011198	0.0399197	up
Novel_004842	XLOC_053068	.	21.4067	1.57e-12	1.34e-10	up
Novel_004847	XLOC_053070	.	-10.2102	7.26e-05	0.00355053	down
Novel_004849	XLOC_053070	.	8.45047	0.000553852	0.0217534	up
Novel_004857	XLOC_053070	.	21.22	2.46e-12	1.93e-10	up
Novel_004858	XLOC_053070	.	23.0181	2.86e-14	6.53e-12	up
Novel_004869	XLOC_053070	.	21.5117	1.22e-12	1.11e-10	up
Novel_004881	XLOC_053070	.	-22.2857	1.85e-13	2.46e-11	down
Novel_004900	XLOC_053070	.	-21.7587	6.8e-13	7.03e-11	down
Novel_004901	XLOC_053070	.	-8.51336	0.000574089	0.0224572	down
Novel_004907	XLOC_053080	.	-21.4121	1.59e-12	1.35e-10	down
Novel_004936	XLOC_053300	.	6.9772	1.75e-09	1.12e-07	up
Novel_004950	XLOC_053341	.	-3.97573	1.49e-05	0.000812103	down
Novel_004954	XLOC_053354	.	0.545272	0.000347959	0.0146166	up
Novel_004993	XLOC_053515	.	-23.3359	1.26e-14	3.86e-12	down
Novel_005103	XLOC_054824	.	-5.93423	7.22e-05	0.00353763	down
Novel_005153	XLOC_055007	.	-7.25411	0.000247545	0.0108567	down
Novel_005193	XLOC_055404	.	8.41827	0.000954478	0.03494	up
Novel_005225	XLOC_056097	.	1.79212	0.000215105	0.00956179	up
Novel_005239	XLOC_056176	.	22.6951	6.52e-14	1.12e-11	up
Novel_005248	XLOC_056191	.	-22.1156	2.82e-13	3.45e-11	down
Novel_005250	XLOC_056191	.	-23.2505	1.58e-14	4.36e-12	down
Novel_005261	XLOC_056254	.	-22.4009	1.38e-13	2e-11	down
Novel_005265	XLOC_056400	.	1.39353	0.000412922	0.0169307	up
Novel_005295	XLOC_056539	.	-3.17257	0.00138152	0.047242	down
Novel_005340	XLOC_056732	.	-21.6847	8.17e-13	7.99e-11	down
Novel_005382	XLOC_056919	.	21.3372	1.86e-12	1.54e-10	up
Novel_005388	XLOC_056927	.	-22.8217	4.77e-14	8.95e-12	down
Novel_005407	XLOC_057008	.	22.4235	1.29e-13	1.89e-11	up
Novel_005418	XLOC_057173	.	21.7536	6.77e-13	7.02e-11	up
Novel_005424	XLOC_057214	.	-0.913168	5.28e-06	0.000300967	down
Novel_005435	XLOC_057271	.	21.38	1.63e-12	1.38e-10	up
Novel_005442	XLOC_057290	.	-22.079	3.09e-13	3.72e-11	down
Novel_005444	XLOC_057290	.	-22.9001	3.9e-14	7.99e-12	down
Novel_005445	XLOC_057290	.	20.4695	1.44e-11	9.68e-10	up
Novel_005447	XLOC_057290	.	-21.8355	5.45e-13	5.94e-11	down
Novel_005472	XLOC_057410	.	-6.6649	0.000760841	0.0288066	down
Novel_005498	XLOC_057444	.	-21.707	7.72e-13	7.66e-11	down
Novel_005588	XLOC_058997	.	23.8355	3.4e-15	1.52e-12	up
Novel_005593	XLOC_059023	.	7.34398	3.39e-05	0.00176468	up
Novel_005602	XLOC_059281	.	-22.6966	6.56e-14	1.12e-11	down
Novel_005606	XLOC_059301	.	20.6919	8.58e-12	5.99e-10	up
Novel_005633	XLOC_059771	.	9.20858	1.47e-06	8.72e-05	up
Novel_005637	XLOC_059791	.	21.0889	3.36e-12	2.54e-10	up
Novel_005732	XLOC_060970	.	-5.20654	0.000960478	0.0351154	down
Novel_005760	XLOC_061228	.	22.251	1.98e-13	2.6e-11	up
Novel_005781	XLOC_061510	.	-23.0175	2.89e-14	6.53e-12	down
Novel_005782	XLOC_061510	.	-9.44582	0.000187148	0.0084413	down
Novel_005822	XLOC_061643	.	-21.8217	5.83e-13	6.28e-11	down
Novel_005851	XLOC_061883	.	20.7989	6.68e-12	4.74e-10	up
Novel_005881	XLOC_062142	.	-21.8928	4.9e-13	5.42e-11	down
Novel_005885	XLOC_062142	.	-3.35015	6.59e-06	0.000371329	down
Novel_005893	XLOC_062277	.	-21.193	2.69e-12	2.08e-10	down
Novel_005917	XLOC_062641	.	-21.1567	2.89e-12	2.21e-10	down
Novel_005944	XLOC_062936	.	22.7109	6.27e-14	1.09e-11	up
Novel_005946	XLOC_062936	.	-24.0208	2.09e-15	1.06e-12	down
Novel_005960	XLOC_063033	.	-10.9129	1.6e-05	0.00087033	down
Novel_005961	XLOC_063033	.	1.972	0.000686025	0.0262704	up
Novel_005980	XLOC_063485	.	-21.1857	2.74e-12	2.11e-10	down
Novel_005998	XLOC_063665	.	-22.8242	4.74e-14	8.91e-12	down
Novel_006001	XLOC_063665	.	21.9336	4.36e-13	4.89e-11	up
Novel_006071	XLOC_064275	.	20.2605	2.34e-11	1.54e-09	up
Novel_006078	XLOC_064275	.	8.34337	0.000622714	0.0240786	up
Novel_006089	XLOC_064322	.	20.9492	4.68e-12	3.46e-10	up
Novel_006100	XLOC_064489	.	-21.5069	1.26e-12	1.14e-10	down
Novel_006142	XLOC_065316	.	-4.07942	0.000258471	0.0112447	down
Novel_006146	XLOC_065316	.	5.73568	7.89e-05	0.00384084	up
Novel_006171	XLOC_065679	.	21.7531	6.78e-13	7.02e-11	up
Novel_006268	XLOC_066414	.	1.78978	0.000380231	0.0157721	up
Novel_006272	XLOC_066481	.	-8.16951	0.00128812	0.0445655	down
Novel_006336	XLOC_067326	.	8.02353	0.00111316	0.0397319	up
Novel_006352	XLOC_067763	.	-7.9468	1.12e-05	0.000617241	down
Novel_006354	XLOC_067763	.	22.8217	4.73e-14	8.91e-12	up
Novel_006433	XLOC_068623	.	22.9441	3.46e-14	7.34e-12	up
Novel_006436	XLOC_068623	.	20.8975	5.15e-12	3.76e-10	up
Novel_006445	XLOC_068664	.	6.61304	0.00119907	0.0421598	up
Novel_006561	XLOC_070005	.	22.3289	1.64e-13	2.27e-11	up
Novel_006570	XLOC_070301	.	2.18373	0.00141389	0.0480661	up
Novel_006581	XLOC_070333	.	-22.6421	7.53e-14	1.25e-11	down
Novel_006601	XLOC_070441	.	20.647	9.53e-12	6.58e-10	up
Novel_006625	XLOC_070512	.	21.8778	4.9e-13	5.42e-11	up
Novel_006663	XLOC_070614	.	-21.4918	1.31e-12	1.17e-10	down
Novel_006766	XLOC_070931	.	-23.0108	2.94e-14	6.56e-12	down
Novel_006780	XLOC_070931	.	-7.86553	0.00129423	0.0447305	down
Novel_006824	XLOC_071267	.	4.00404	0.000254326	0.0110817	up
Novel_006856	XLOC_071371	.	20.847	5.75e-12	4.15e-10	up
Novel_006880	XLOC_071554	.	-22.4443	1.24e-13	1.85e-11	down
Novel_006882	XLOC_071554	.	-23.0884	2.41e-14	5.88e-12	down
Novel_006928	XLOC_073125	.	7.01454	2.18e-05	0.00116701	up
Novel_006982	XLOC_075392	.	21.6627	8.45e-13	8.2e-11	up
Novel_006986	XLOC_075400	.	23.3194	1.32e-14	3.92e-12	up
Novel_007007	XLOC_075556	.	-21.8102	6e-13	6.44e-11	down
Novel_007011	XLOC_075556	.	-22.0092	3.67e-13	4.28e-11	down
Novel_007080	XLOC_076264	.	20.7881	6.85e-12	4.86e-10	up
Novel_007096	XLOC_076450	.	-9.35858	1.06e-06	6.33e-05	down
Novel_007114	XLOC_076542	.	-21.6843	8.18e-13	7.99e-11	down
Novel_007145	XLOC_076934	.	-24.9971	1.46e-16	1.59e-13	down
Novel_007148	XLOC_076957	.	20.5796	1.12e-11	7.59e-10	up
Novel_007155	XLOC_077036	.	22.3659	1.49e-13	2.12e-11	up
Novel_007191	XLOC_077756	.	-8.44618	1.91e-06	0.000112598	down
Novel_007210	XLOC_077835	.	21.1973	2.58e-12	2.01e-10	up
Novel_007234	XLOC_077951	.	-23.2447	1.61e-14	4.36e-12	down
Novel_007277	XLOC_078171	.	-0.635232	0.00121603	0.0426359	down
Novel_007363	XLOC_078618	.	21.2596	2.24e-12	1.79e-10	up
Novel_007364	XLOC_078618	.	-21.8094	6.02e-13	6.45e-11	down
Novel_007377	XLOC_078658	.	-21.2137	2.56e-12	1.99e-10	down
Novel_007380	XLOC_078658	.	-21.8439	5.53e-13	6e-11	down
Novel_007405	XLOC_078763	.	-1.86762	0.00112306	0.0400196	down
Novel_007457	XLOC_079446	.	-22.0063	3.7e-13	4.29e-11	down
Novel_007466	XLOC_079628	.	21.4067	1.57e-12	1.34e-10	up
Novel_007478	XLOC_079872	.	-23.5075	4.37e-19	2.54e-15	down
Novel_007480	XLOC_079872	.	-23.0618	2.58e-14	6.18e-12	down
Novel_007489	XLOC_080248	.	-22.0256	3.48e-13	4.09e-11	down
Novel_007492	XLOC_080275	.	-23.4496	1.56e-16	1.65e-13	down
Novel_007521	XLOC_080560	.	-22.379	1.46e-13	2.09e-11	down
Novel_007563	XLOC_081982	.	-22.3063	1.75e-13	2.39e-11	down
Novel_007612	XLOC_082664	.	-8.41317	2.99e-06	0.000174208	down
Novel_007643	XLOC_083082	.	-7.28777	1.64e-05	0.000892421	down
Novel_007690	XLOC_083671	.	0.611602	0.000368514	0.015376	up
Novel_007705	XLOC_083742	.	21.6857	7.99e-13	7.88e-11	up
Novel_007716	XLOC_083782	.	20.5292	1.26e-11	8.47e-10	up
Novel_007729	XLOC_083793	.	22.2429	2.03e-13	2.66e-11	up
Novel_007745	XLOC_083923	.	9.90431	6.85e-05	0.00337236	up
Novel_007750	XLOC_083923	.	7.5893	0.00136597	0.0469679	up
Novel_007751	XLOC_083923	.	-24.333	9.01e-16	5.96e-13	down
Novel_007753	XLOC_083923	.	-9.44599	0.000170213	0.00775364	down
Novel_007796	XLOC_084326	.	-24.9171	1.83e-16	1.7e-13	down
Novel_007800	XLOC_084326	.	21.994	3.68e-13	4.28e-11	up
Novel_007831	XLOC_085083	.	23.6237	5.94e-15	2.25e-12	up
Novel_007842	XLOC_085083	.	20.6849	8.72e-12	6.06e-10	up
Novel_007846	XLOC_085124	.	-21.8767	5.1e-13	5.59e-11	down
Novel_007852	XLOC_085166	.	-23.7358	4.44e-15	1.85e-12	down
Novel_007885	XLOC_085333	.	22.3337	1.62e-13	2.25e-11	up
Novel_007886	XLOC_085333	.	7.68163	0.000977201	0.0356819	up
Novel_007915	XLOC_085758	.	21.4725	1.34e-12	1.19e-10	up
Novel_007919	XLOC_085784	.	5.8315	7.44e-06	0.000416048	up
Novel_007940	XLOC_086143	.	-22.4159	1.33e-13	1.94e-11	down
Novel_007952	XLOC_086457	.	-21.7188	7.47e-13	7.47e-11	down
Novel_007953	XLOC_086472	.	-21.2453	2.37e-12	1.88e-10	down
Novel_007971	XLOC_086619	.	8.72816	7.05e-07	4.24e-05	up
Novel_007972	XLOC_086619	.	19.8323	5.79e-11	3.76e-09	up
Novel_007974	XLOC_086619	.	20.559	1.17e-11	7.92e-10	up
Novel_007982	XLOC_086725	.	20.258	2.23e-11	1.47e-09	up
Novel_008001	XLOC_087533	.	-23.0132	2.92e-14	6.55e-12	down
Novel_008005	XLOC_087537	.	-22.7582	5.61e-14	1.01e-11	down
Novel_008021	XLOC_087867	.	-22.7571	5.62e-14	1.01e-11	down
Novel_008048	XLOC_087906	.	-6.51425	0.000313737	0.0133244	down
Novel_008054	XLOC_087906	.	22.9708	3.23e-14	7.05e-12	up
Novel_008093	XLOC_088730	.	-1.98648	0.000287136	0.0122964	down
Novel_008099	XLOC_088766	.	-7.25408	0.00126125	0.0437926	down
Novel_008157	XLOC_089304	.	9.35983	0.000339085	0.0143034	up
Novel_008158	XLOC_089304	.	8.33329	7.37e-06	0.000412556	up
Novel_008160	XLOC_089304	.	-3.03216	4.83e-05	0.00246	down
Novel_008162	XLOC_089304	.	22.1952	2.28e-13	2.93e-11	up
Novel_008211	XLOC_089630	.	23.1089	2.27e-14	5.63e-12	up
Novel_008213	XLOC_089630	.	21.1525	2.89e-12	2.21e-10	up
Novel_008217	XLOC_089630	.	-21.9799	3.92e-13	4.47e-11	down
Novel_008263	XLOC_089825	.	-23.5487	7.28e-15	2.56e-12	down
Novel_008297	XLOC_090063	.	11.3739	0.000171071	0.0077846	up
Novel_008298	XLOC_090090	.	-22.6307	7.75e-14	1.28e-11	down
Novel_008331	XLOC_090337	.	-21.5717	1.08e-12	1e-10	down
Novel_008388	XLOC_091155	.	9.13996	0.000249809	0.0109395	up
Novel_008428	XLOC_091366	.	-22.1187	2.8e-13	3.43e-11	down
Novel_008433	XLOC_091568	.	-22.2754	1.9e-13	2.5e-11	down
Novel_008444	XLOC_091728	.	-23.3014	1.39e-14	4.03e-12	down
Novel_008445	XLOC_091728	.	-21.3191	1.99e-12	1.63e-10	down
Novel_008578	XLOC_093869	.	-22.0156	3.62e-13	4.23e-11	down
Novel_008579	XLOC_093869	.	21.3014	2.02e-12	1.65e-10	up
Novel_008580	XLOC_093869	.	21.0051	4.1e-12	3.07e-10	up
Novel_008596	XLOC_094105	.	-22.4532	1.21e-13	1.81e-11	down
Novel_008603	XLOC_094273	.	21.4865	1.27e-12	1.15e-10	up
Novel_008612	XLOC_094287	.	-22.0329	3.46e-13	4.09e-11	down
Novel_008614	XLOC_094287	.	-21.2514	2.34e-12	1.86e-10	down
Novel_008618	XLOC_094324	.	0.755973	5.16e-05	0.00261017	up
Novel_008677	XLOC_095274	.	8.82659	4.28e-13	4.82e-11	up
Novel_008719	XLOC_095695	.	4.04605	9.41e-07	5.64e-05	up
Novel_008723	XLOC_095717	.	-25.5167	3.41e-17	5.62e-14	down
Novel_008727	XLOC_095789	.	-2.88046	0.00126708	0.0439487	down
Novel_008772	XLOC_096829	.	-9.42143	0.000403797	0.0166231	down
Novel_008791	XLOC_096981	.	-22.9618	3.3e-14	7.13e-12	down
Novel_008792	XLOC_096981	.	-22.6699	7.02e-14	1.18e-11	down
Novel_008813	XLOC_097151	.	-21.1852	2.74e-12	2.11e-10	down
Novel_008878	XLOC_098201	.	23.0272	2.8e-14	6.49e-12	up
Novel_008895	XLOC_098379	.	23.5999	6.32e-15	2.35e-12	up
Novel_008937	XLOC_099120	.	-23.5678	6.92e-15	2.48e-12	down
Novel_008948	XLOC_099231	.	21.1261	3.07e-12	2.34e-10	up
Novel_008974	XLOC_099594	.	22.8221	4.72e-14	8.91e-12	up
Novel_008991	XLOC_099608	.	-4.10166	0.000461951	0.0186822	down
Novel_009010	XLOC_099828	.	20.588	1.09e-11	7.46e-10	up
Novel_009020	XLOC_099869	.	-6.65675	0.000157563	0.00724165	down
Novel_009030	XLOC_099894	.	-22.0256	3.48e-13	4.09e-11	down
Novel_009032	XLOC_099894	.	20.6011	1.06e-11	7.26e-10	up
Novel_009040	XLOC_099894	.	21.0186	3.97e-12	2.99e-10	up
Novel_009045	XLOC_099894	.	21.7929	6.15e-13	6.56e-11	up
Novel_009046	XLOC_099894	.	-22.3744	1.48e-13	2.11e-11	down
Novel_009103	XLOC_100400	.	20.6866	8.69e-12	6.05e-10	up
Novel_009133	XLOC_100906	.	9.36036	2.14e-08	1.35e-06	up
Novel_009160	XLOC_100982	.	21.3153	1.96e-12	1.61e-10	up
Novel_009196	XLOC_101078	.	-8.90345	3.49e-06	0.000202627	down
Novel_009206	XLOC_101100	.	-21.6115	9.77e-13	9.23e-11	down
Novel_009217	XLOC_101160	.	-24.185	1.34e-15	7.81e-13	down
Novel_009219	XLOC_101160	.	20.8011	6.64e-12	4.72e-10	up
Novel_009322	XLOC_102275	.	23.9979	2.21e-15	1.1e-12	up
Novel_009360	XLOC_102558	.	23.3186	1.32e-14	3.92e-12	up
Novel_009374	XLOC_102804	.	1.9173	0.00116529	0.0412549	up
Novel_009426	XLOC_103543	.	-5.22799	4.36e-05	0.00224187	down
Novel_009447	XLOC_104384	.	7.14966	0.000370357	0.0154138	up
Novel_009539	XLOC_104822	.	-21.2299	2.46e-12	1.93e-10	down
Novel_009544	XLOC_104830	.	-21.5615	1.1e-12	1.02e-10	down
Novel_009554	XLOC_104845	.	21.563	1.08e-12	1e-10	up
Novel_009571	XLOC_105104	.	20.7316	7.82e-12	5.49e-10	up
Novel_009590	XLOC_105311	.	-22.871	4.21e-14	8.28e-12	down
Novel_009595	XLOC_105407	.	5.49971	0.000984481	0.0358764	up
Novel_009610	XLOC_105804	.	22.6663	6.98e-14	1.18e-11	up
Novel_009629	XLOC_105987	.	-22.711	6.23e-14	1.08e-11	down
Novel_009630	XLOC_105987	.	-23.3916	1.09e-14	3.47e-12	down
Novel_009633	XLOC_105987	.	-7.58652	2.9e-05	0.00152288	down
Novel_009639	XLOC_105987	.	-7.62296	0.000362322	0.0151444	down
Novel_009646	XLOC_106021	.	-21.6644	8.58e-13	8.3e-11	down
Novel_009671	XLOC_106381	.	-24.6173	4.16e-16	3.36e-13	down
Novel_009678	XLOC_106399	.	-24.9272	1.77e-16	1.7e-13	down
Novel_009694	XLOC_106465	.	-8.38166	2.13e-05	0.00114273	down
Novel_009696	XLOC_106592	.	1.63255	0.000280789	0.0120661	up
Novel_009702	XLOC_106617	.	-23.8501	3.28e-15	1.48e-12	down
Novel_009703	XLOC_106617	.	23.3212	1.3e-14	3.91e-12	up
Novel_009745	XLOC_107369	.	0.793195	2.04e-05	0.00109566	up
Novel_009756	XLOC_107409	.	21.7459	6.9e-13	7.11e-11	up
Novel_009801	XLOC_108413	.	23.3099	1.35e-14	3.99e-12	up
Novel_009808	XLOC_108430	.	-23.32	1.32e-14	3.92e-12	down
Novel_009934	XLOC_109930	.	-24.2388	1.16e-15	6.94e-13	down
Novel_009949	XLOC_109974	.	-6.59275	1.09e-08	6.9e-07	down
Novel_009994	XLOC_110505	.	-21.422	1.55e-12	1.33e-10	down
Novel_009998	XLOC_110505	.	21.4627	1.37e-12	1.21e-10	up
Novel_010013	XLOC_110751	.	-21.622	9.52e-13	9.08e-11	down
Novel_010014	XLOC_110781	.	-23.1277	2.15e-14	5.39e-12	down
Novel_010016	XLOC_110781	.	1.22431	0.000925895	0.0340652	up
Novel_010020	XLOC_110802	.	21.7193	7.36e-13	7.42e-11	up
Novel_010140	XLOC_111865	.	20.6138	1.03e-11	7.07e-10	up
Novel_010254	XLOC_113590	.	20.4559	1.49e-11	9.97e-10	up
Novel_010271	XLOC_113752	.	21.4156	1.54e-12	1.32e-10	up
Novel_010283	XLOC_114021	.	-21.9836	3.91e-13	4.47e-11	down
Novel_010322	XLOC_114424	.	21.8141	5.77e-13	6.24e-11	up
Novel_010329	XLOC_114488	.	8.03159	7.69e-05	0.0037562	up
Novel_010355	XLOC_114707	.	-7.47044	0.000258165	0.0112378	down
Novel_010360	XLOC_114707	.	22.2313	2.09e-13	2.72e-11	up
Novel_010387	XLOC_115277	.	-21.2078	2.6e-12	2.02e-10	down
Novel_010436	XLOC_115860	.	22.3118	1.71e-13	2.35e-11	up
Novel_010532	XLOC_116300	.	20.7265	7.87e-12	5.52e-10	up
Novel_010555	XLOC_116322	.	22.3489	1.56e-13	2.19e-11	up
Novel_010558	XLOC_116381	.	5.33702	4.19e-05	0.00215525	up
Novel_010574	XLOC_116382	.	22.6864	6.67e-14	1.13e-11	up
Novel_010583	XLOC_116444	.	-7.44944	0.000174551	0.00792638	down
Novel_010601	XLOC_116572	.	-22.1528	2.56e-13	3.19e-11	down
Novel_010607	XLOC_116692	.	10.5235	3.35e-09	2.14e-07	up
Novel_010636	XLOC_116896	.	-23.9187	2.74e-15	1.3e-12	down
Novel_010679	XLOC_117228	.	4.38952	0.000294158	0.0125909	up
Novel_010697	XLOC_117810	.	22.3467	1.57e-13	2.2e-11	up
Novel_010787	XLOC_119510	.	-24.1799	1.36e-15	7.85e-13	down
Novel_010797	XLOC_119774	.	-21.5941	1e-12	9.45e-11	down
Novel_010854	XLOC_120530	.	20.588	1.09e-11	7.46e-10	up
Novel_010857	XLOC_120530	.	22.6779	6.77e-14	1.14e-11	up
Novel_010865	XLOC_120664	.	21.3327	1.88e-12	1.55e-10	up
Novel_010932	XLOC_121315	.	-21.4376	1.49e-12	1.29e-10	down
Novel_011013	XLOC_121561	.	-21.5065	1.26e-12	1.14e-10	down
Novel_011019	XLOC_121574	.	-6.19286	1.83e-05	0.000989201	down
Novel_011023	XLOC_121586	.	22.5455	9.51e-14	1.49e-11	up
Novel_011029	XLOC_121586	.	22.1772	2.39e-13	3.02e-11	up
Novel_011058	XLOC_121857	.	-22.1985	2.3e-13	2.94e-11	down
Novel_011061	XLOC_121857	.	23.3326	1.27e-14	3.86e-12	up
Novel_011065	XLOC_121857	.	5.83764	0.00143531	0.0485862	up
Novel_011070	XLOC_121857	.	22.401	1.37e-13	1.98e-11	up
Novel_011113	XLOC_122254	.	21.3327	1.88e-12	1.55e-10	up
Novel_011125	XLOC_122336	.	21.9985	3.71e-13	4.29e-11	up
Novel_011142	XLOC_122896	.	-21.4615	1.41e-12	1.23e-10	down
Novel_011175	XLOC_123389	.	-6.34457	0.000482214	0.0194027	down
Novel_011177	XLOC_123389	.	-4.78638	9.85e-08	6.11e-06	down
Novel_011198	XLOC_123598	.	-1.88708	0.00062085	0.0240171	down
Novel_011206	XLOC_123615	.	-22.759	5.6e-14	1.01e-11	down
Novel_011217	XLOC_123733	.	-23.0524	2.64e-14	6.28e-12	down
Novel_011222	XLOC_123733	.	-23.3502	1.22e-14	3.79e-12	down
Novel_011227	XLOC_123733	.	22.8711	4.15e-14	8.25e-12	up
Novel_011229	XLOC_123733	.	23.4285	9.91e-15	3.27e-12	up
Novel_011236	XLOC_123733	.	23.9756	2.34e-15	1.16e-12	up
Novel_011266	XLOC_124261	.	7.33084	2.71e-05	0.001428	up
Novel_011270	XLOC_124318	.	-24.0792	1.78e-15	9.51e-13	down
Novel_011295	XLOC_124657	.	21.4945	1.27e-12	1.14e-10	up
Novel_011315	XLOC_125090	.	-21.6583	8.71e-13	8.42e-11	down
Novel_011338	XLOC_125337	.	5.59371	3.96e-05	0.00204278	up
Novel_011340	XLOC_125337	.	6.96464	0.000254232	0.0110817	up
Novel_011440	XLOC_126715	.	-24.9543	1.65e-16	1.69e-13	down
Novel_011453	XLOC_126792	.	-21.7061	7.75e-13	7.67e-11	down
Novel_011471	XLOC_127083	.	21.2941	2.06e-12	1.67e-10	up
Novel_011524	XLOC_127894	.	20.4932	1.37e-11	9.19e-10	up
Novel_011541	XLOC_128196	.	-8.65135	2.31e-17	4.3e-14	down
Novel_011544	XLOC_128228	.	-5.40187	2.21e-05	0.00118181	down
Novel_011603	XLOC_129169	.	20.8837	5.47e-12	3.96e-10	up
Novel_011614	XLOC_129295	.	-8.63033	0.00122839	0.043	down
Novel_011615	XLOC_129295	.	-22.7196	6.19e-14	1.08e-11	down
Novel_011651	XLOC_129791	.	-21.4013	1.63e-12	1.38e-10	down
Novel_011672	XLOC_129926	.	-9.90691	8.34e-05	0.00404066	down
Novel_011683	XLOC_130040	.	21.7592	6.64e-13	6.96e-11	up
Novel_011687	XLOC_130050	.	-21.8175	5.9e-13	6.34e-11	down
Novel_011745	XLOC_130557	.	0.925819	0.000437246	0.0178318	up
Novel_011750	XLOC_130576	.	-21.4504	1.45e-12	1.26e-10	down
Novel_011759	XLOC_130599	.	21.6066	9.69e-13	9.19e-11	up
Novel_011820	XLOC_130860	.	-21.4532	1.44e-12	1.25e-10	down
Novel_011876	XLOC_131468	.	20.9145	5.08e-12	3.72e-10	up
Novel_011935	XLOC_131944	.	-10.0987	2.23e-05	0.00118939	down
Novel_011938	XLOC_131944	.	-21.8826	5.02e-13	5.53e-11	down
Novel_011951	XLOC_131997	.	-1.26231	0.000300385	0.012826	down
Novel_011954	XLOC_132103	.	21.7887	6.22e-13	6.6e-11	up
Novel_011998	XLOC_132637	.	-21.5261	1.18e-12	1.08e-10	down
Novel_012008	XLOC_132764	.	7.04295	9.82e-05	0.00468952	up
Novel_012051	XLOC_133302	.	-21.4532	1.44e-12	1.25e-10	down
Novel_012058	XLOC_133321	.	22.9122	3.73e-14	7.69e-12	up
Novel_012095	XLOC_133928	.	9.12733	0.00026318	0.0114219	up
Novel_012097	XLOC_133928	.	21.4345	1.47e-12	1.28e-10	up
Novel_012130	XLOC_134285	.	21.3703	1.71e-12	1.44e-10	up
Novel_012132	XLOC_134285	.	21.3891	1.64e-12	1.38e-10	up
Novel_012169	XLOC_134581	.	5.00041	0.00102628	0.0371319	up
Novel_012171	XLOC_134609	.	-23.5209	7.82e-15	2.71e-12	down
Novel_012192	XLOC_135005	.	20.3954	1.71e-11	1.14e-09	up
Novel_012198	XLOC_135048	.	-9.25922	0.000189257	0.00852761	down
Novel_012227	XLOC_135369	.	2.58542	0.000140258	0.00652519	up
Novel_012251	XLOC_135570	.	-21.2357	2.43e-12	1.92e-10	down
Novel_012275	XLOC_135677	.	22.2853	1.83e-13	2.45e-11	up
Novel_012424	XLOC_137417	.	-21.5794	1.06e-12	9.85e-11	down
Novel_012441	XLOC_137626	.	21.7421	6.96e-13	7.16e-11	up
Novel_012502	XLOC_138433	.	-20.8206	6.1e-12	4.38e-10	down
Novel_012513	XLOC_138495	.	21.1889	2.65e-12	2.05e-10	up
Novel_012562	XLOC_139456	.	23.3426	1.24e-14	3.8e-12	up
Novel_012573	XLOC_139475	.	20.8907	5.37e-12	3.91e-10	up
Novel_012583	XLOC_139735	.	-21.2078	2.6e-12	2.02e-10	down
Novel_012610	XLOC_140105	.	-22.1736	2.44e-13	3.07e-11	down
Novel_012626	XLOC_140367	.	-19.3648	1.65e-10	1.07e-08	down
Novel_012653	XLOC_140580	.	9.56747	2.15e-06	0.000126239	up
Novel_012691	XLOC_140913	.	20.5781	1.12e-11	7.6e-10	up
Novel_012739	XLOC_141402	.	-8.86097	1.69e-06	0.000100337	down
Novel_012754	XLOC_141593	.	7.49946	2.46e-05	0.00130641	up
Novel_012767	XLOC_141741	.	21.8327	5.58e-13	6.05e-11	up
Novel_012771	XLOC_141770	.	10.6111	2.63e-05	0.00139369	up
Novel_012792	XLOC_142593	.	5.69854	0.000167221	0.00763729	up
Novel_012833	XLOC_143047	.	20.7494	7.5e-12	5.29e-10	up
Novel_012849	XLOC_143049	.	-22.6705	7.01e-14	1.18e-11	down
Novel_012899	XLOC_143566	.	22.203	2.24e-13	2.89e-11	up
Novel_012900	XLOC_143598	.	20.5796	1.12e-11	7.59e-10	up
Novel_012908	XLOC_143681	.	20.9663	4.49e-12	3.33e-10	up
Novel_013003	XLOC_144495	.	-22.0056	3.71e-13	4.29e-11	down
Novel_013006	XLOC_144496	.	22.2336	2.08e-13	2.71e-11	up
Novel_013007	XLOC_144496	.	23.4236	9.99e-15	3.28e-12	up
Novel_013085	XLOC_145137	.	20.5103	1.31e-11	8.85e-10	up
Novel_013112	XLOC_145291	.	22.1304	2.68e-13	3.32e-11	up
Novel_013166	XLOC_145803	.	-21.3461	1.86e-12	1.54e-10	down
Novel_013207	XLOC_146312	.	8.60126	6.82e-08	4.24e-06	up
Novel_013230	XLOC_146654	.	20.9326	4.87e-12	3.58e-10	up
Novel_013271	XLOC_147154	.	22.9264	3.6e-14	7.58e-12	up
Novel_013278	XLOC_147170	.	22.2795	1.85e-13	2.46e-11	up
Novel_013298	XLOC_147281	.	-24.1017	1.68e-15	9.1e-13	down
Novel_013303	XLOC_147287	.	-22.5999	8.38e-14	1.34e-11	down
Novel_013391	XLOC_148111	.	23.5946	6.41e-15	2.37e-12	up
Novel_013400	XLOC_148235	.	21.3688	1.72e-12	1.45e-10	up
Novel_013407	XLOC_148235	.	21.495	1.27e-12	1.14e-10	up
Novel_013437	XLOC_148588	.	-21.7983	6.18e-13	6.58e-11	down
Novel_013452	XLOC_148795	.	21.4628	1.37e-12	1.21e-10	up
Novel_013457	XLOC_148795	.	20.8609	5.77e-12	4.15e-10	up
Novel_013481	XLOC_148821	.	-0.782125	3.34e-05	0.0017431	down
Novel_013526	XLOC_149464	.	-0.751894	9.97e-07	5.97e-05	down
Novel_013534	XLOC_149775	.	23.2625	5.82e-17	7.93e-14	up
Novel_013542	XLOC_149822	.	-22.872	4.19e-14	8.28e-12	down
Novel_013543	XLOC_149822	.	-23.0184	2.88e-14	6.53e-12	down
Novel_013546	XLOC_149822	.	22.1154	2.77e-13	3.4e-11	up
Novel_013562	XLOC_149924	.	22.3144	1.7e-13	2.34e-11	up
Novel_013565	XLOC_149924	.	20.8781	5.54e-12	4.01e-10	up
Novel_013611	XLOC_150352	.	-7.28091	0.000807258	0.030301	down
Novel_013640	XLOC_150697	.	24.4728	6.15e-16	4.55e-13	up
Novel_013654	XLOC_150856	.	20.647	9.53e-12	6.58e-10	up
Novel_013733	XLOC_151537	.	23.0392	2.71e-14	6.38e-12	up
Novel_013735	XLOC_151537	.	25.9876	8.9e-18	1.99e-14	up
Novel_013743	XLOC_151574	.	-22.0612	3.23e-13	3.87e-11	down
Novel_013745	XLOC_151574	.	-22.4352	1.27e-13	1.88e-11	down
Novel_013751	XLOC_151796	.	9.4283	3.38e-07	2.06e-05	up
Novel_013756	XLOC_151797	.	22.2287	2.1e-13	2.72e-11	up
Novel_013791	XLOC_152197	.	21.0455	3.73e-12	2.81e-10	up
Novel_013820	XLOC_152877	.	-2.15169	5.21e-05	0.00263263	down
Novel_013838	XLOC_153285	.	-21.8784	5.08e-13	5.58e-11	down
Novel_013842	XLOC_153306	.	20.4279	1.59e-11	1.06e-09	up
Novel_013916	XLOC_154116	.	2.67767	5.68e-06	0.000321901	up
Novel_013937	XLOC_154298	.	-22.3125	1.73e-13	2.36e-11	down
Novel_013938	XLOC_154298	.	20.2737	2.27e-11	1.49e-09	up
Novel_013945	XLOC_154309	.	-22.0448	3.36e-13	4e-11	down
Novel_013948	XLOC_154309	.	-23.5065	8.13e-15	2.75e-12	down
Novel_013949	XLOC_154309	.	22.7119	6.25e-14	1.09e-11	up
Novel_013963	XLOC_154309	.	23.632	5.82e-15	2.23e-12	up
Novel_014028	XLOC_154594	.	-21.4099	1.6e-12	1.36e-10	down
Novel_014046	XLOC_154989	.	21.1349	3.01e-12	2.3e-10	up
Novel_014082	XLOC_155379	.	20.3811	1.68e-11	1.12e-09	up
Novel_014100	XLOC_155563	.	-24.2522	1.12e-15	6.88e-13	down
Novel_014152	XLOC_155933	.	-22.5756	8.91e-14	1.41e-11	down
Novel_014160	XLOC_155967	.	-22.3496	1.57e-13	2.2e-11	down
Novel_014161	XLOC_155967	.	3.82573	0.00103168	0.0372579	up
Novel_014166	XLOC_155967	.	6.18945	0.000531853	0.021003	up
Novel_014189	XLOC_156209	.	-21.3184	1.99e-12	1.63e-10	down
Novel_014273	XLOC_156874	.	21.4148	1.51e-12	1.31e-10	up
Novel_014278	XLOC_156923	.	-7.94882	0.00130719	0.0451426	down
Novel_014280	XLOC_156979	.	7.34588	3.03e-05	0.00158501	up
Novel_014282	XLOC_156979	.	-23.2625	1.52e-14	4.28e-12	down
Novel_014287	XLOC_157057	.	-21.318	1.99e-12	1.63e-10	down
Novel_014314	XLOC_157379	.	-22.7949	5.11e-14	9.34e-12	down
Novel_014383	XLOC_157865	.	-23.4393	9.69e-15	3.21e-12	down
Novel_014444	XLOC_158523	.	23.5122	7.95e-15	2.72e-12	up
Novel_014455	XLOC_158695	.	0.705991	3.53e-05	0.00183713	up
Novel_014462	XLOC_158763	.	-22.3627	1.52e-13	2.15e-11	down
Novel_014543	XLOC_159302	.	-22.9373	3.55e-14	7.5e-12	down
Novel_014544	XLOC_159302	.	-21.6703	8.46e-13	8.2e-11	down
Novel_014554	XLOC_159477	.	3.46101	0.000540104	0.0212804	up
Novel_014568	XLOC_159518	.	-5.45029	0.000812716	0.0304927	down
Novel_014589	XLOC_159593	.	21.722	7.31e-13	7.4e-11	up
Novel_014595	XLOC_159636	.	5.30377	0.000316682	0.0134363	up
Novel_014604	XLOC_159778	.	-8.52545	0.000583714	0.022803	down
Novel_014630	XLOC_159927	.	21.821	5.68e-13	6.15e-11	up
Novel_014708	XLOC_160344	.	2.73921	0.00109508	0.0391506	up
Novel_014741	XLOC_160470	.	22.255	1.96e-13	2.58e-11	up
Novel_014773	XLOC_160724	.	4.74095	0.00140142	0.0477538	up
Novel_014776	XLOC_160894	.	-7.58755	3.91e-07	2.38e-05	down
Novel_014787	XLOC_160963	.	-22.0606	3.24e-13	3.87e-11	down
Novel_014798	XLOC_162134	.	-1.51907	2.5e-08	1.57e-06	down
Novel_014942	XLOC_163510	.	6.5681	0.000143636	0.00666835	up
Novel_014972	XLOC_164014	.	9.11038	0.000281429	0.0120757	up
Novel_015030	XLOC_164233	.	22.0867	2.99e-13	3.61e-11	up
Novel_015035	XLOC_164233	.	10.2086	0.000743341	0.028193	up
Novel_015036	XLOC_164233	.	-22.8105	4.91e-14	9.05e-12	down
Novel_015071	XLOC_164420	.	-22.9276	3.64e-14	7.59e-12	down
Novel_015072	XLOC_164420	.	-2.86874	5.79e-07	3.49e-05	down
Novel_015096	XLOC_164607	.	1.23203	0.00031422	0.0133384	up
Novel_015100	XLOC_164844	.	3.17069	0.000234541	0.0103228	up
Novel_015103	XLOC_164932	.	-24.2906	1.01e-15	6.43e-13	down
Novel_015111	XLOC_165072	.	-22.1062	2.86e-13	3.48e-11	down
Novel_015113	XLOC_165072	.	-21.7212	7.47e-13	7.47e-11	down
Novel_015118	XLOC_165072	.	21.7065	7.6e-13	7.56e-11	up
Novel_015145	XLOC_165611	.	-22.9877	3.08e-14	6.79e-12	down
Novel_015148	XLOC_165611	.	21.786	6.26e-13	6.63e-11	up
Novel_015199	XLOC_166207	.	20.7364	7.73e-12	5.44e-10	up
Novel_015240	XLOC_166678	.	22.3228	1.66e-13	2.29e-11	up
Novel_015249	XLOC_166692	.	-21.1852	2.74e-12	2.11e-10	down
Novel_015288	XLOC_166981	.	-23.2675	1.52e-14	4.28e-12	down
Novel_015309	XLOC_167456	.	-2.54243	0.00107668	0.0385876	down
Novel_015389	XLOC_169098	.	23.1758	1.91e-14	4.87e-12	up
Novel_015397	XLOC_169098	.	7.50426	0.00124246	0.0433362	up
Novel_015407	XLOC_169145	.	-22.4577	1.2e-13	1.8e-11	down
Novel_015458	XLOC_169536	.	22.3084	1.72e-13	2.36e-11	up
Novel_015507	XLOC_169745	.	20.4431	1.53e-11	1.03e-09	up
Novel_015583	XLOC_170084	.	2.16617	1.57e-08	9.89e-07	up
Novel_015625	XLOC_170387	.	-22.5441	9.65e-14	1.5e-11	down
Novel_015687	XLOC_170598	.	22.5341	9.79e-14	1.51e-11	up
Novel_015691	XLOC_170662	.	-8.3972	0.000724935	0.0275909	down
Novel_015696	XLOC_170662	.	-21.8881	4.96e-13	5.47e-11	down
Novel_015697	XLOC_170662	.	-3.39514	0.00090946	0.0336307	down
Novel_015717	XLOC_170728	.	-22.6119	8.13e-14	1.31e-11	down
Novel_015739	XLOC_170982	.	-21.7782	6.49e-13	6.84e-11	down
Novel_015758	XLOC_171434	.	-23.376	1.14e-14	3.57e-12	down
Novel_015876	XLOC_172825	.	8.26546	0.000827622	0.0309588	up
Novel_015942	XLOC_173222	.	22.5254	1e-13	1.54e-11	up
Novel_015949	XLOC_173265	.	9.58363	0.000139205	0.00647986	up
Novel_015958	XLOC_173265	.	6.39432	0.000115691	0.00546106	up
Novel_015963	XLOC_173291	.	5.1818	0.000561021	0.0219953	up
Novel_015989	XLOC_173393	.	-8.68398	5.21e-07	3.15e-05	down
Novel_016051	XLOC_173730	.	-24.7284	3.07e-16	2.65e-13	down
Novel_016053	XLOC_173730	.	24.0081	2.15e-15	1.08e-12	up
Novel_016096	XLOC_174055	.	-26.7199	1.05e-18	4.84e-15	down
Novel_016109	XLOC_174071	.	-21.3938	1.66e-12	1.4e-10	down
Novel_016133	XLOC_174126	.	-23.0359	2.76e-14	6.45e-12	down
Novel_016135	XLOC_174126	.	-23.0217	2.86e-14	6.53e-12	down
Novel_016141	XLOC_174126	.	23.9113	2.78e-15	1.31e-12	up
Novel_016185	XLOC_174269	.	9.54062	0.000951129	0.0348466	up
Novel_016236	XLOC_174607	.	3.74383	0.000919299	0.0339294	up
Novel_016278	XLOC_175112	.	3.61358	3.97e-08	2.48e-06	up
Novel_016302	XLOC_175116	.	21.5054	1.24e-12	1.13e-10	up
Novel_016303	XLOC_175116	.	-22.3823	1.45e-13	2.08e-11	down
Novel_016339	XLOC_175277	.	23.1856	1.86e-14	4.79e-12	up
Novel_016343	XLOC_175277	.	-23.1617	1.99e-14	5.04e-12	down
Novel_016354	XLOC_175346	.	23.8181	3.56e-15	1.58e-12	up
Novel_016442	XLOC_175825	.	20.9444	4.69e-12	3.46e-10	up
Novel_016445	XLOC_175831	.	22.6173	7.94e-14	1.29e-11	up
Novel_016476	XLOC_175980	.	-7.60406	0.000103918	0.00494547	down
Novel_016489	XLOC_176059	.	-21.9834	3.91e-13	4.47e-11	down
Novel_016520	XLOC_176467	.	1.16382	0.000783542	0.0295124	up
Novel_016526	XLOC_176512	.	-21.5082	1.26e-12	1.14e-10	down
Novel_016553	XLOC_176565	.	-22.1798	2.41e-13	3.03e-11	down
Novel_016582	XLOC_176710	.	21.2299	2.4e-12	1.9e-10	up
Novel_016620	XLOC_177005	.	-23.8582	3.21e-15	1.47e-12	down
Novel_016623	XLOC_177005	.	21.4575	1.39e-12	1.22e-10	up
Novel_016632	XLOC_177005	.	6.05019	3.8e-10	2.46e-08	up
Novel_016634	XLOC_177058	.	-26.4853	2.1e-18	8.33e-15	down
Novel_016647	XLOC_177089	.	20.9603	4.56e-12	3.38e-10	up
Novel_016658	XLOC_177139	.	8.56652	0.000400308	0.01649	up
Novel_016664	XLOC_177181	.	23.6138	6.1e-15	2.29e-12	up
Novel_016667	XLOC_177181	.	-24.7169	3.17e-16	2.71e-13	down
Novel_016686	XLOC_177262	.	22.4842	1.11e-13	1.68e-11	up
Novel_016718	XLOC_177462	.	9.10292	0.000309151	0.0131488	up
Novel_016742	XLOC_177543	.	21.5787	1.04e-12	9.68e-11	up
Novel_016756	XLOC_177620	.	-23.0901	2.4e-14	5.88e-12	down
Novel_016761	XLOC_177620	.	22.2952	1.78e-13	2.41e-11	up
Novel_016766	XLOC_177654	.	20.6866	8.69e-12	6.05e-10	up
Novel_016786	XLOC_177691	.	-22.1506	2.59e-13	3.21e-11	down
Novel_016788	XLOC_177691	.	22.5587	9.2e-14	1.45e-11	up
Novel_016796	XLOC_177819	.	-22.9231	3.68e-14	7.65e-12	down
Novel_016868	XLOC_178468	.	22.4568	1.18e-13	1.77e-11	up
Novel_016884	XLOC_178578	.	-24.4086	7.34e-16	5.13e-13	down
Novel_016947	XLOC_179160	.	21.6671	8.36e-13	8.15e-11	up
Novel_016967	XLOC_179370	.	-25.9665	9.47e-18	2.01e-14	down
Novel_017078	XLOC_179779	.	20.9492	4.68e-12	3.46e-10	up
Novel_017084	XLOC_179826	.	-23.0195	2.87e-14	6.53e-12	down
Novel_017112	XLOC_180012	.	22.7203	6.12e-14	1.07e-11	up
Novel_017115	XLOC_180012	.	-1.45037	0.000925711	0.0340652	down
Novel_017189	XLOC_180637	.	5.88047	2.7e-05	0.00142653	up
Novel_017204	XLOC_180707	.	7.71556	9.03e-06	0.000503059	up
Novel_017224	XLOC_180865	.	5.34485	1.14e-07	7.07e-06	up
Novel_017280	XLOC_181314	.	-21.9692	4.06e-13	4.61e-11	down
Novel_017297	XLOC_181409	.	-26.4696	2.2e-18	8.34e-15	down
Novel_017324	XLOC_181492	.	-9.69124	5.45e-06	0.000309922	down
Novel_017400	XLOC_182271	.	6.714	0.000496983	0.0199051	up
Novel_017408	XLOC_182558	.	8.46221	2.71e-07	1.66e-05	up
Novel_017471	XLOC_183082	.	-23.2634	1.53e-14	4.3e-12	down
Novel_017480	XLOC_183082	.	20.4712	1.44e-11	9.65e-10	up
Novel_017550	XLOC_184526	.	-24.2441	1.15e-15	6.92e-13	down
Novel_017551	XLOC_184526	.	-21.5076	1.26e-12	1.14e-10	down
Novel_017585	XLOC_185034	.	9.52711	1.94e-05	0.00104496	up
Novel_017657	XLOC_186296	.	-2.47005	0.00121544	0.0426322	down
Novel_017686	XLOC_186733	.	0.791445	0.000279522	0.0120294	up
Novel_017755	XLOC_187486	.	22.3519	1.55e-13	2.18e-11	up
Novel_017762	XLOC_187646	.	1.27426	3.04e-05	0.00159176	up
Novel_017764	XLOC_187647	.	21.244	2.32e-12	1.85e-10	up
Novel_017773	XLOC_187689	.	23.0864	2.4e-14	5.88e-12	up
Novel_017776	XLOC_187689	.	-6.59553	2.64e-06	0.000154359	down
Novel_017792	XLOC_188039	.	-8.53793	4.02e-06	0.000231255	down
Novel_017796	XLOC_188039	.	-23.5666	6.94e-15	2.48e-12	down
Novel_017817	XLOC_188067	.	-22.9241	3.67e-14	7.64e-12	down
Novel_017818	XLOC_188067	.	-21.6115	9.77e-13	9.23e-11	down
Novel_017822	XLOC_188067	.	23.5084	8.04e-15	2.74e-12	up
Novel_017825	XLOC_188067	.	23.6401	5.67e-15	2.22e-12	up
Novel_017827	XLOC_188067	.	-22.6212	7.94e-14	1.29e-11	down
Novel_017832	XLOC_188067	.	-22.8105	4.91e-14	9.05e-12	down
Novel_017835	XLOC_188067	.	-24.492	5.86e-16	4.48e-13	down
Novel_017841	XLOC_188067	.	21.1707	2.76e-12	2.12e-10	up
Novel_017848	XLOC_188067	.	-22.6409	7.55e-14	1.25e-11	down
Novel_017851	XLOC_188067	.	-23.1879	1.86e-14	4.79e-12	down
Novel_017855	XLOC_188067	.	-23.8069	3.68e-15	1.61e-12	down
Novel_017858	XLOC_188067	.	-23.1044	2.31e-14	5.72e-12	down
Novel_017948	XLOC_189064	.	-0.850172	0.000345413	0.0145492	down
Novel_017949	XLOC_189064	.	-22.8659	4.26e-14	8.3e-12	down
Novel_017962	XLOC_189098	.	23.647	5.59e-15	2.2e-12	up
Novel_017982	XLOC_189168	.	-21.2299	2.46e-12	1.93e-10	down
Novel_018016	XLOC_189506	.	-23.0316	2.79e-14	6.49e-12	down
Novel_018017	XLOC_189506	.	-22.8648	4.27e-14	8.3e-12	down
Novel_018018	XLOC_189506	.	-24.2808	1.03e-15	6.49e-13	down
Novel_018021	XLOC_189532	.	21.5794	1.03e-12	9.68e-11	up
Novel_018037	XLOC_189636	.	-21.7662	6.69e-13	6.99e-11	down
Novel_018158	XLOC_190830	.	20.2105	2.63e-11	1.72e-09	up
Novel_018182	XLOC_191038	.	20.7522	7.45e-12	5.26e-10	up
Novel_018207	XLOC_191375	.	-24.3462	8.69e-16	5.88e-13	down
Novel_018210	XLOC_191395	.	22.2049	2.23e-13	2.88e-11	up
Novel_018279	XLOC_192462	.	21.3349	1.86e-12	1.54e-10	up
Novel_018312	XLOC_192632	.	5.30954	0.00012779	0.0059772	up
Novel_018324	XLOC_192793	.	-21.708	7.71e-13	7.66e-11	down
Novel_018375	XLOC_193387	.	-21.4099	1.6e-12	1.36e-10	down
Novel_018440	XLOC_194542	.	21.343	1.83e-12	1.53e-10	up
Novel_018441	XLOC_194542	.	21.1051	3.23e-12	2.46e-10	up
Novel_018457	XLOC_194594	.	3.86501	0.000919129	0.0339294	up
Novel_018461	XLOC_194641	.	22.698	6.47e-14	1.11e-11	up
Novel_018494	XLOC_194769	.	21.0409	3.77e-12	2.84e-10	up
Novel_018499	XLOC_194799	.	-24.3335	9e-16	5.96e-13	down
Novel_018504	XLOC_194799	.	-22.1491	2.6e-13	3.22e-11	down
Novel_018505	XLOC_194799	.	-21.2726	2.22e-12	1.78e-10	down
Novel_018509	XLOC_194919	.	7.67293	0.000548813	0.0215846	up
Novel_018513	XLOC_194919	.	21.7396	7.01e-13	7.2e-11	up
Novel_018529	XLOC_195334	.	1.92043	0.000153982	0.00710329	up
Novel_018536	XLOC_195340	.	-22.8667	4.25e-14	8.3e-12	down
Novel_018554	XLOC_195871	.	1.57157	0.00117987	0.0416526	up
Novel_018576	XLOC_195930	.	-8.814	0.000503423	0.0201261	down
Novel_018578	XLOC_195930	.	25.0343	1.32e-16	1.49e-13	up
Novel_018581	XLOC_195930	.	9.8875	0.000105789	0.00502631	up
Novel_018583	XLOC_195930	.	10.0055	0.000107967	0.00511863	up
Novel_018585	XLOC_195930	.	20.9511	4.66e-12	3.45e-10	up
Novel_018588	XLOC_195930	.	22.772	5.33e-14	9.66e-12	up
Novel_018589	XLOC_195930	.	21.4346	1.43e-12	1.25e-10	up
Novel_018590	XLOC_195930	.	23.0891	2.39e-14	5.88e-12	up
Novel_018595	XLOC_195930	.	-23.5655	6.96e-15	2.48e-12	down
Novel_018598	XLOC_195930	.	-25.6388	2.42e-17	4.38e-14	down
Novel_018599	XLOC_195930	.	-11.2	5.54e-05	0.00276941	down
Novel_018601	XLOC_195930	.	-23.0629	2.57e-14	6.18e-12	down
Novel_018603	XLOC_195930	.	9.97333	0.000983271	0.0358736	up
Novel_018607	XLOC_195930	.	23.2334	1.64e-14	4.36e-12	up
Novel_018617	XLOC_195930	.	-24.4137	7.24e-16	5.12e-13	down
Novel_018618	XLOC_195930	.	-23.9463	2.54e-15	1.23e-12	down
Novel_018619	XLOC_195930	.	-24.3272	9.15e-16	5.99e-13	down
Novel_018624	XLOC_195930	.	25.1995	8.31e-17	1.08e-13	up
Novel_018696	XLOC_197388	.	-22.0154	3.62e-13	4.23e-11	down
Novel_018711	XLOC_197554	.	21.6137	9.52e-13	9.08e-11	up
Novel_018717	XLOC_197565	.	5.72994	0.00125402	0.0436519	up
Novel_018747	XLOC_197620	.	-6.71023	3.93e-05	0.00202954	down
Novel_018770	XLOC_197672	.	8.00579	0.000952893	0.0348966	up
Novel_018849	XLOC_198188	.	-21.7679	6.66e-13	6.97e-11	down
Novel_018878	XLOC_198531	.	-24.7326	3.03e-16	2.65e-13	down
Novel_018926	XLOC_198715	.	-7.3181	0.00010879	0.00514927	down
Novel_018967	XLOC_198963	.	7.45778	1.4e-05	0.000768198	up
Novel_018987	XLOC_199688	.	21.4219	1.51e-12	1.3e-10	up
Novel_019029	XLOC_200041	.	-4.24177	0.000876601	0.0325953	down
Novel_019061	XLOC_200273	.	-21.7654	6.7e-13	6.99e-11	down
Novel_019078	XLOC_200363	.	4.67998	0.00133838	0.0460997	up
Novel_019097	XLOC_200397	.	-1.82703	0.0010867	0.0389307	down
Novel_019140	XLOC_200467	.	-7.83322	0.00136031	0.0467916	down
Novel_019141	XLOC_200467	.	-21.1939	2.69e-12	2.08e-10	down
Novel_019154	XLOC_200491	.	-9.07942	2.02e-09	1.3e-07	down
Novel_019193	XLOC_200687	.	4.33061	0.000204947	0.00918711	up
Novel_019237	XLOC_200958	.	9.55554	1.24e-16	1.42e-13	up
Novel_019272	XLOC_201498	.	-22.7051	6.34e-14	1.1e-11	down
Novel_019299	XLOC_202160	.	4.53	6.08e-06	0.000343299	up
Novel_019311	XLOC_202160	.	4.74111	3e-05	0.0015738	up
Novel_019313	XLOC_202160	.	-4.35991	0.000586348	0.0228854	down
Novel_019353	XLOC_202584	.	-23.5518	7.22e-15	2.55e-12	down
Novel_019368	XLOC_202601	.	10.1856	6.14e-05	0.00304795	up
Novel_019373	XLOC_202601	.	22.1582	2.5e-13	3.12e-11	up
Novel_019397	XLOC_202796	.	-8.99553	0.000346969	0.0145866	down
Novel_019405	XLOC_202796	.	-22.6926	6.63e-14	1.13e-11	down
Novel_019409	XLOC_202796	.	23.8921	2.93e-15	1.36e-12	up
Novel_019419	XLOC_202796	.	20.647	9.53e-12	6.58e-10	up
Novel_019424	XLOC_202796	.	20.8899	5.39e-12	3.91e-10	up
Novel_019455	XLOC_202951	.	3.18578	0.000317949	0.0134835	up
Novel_019456	XLOC_202951	.	9.67326	0.000109848	0.00519368	up
Novel_019473	XLOC_202982	.	-24.7925	2.57e-16	2.31e-13	down
Novel_019531	XLOC_203531	.	-6.12193	0.00116782	0.041311	down
Novel_019538	XLOC_203623	.	-21.4181	1.56e-12	1.34e-10	down
Novel_019547	XLOC_203689	.	20.9069	5.17e-12	3.77e-10	up
Novel_019611	XLOC_204063	.	23.3266	1.29e-14	3.9e-12	up
Novel_019620	XLOC_204063	.	-24.4006	7.5e-16	5.19e-13	down
Novel_019633	XLOC_204288	.	-21.708	7.71e-13	7.66e-11	down
Novel_019664	XLOC_204742	.	20.8265	6.25e-12	4.48e-10	up
Novel_019678	XLOC_205010	.	23.4097	1.04e-14	3.36e-12	up
Novel_019685	XLOC_205050	.	20.6169	1.02e-11	7.03e-10	up
Novel_019692	XLOC_205058	.	23.5595	7.03e-15	2.49e-12	up
Novel_019703	XLOC_205408	.	-24.049	1.93e-15	1.01e-12	down
Novel_019705	XLOC_205408	.	-22.8921	3.99e-14	8.01e-12	down
Novel_019707	XLOC_205413	.	-23.2955	1.4e-14	4.03e-12	down
Novel_019709	XLOC_205413	.	-6.92273	0.000146219	0.00677741	down
Novel_019730	XLOC_205513	.	-22.7415	5.85e-14	1.04e-11	down
Novel_019745	XLOC_205770	.	22.9891	3.08e-14	6.79e-12	up
Novel_019746	XLOC_205770	.	23.4819	5.78e-16	4.46e-13	up
Novel_019747	XLOC_205770	.	-6.11662	0.00027754	0.0119559	down
Novel_019761	XLOC_205797	.	22.5482	9.45e-14	1.48e-11	up
Novel_019777	XLOC_205857	.	6.76644	6.63e-09	4.22e-07	up
Novel_019783	XLOC_205908	.	2.28638	0.00113969	0.0405293	up
Novel_019798	XLOC_206050	.	-21.4646	1.4e-12	1.23e-10	down
Novel_019799	XLOC_206056	.	20.8472	5.96e-12	4.28e-10	up
Novel_019831	XLOC_206266	.	3.93618	6.42e-12	4.59e-10	up
Novel_019852	XLOC_206411	.	21.9038	4.69e-13	5.23e-11	up
Novel_019856	XLOC_206424	.	20.652	9.42e-12	6.52e-10	up
Novel_019897	XLOC_206803	.	21.27	2.18e-12	1.76e-10	up
Novel_019902	XLOC_206873	.	-21.4663	1.39e-12	1.22e-10	down
Novel_019942	XLOC_207045	.	23.2357	1.63e-14	4.36e-12	up
Novel_019956	XLOC_207539	.	-24.173	1.38e-15	7.88e-13	down
Novel_019964	XLOC_207539	.	-21.4275	1.48e-12	1.29e-10	down
Novel_019966	XLOC_207539	.	-23.2357	1.65e-14	4.36e-12	down
Novel_019976	XLOC_207539	.	-23.2497	1.59e-14	4.36e-12	down
Novel_019983	XLOC_207560	.	20.3854	1.75e-11	1.16e-09	up
Novel_020110	XLOC_209179	.	-21.3595	1.8e-12	1.51e-10	down
Novel_020114	XLOC_209179	.	3.42163	0.000460384	0.018636	up
Novel_020117	XLOC_209247	.	-21.1618	2.9e-12	2.22e-10	down
Novel_020188	XLOC_209823	.	-21.9667	4.07e-13	4.62e-11	down
Novel_020272	XLOC_210455	.	-23.4609	9.16e-15	3.06e-12	down
Novel_020303	XLOC_210471	.	-23.7415	4.38e-15	1.84e-12	down
Novel_020305	XLOC_210471	.	-23.5869	6.58e-15	2.4e-12	down
Novel_020385	XLOC_211271	.	-21.5076	1.26e-12	1.14e-10	down
Novel_020404	XLOC_211620	.	-22.7388	5.89e-14	1.04e-11	down
Novel_020530	XLOC_213077	.	21.4731	1.34e-12	1.19e-10	up
Novel_020532	XLOC_213077	.	-22.6023	8.33e-14	1.34e-11	down
Novel_020541	XLOC_213137	.	20.7748	7.06e-12	5.01e-10	up
Novel_020595	XLOC_213540	.	20.4559	1.49e-11	9.97e-10	up
Novel_020600	XLOC_213556	.	1.15559	0.000783099	0.0295085	up
Novel_020618	XLOC_213586	.	-23.415	1.03e-14	3.36e-12	down
Novel_020621	XLOC_213586	.	-23.3478	1.23e-14	3.79e-12	down
Novel_020624	XLOC_213586	.	-22.8921	3.99e-14	8.01e-12	down
Novel_020639	XLOC_213632	.	21.1953	2.61e-12	2.02e-10	up
Novel_020676	XLOC_213952	.	21.2634	2.22e-12	1.78e-10	up
Novel_020765	XLOC_214467	.	-9.68262	7.47e-07	4.49e-05	down
Novel_020913	XLOC_215223	.	-22.3085	1.74e-13	2.38e-11	down
Novel_020917	XLOC_215327	.	-21.7414	7.11e-13	7.29e-11	down
Novel_020931	XLOC_215397	.	21.7087	7.56e-13	7.54e-11	up
Novel_020934	XLOC_215407	.	5.00687	5.21e-05	0.00263353	up
Novel_020955	XLOC_215640	.	20.3243	2.02e-11	1.33e-09	up
Novel_021184	XLOC_216908	.	-5.51344	0.000914995	0.0338211	down
Novel_021197	XLOC_217002	.	-21.6843	8.18e-13	7.99e-11	down
Novel_021206	XLOC_217132	.	-21.87	5.18e-13	5.66e-11	down
Novel_021261	XLOC_217649	.	-23.0705	2.52e-14	6.09e-12	down
Novel_021270	XLOC_218024	.	1.70115	0.000229742	0.0101474	up
Novel_021275	XLOC_218038	.	-7.21739	4.48e-05	0.00229887	down
Novel_021276	XLOC_218038	.	-4.01701	0.000780487	0.0294355	down
Novel_021281	XLOC_218038	.	1.51835	1.87e-06	0.000110786	up
Novel_021282	XLOC_218038	.	-2.91424	0.001118	0.0398882	down
Novel_021295	XLOC_218113	.	-21.2299	2.46e-12	1.93e-10	down
Novel_021328	XLOC_218198	.	-22.5759	8.91e-14	1.41e-11	down
Novel_021393	XLOC_218945	.	-21.4797	1.35e-12	1.2e-10	down
Novel_021467	XLOC_219504	.	22.0268	3.46e-13	4.09e-11	up
Novel_021492	XLOC_219883	.	-7.73658	5.46e-06	0.000310093	down
Novel_021554	XLOC_220610	.	-22.193	2.33e-13	2.96e-11	down
Novel_021609	XLOC_221676	.	24.3321	9e-16	5.96e-13	up
Novel_021612	XLOC_221676	.	24.0708	1.82e-15	9.62e-13	up
Novel_021618	XLOC_221848	.	20.8341	6.14e-12	4.4e-10	up
Novel_021619	XLOC_221848	.	21.7533	6.78e-13	7.02e-11	up
Novel_021636	XLOC_221964	.	-22.0088	3.68e-13	4.28e-11	down
Novel_021698	XLOC_223217	.	-4.75998	0.00101395	0.0368234	down
Novel_021708	XLOC_223290	.	4.94471	0.000431336	0.017632	up
Novel_021740	XLOC_223750	.	-7.46504	0.000502819	0.0201111	down
Novel_021741	XLOC_223767	.	-8.12994	7.52e-05	0.00367613	down
Novel_021761	XLOC_223962	.	20.7273	7.9e-12	5.54e-10	up
Novel_021822	XLOC_224103	.	-24.2614	1.09e-15	6.76e-13	down
Novel_021912	XLOC_225626	.	20.1188	3.25e-11	2.12e-09	up
Novel_021915	XLOC_225627	.	1.20123	0.00120302	0.0422648	up
Novel_021966	XLOC_226013	.	22.8841	4.03e-14	8.09e-12	up
Novel_021969	XLOC_226796	.	-24.489	5.9e-16	4.48e-13	down
Novel_022011	XLOC_227552	.	-6.04721	0.000817124	0.0306186	down
Novel_022022	XLOC_227697	.	-23.1626	1.99e-14	5.04e-12	down
Novel_022069	XLOC_228156	.	22.1987	2.26e-13	2.91e-11	up
Novel_022092	XLOC_228156	.	21.444	1.44e-12	1.25e-10	up
Novel_022097	XLOC_228187	.	8.68919	0.000513513	0.0204265	up
Novel_022160	XLOC_229303	.	22.1223	2.74e-13	3.37e-11	up
Novel_022242	XLOC_230400	.	-21.4458	1.46e-12	1.27e-10	down
Novel_022243	XLOC_230400	.	-21.2453	2.37e-12	1.88e-10	down
Novel_022283	XLOC_231184	.	-22.25	2.02e-13	2.65e-11	down
Novel_022285	XLOC_231184	.	22.0463	3.3e-13	3.93e-11	up
Novel_022306	XLOC_231286	.	-23.5803	6.68e-15	2.42e-12	down
Novel_022328	XLOC_231484	.	21.0051	4.1e-12	3.07e-10	up
Novel_022333	XLOC_231484	.	23.6554	5.47e-15	2.16e-12	up
Novel_022334	XLOC_231484	.	23.6051	6.24e-15	2.34e-12	up
Novel_022347	XLOC_231578	.	20.3896	1.65e-11	1.1e-09	up
Novel_022376	XLOC_232196	.	-3.60167	0.000302965	0.0129172	down
Novel_022399	XLOC_232273	.	-22.2761	1.89e-13	2.5e-11	down
Novel_022457	XLOC_233935	.	22.8614	4.26e-14	8.3e-12	up
Novel_022458	XLOC_233935	.	22.8922	3.94e-14	8.01e-12	up
Novel_022459	XLOC_233935	.	23.7029	4.83e-15	1.95e-12	up
Novel_022463	XLOC_233935	.	22.7922	5.1e-14	9.34e-12	up
Novel_022474	XLOC_234071	.	23.0776	2.46e-14	5.95e-12	up
Novel_022475	XLOC_234071	.	20.8737	5.6e-12	4.05e-10	up
Novel_022485	XLOC_234071	.	-4.99029	3.84e-05	0.00198863	down
Novel_022497	XLOC_234217	.	1.13069	0.00062009	0.0239984	up
Novel_022524	XLOC_234217	.	-21.2392	2.41e-12	1.91e-10	down
Novel_022562	XLOC_234217	.	-21.6712	8.44e-13	8.2e-11	down
Novel_022563	XLOC_234217	.	-21.5931	1.02e-12	9.59e-11	down
Novel_022570	XLOC_234231	.	9.31127	0.000214034	0.00952593	up
Novel_022590	XLOC_234313	.	22.1054	2.85e-13	3.48e-11	up
Novel_022595	XLOC_234361	.	21.9072	4.65e-13	5.19e-11	up
Novel_022599	XLOC_234361	.	-23.5456	7.33e-15	2.56e-12	down
Novel_022631	XLOC_234424	.	21.4203	1.52e-12	1.31e-10	up
Novel_022655	XLOC_234521	.	7.78175	0.00139391	0.0475353	up
Novel_022672	XLOC_234588	.	-23.0023	3e-14	6.67e-12	down
Novel_022674	XLOC_234588	.	-21.7134	7.47e-13	7.47e-11	down
Novel_022682	XLOC_234654	.	1.1509	0.000803706	0.0301956	up
Novel_022732	XLOC_235289	.	20.5684	1.15e-11	7.76e-10	up
Novel_022753	XLOC_235560	.	-23.3001	1.39e-14	4.03e-12	down
Novel_022822	XLOC_236376	.	4.37638	0.000146506	0.00678636	up
Novel_022876	XLOC_236721	.	-6.753	4.56e-05	0.00233931	down
Novel_022877	XLOC_236721	.	-6.31183	0.000567323	0.0222324	down
Novel_022916	XLOC_236870	.	-23.0169	2.89e-14	6.53e-12	down
Novel_022920	XLOC_236953	.	-23.7165	4.68e-15	1.9e-12	down
Novel_022933	XLOC_236998	.	21.9806	3.88e-13	4.47e-11	up
Novel_022937	XLOC_237012	.	-4.03523	0.000207559	0.00928991	down
Novel_023000	XLOC_237999	.	20.6805	8.82e-12	6.12e-10	up
Novel_023012	XLOC_238161	.	8.05261	0.00099306	0.0361551	up
Novel_023015	XLOC_238232	.	7.16087	1.86e-06	0.000109892	up
Novel_023020	XLOC_238232	.	-23.9202	2.73e-15	1.3e-12	down
Novel_023045	XLOC_238816	.	8.70265	0.000727614	0.0276807	up
Novel_023067	XLOC_239348	.	22.5039	1.06e-13	1.61e-11	up
Novel_023069	XLOC_239348	.	-23.6295	5.88e-15	2.24e-12	down
Novel_023085	XLOC_239670	.	21.6112	9.55e-13	9.09e-11	up
Novel_023100	XLOC_240107	.	-21.7358	7.2e-13	7.37e-11	down
Novel_023108	XLOC_240136	.	21.5786	1.04e-12	9.68e-11	up
Novel_023155	XLOC_240712	.	0.676061	0.000435376	0.0177722	up
Novel_023203	XLOC_240995	.	23.3326	1.27e-14	3.86e-12	up
Novel_023212	XLOC_241118	.	3.81176	0.000145995	0.00677064	up
Novel_023214	XLOC_241118	.	20.9955	4.19e-12	3.14e-10	up
Novel_023218	XLOC_241129	.	3.77074	0.000490658	0.019697	up
Novel_023232	XLOC_241361	.	21.4257	1.5e-12	1.3e-10	up
Novel_023322	XLOC_243531	.	-23.3478	1.23e-14	3.79e-12	down
Novel_023327	XLOC_243786	.	22.7154	6.19e-14	1.08e-11	up
Novel_023365	XLOC_244596	.	21.5117	1.22e-12	1.11e-10	up
Novel_023375	XLOC_244802	.	5.53548	3.9e-09	2.49e-07	up
Novel_023379	XLOC_244814	.	-23.5471	7.3e-15	2.56e-12	down
Novel_023380	XLOC_244814	.	-23.0452	2.69e-14	6.34e-12	down
Novel_023435	XLOC_245664	.	-2.79105	8.55e-07	5.13e-05	down
Novel_023442	XLOC_245704	.	-21.2392	2.41e-12	1.91e-10	down
Novel_023458	XLOC_246156	.	-22.8414	4.54e-14	8.7e-12	down
Novel_023538	XLOC_247224	.	20.1401	3.09e-11	2.02e-09	up
Novel_023743	XLOC_249107	.	-1.48284	1.3e-06	7.76e-05	down
Novel_023763	XLOC_249352	.	7.20423	6.21e-05	0.00308094	up
Novel_023767	XLOC_249424	.	1.23856	0.000813064	0.0304927	up
Novel_023790	XLOC_249841	.	7.08558	0.000125607	0.00589253	up
Novel_023835	XLOC_250106	.	-22.8483	4.45e-14	8.59e-12	down
Novel_023852	XLOC_250147	.	-24.325	9.21e-16	5.99e-13	down
Novel_023853	XLOC_250147	.	2.14223	0.000410502	0.0168515	up
Novel_023898	XLOC_250443	.	-24.2662	1.08e-15	6.72e-13	down
Novel_023905	XLOC_250555	.	21.2664	2.2e-12	1.77e-10	up
Novel_023913	XLOC_250609	.	-21.4376	1.49e-12	1.29e-10	down
Novel_023941	XLOC_250759	.	22.6231	7.78e-14	1.28e-11	up
Novel_023984	XLOC_251094	.	23.2071	1.76e-14	4.61e-12	up
Novel_024084	XLOC_252213	.	-21.6313	9.31e-13	8.92e-11	down
Novel_024107	XLOC_252494	.	3.72334	0.000250215	0.0109518	up
Novel_024118	XLOC_252623	.	20.7948	6.6e-12	4.71e-10	up
Novel_024128	XLOC_252708	.	20.9726	4.43e-12	3.29e-10	up
Novel_024138	XLOC_252841	.	-7.37305	0.000703701	0.0268647	down
Novel_024143	XLOC_252855	.	-7.69533	5.87e-05	0.00292138	down
Novel_024164	XLOC_252956	.	22.0258	3.47e-13	4.09e-11	up
Novel_024166	XLOC_252956	.	10.749	4.91e-05	0.0024988	up
Novel_024168	XLOC_252956	.	-23.0695	2.53e-14	6.09e-12	down
Novel_024203	XLOC_253624	.	-22.8105	4.91e-14	9.05e-12	down
Novel_024232	XLOC_254062	.	-22.6959	6.57e-14	1.12e-11	down
Novel_024243	XLOC_254251	.	-21.6703	8.46e-13	8.2e-11	down
Novel_024270	XLOC_254569	.	-8.15275	0.00106138	0.0381646	down
Novel_024271	XLOC_254569	.	21.0798	3.43e-12	2.6e-10	up
Novel_024314	XLOC_255351	.	-22.903	3.88e-14	7.95e-12	down
Novel_024355	XLOC_255908	.	-25.3488	5.48e-17	7.71e-14	down
Novel_024356	XLOC_255908	.	-21.3268	1.95e-12	1.61e-10	down
Novel_024358	XLOC_255909	.	-22.0986	2.94e-13	3.57e-11	down
XM_005691340.3	gene-AACS	AACS	-0.521107	0.000522567	0.0207111	down
XM_018055457.1	gene-AAK1	AAK1	-21.9673	4.08e-13	4.62e-11	down
XM_018063622.1	gene-AATK	AATK	-22.6417	7.54e-14	1.25e-11	down
XM_018064856.1	gene-ABCC3	ABCC3	-0.817173	5.15e-05	0.00260714	down
XM_013964130.2	gene-ABCC5	ABCC5	4.54262	0.00140375	0.0478146	up
XM_005679657.3	gene-ABCF2	ABCF2	8.42359	4.32e-07	2.62e-05	up
XM_018046710.1	gene-ABCF2	ABCF2	-0.388194	0.000658747	0.0253147	down
XM_018051686.1	gene-ABCG1	ABCG1	-1.2926	0.00127582	0.0441815	down
XM_018051689.1	gene-ABCG1	ABCG1	-1.34677	0.000219781	0.00974691	down
XM_013974524.2	gene-ABI3BP	ABI3BP	-22.6964	6.56e-14	1.12e-11	down
XM_013974705.2	gene-ABI3BP	ABI3BP	-23.3041	1.38e-14	4.03e-12	down
XM_005693833.3	gene-ACLY	ACLY	-0.459526	0.00119431	0.0420432	down
XM_018046218.1	gene-ADAM15	ADAM15	3.36158	0.000124453	0.00584307	up
XM_018047060.1	gene-ADAM22	ADAM22	5.95024	0.00101809	0.0369125	up
XM_005695760.3	gene-ADAMTS9	ADAMTS9	-23.2326	1.64e-14	4.36e-12	down
XM_018046038.1	gene-ADAMTSL4	ADAMTSL4	7.19628	0.000752308	0.0285083	up
XM_018046041.1	gene-ADAMTSL4	ADAMTSL4	20.6249	1e-11	6.91e-10	up
XM_018064258.1	gene-ADAP2	ADAP2	23.0231	2.81e-14	6.49e-12	up
XM_005696386.3	gene-ADGRF2	ADGRF2	-6.2755	0.000729835	0.0277531	down
XM_018062045.1	gene-ADGRG1	ADGRG1	-3.92921	6.43e-05	0.00317627	down
XM_018043947.1	gene-ADGRG2	ADGRG2	21.2664	2.2e-12	1.77e-10	up
NM_001287573.1	gene-ADIPOQ	ADIPOQ	5.63992	0.00102286	0.0370236	up
XM_005675149.3	gene-ADIPOQ	ADIPOQ	25.3339	5.71e-17	7.9e-14	up
XM_018058031.1	gene-ADNP	ADNP	-23.2437	1.6e-14	4.36e-12	down
XM_018058035.1	gene-ADNP	ADNP	-1.81217	0.00129405	0.0447305	down
XM_013962542.2	gene-ADORA3	ADORA3	0.950426	8.71e-05	0.00420565	up
XM_005681096.2	gene-ADSL	ADSL	-0.277923	0.00120356	0.0422667	down
XM_018066516.1	gene-AEN	AEN	5.83934	0.000126024	0.00590728	up
XM_018053470.1	gene-AFDN	AFDN	3.37773	0.000202643	0.00909319	up
XM_018049706.1	gene-AFF1	AFF1	-2.41403	0.000651015	0.0250728	down
XM_018046856.1	gene-AGK	AGK	-23.5175	7.89e-15	2.72e-12	down
XM_018038495.1	gene-AGPAT1	AGPAT1	-22.5402	9.62e-14	1.5e-11	down
XM_018045191.1	gene-AK4	AK4	10.0469	2.45e-07	1.5e-05	up
XM_005684250.3	gene-ALDOB	ALDOB	1.52468	0.000550315	0.0216339	up
XM_018056662.1	gene-ALG5	ALG5	20.8953	5.32e-12	3.87e-10	up
XM_018049217.1	gene-ALPK1	ALPK1	22.6547	7.22e-14	1.2e-11	up
XM_018049219.1	gene-ALPK1	ALPK1	-8.43982	0.00080355	0.0301956	down
XM_018049220.1	gene-ALPK1	ALPK1	9.5723	0.000125642	0.00589253	up
XM_018067204.1	gene-ALS2CL	ALS2CL	20.3993	1.62e-11	1.08e-09	up
XM_005689693.3	gene-AMPD3	AMPD3	-22.3738	1.46e-13	2.09e-11	down
XM_018063945.1	gene-AMZ2	AMZ2	-8.16165	9.11e-05	0.00438039	down
XM_018054805.1	gene-ANAPC1	ANAPC1	-23.3091	1.36e-14	3.99e-12	down
XM_013975359.2	gene-ANGPT2	ANGPT2	0.734811	0.000932415	0.0342329	up
XM_013963123.2	gene-ANKIB1	ANKIB1	22.436	1.24e-13	1.85e-11	up
XM_018046008.1	gene-ANKRD35	ANKRD35	21.2361	2.36e-12	1.88e-10	up
XM_018061363.1	gene-ANKRD44	ANKRD44	1.02179	0.00136985	0.0470458	up
XM_018038703.1	gene-ANKS1A	ANKS1A	6.74146	0.000670007	0.0257135	up
XM_018038704.1	gene-ANKS1A	ANKS1A	8.76616	0.00040725	0.0167495	up
XM_018042302.1	gene-ANXA11	ANXA11	-0.406526	4.69e-05	0.00239984	down
XM_018061021.1	gene-AP1B1	AP1B1	6.78779	2.66e-05	0.00140556	up
XM_013971270.2	gene-AP1G1	AP1G1	7.48377	2.22e-07	1.36e-05	up
XM_018062809.1	gene-AP2A1	AP2A1	8.56517	0.000148275	0.00686179	up
XM_013964000.2	gene-APAF1	APAF1	-25.6709	2.2e-17	4.18e-14	down
XM_018059459.1	gene-APBB1	APBB1	7.2843	4.79e-05	0.00244821	up
XM_018050281.1	gene-APBB3	APBB3	-6.1629	0.00119885	0.0421598	down
XM_018053745.1	gene-APC	APC	-28.6168	3.19e-21	4.21e-17	down
XM_018053747.1	gene-APC	APC	-23.9585	2.46e-15	1.2e-12	down
XM_018053748.1	gene-APC	APC	-7.72115	8.64e-07	5.18e-05	down
XM_005685408.3	gene-APEX1	APEX1	5.4644	4.95e-09	3.16e-07	up
XM_005675093.3	gene-APOD	APOD	1.22886	1.43e-05	0.000777953	up
XM_018059394.1	gene-ARAP1	ARAP1	-22.9062	3.84e-14	7.91e-12	down
XM_018064675.1	gene-ARHGAP44	ARHGAP44	-0.882727	0.000223764	0.00989839	down
XM_018048026.1	gene-ARHGAP9	ARHGAP9	-8.05906	4.88e-06	0.000279153	down
XM_018064623.1	gene-ARHGEF15	ARHGEF15	-25.2051	8.2e-17	1.08e-13	down
XM_018054534.1	gene-ARHGEF40	ARHGEF40	22.5518	9.36e-14	1.47e-11	up
XM_018042288.1	gene-ARID4B	ARID4B	3.28821	2.04e-05	0.00109566	up
XM_018042289.1	gene-ARID4B	ARID4B	-24.1636	1.42e-15	8e-13	down
XM_018042290.1	gene-ARID4B	ARID4B	-26.2278	4.45e-18	1.34e-14	down
XM_018058256.1	gene-ARMC9	ARMC9	9.93284	9.5e-05	0.00454656	up
XM_018044267.1	gene-ARMCX1	ARMCX1	-1.80078	0.000376896	0.0156636	down
XM_018066309.1	gene-ARNT2	ARNT2	-1.05494	4.11e-06	0.000235825	down
XM_018046244.1	gene-ASH1L	ASH1L	-1.22463	0.000950417	0.0348352	down
XM_018057736.1	gene-ASIP	ASIP	24.0013	2.18e-15	1.09e-12	up
XM_018066610.1	gene-ASPG	ASPG	21.1957	2.6e-12	2.02e-10	up
XM_018058473.1	gene-ASPH	ASPH	5.64531	3.13e-05	0.00163382	up
XM_018057698.1	gene-ASXL1	ASXL1	6.44166	0.00137414	0.0471004	up
XM_005686939.3	gene-ASXL2	ASXL2	-24.5149	5.5e-16	4.29e-13	down
XM_018058538.1	gene-ATAD2	ATAD2	20.6936	8.55e-12	5.97e-10	up
XM_018038916.1	gene-ATF6B	ATF6B	3.91998	0.000460953	0.0186504	up
XM_018045046.1	gene-ATG4C	ATG4C	-5.3162	0.000234254	0.0103153	down
XM_005675110.3	gene-ATP13A5	ATP13A5	5.10184	2.06e-05	0.00110971	up
XM_018055656.1	gene-ATP6V1C2	ATP6V1C2	-22.2878	1.84e-13	2.45e-11	down
XM_018049410.1	gene-ATP8A1	ATP8A1	25.5082	3.49e-17	5.63e-14	up
XM_018039527.1	gene-ATP9B	ATP9B	1.50241	1.16e-11	7.83e-10	up
XM_018038743.1	gene-ATXN1	ATXN1	4.50348	9.2e-08	5.71e-06	up
XM_018048901.1	gene-ATXN10	ATXN10	-0.220035	5.93e-06	0.000335062	down
XM_018061240.1	gene-ATXN2	ATXN2	23.7904	1.69e-16	1.69e-13	up
XM_018040189.1	gene-ATXN2L	ATXN2L	-23.1817	1.89e-14	4.84e-12	down
XM_018066395.1	gene-ATXN3	ATXN3	4.85519	0.000323876	0.0137149	up
XM_018040074.1	gene-AUTS2	AUTS2	-24.6921	3.38e-16	2.82e-13	down
XM_005697863.3	gene-AZGP1	AZGP1	-1.77985	1.33e-08	8.43e-07	down
XM_018042270.1	gene-B3GALNT2	B3GALNT2	-11.1092	4.38e-10	2.83e-08	down
NM_001285775.1	gene-B4GALT1	B4GALT1	-0.531859	3.55e-05	0.00184624	down
XM_018061837.1	gene-BANP	BANP	21.7717	6.47e-13	6.83e-11	up
XM_018038290.1	gene-BAP1	BAP1	-26.2206	4.55e-18	1.34e-14	down
XM_018048059.1	gene-BAZ2A	BAZ2A	-5.30517	0.000409523	0.0168271	down
XM_018063465.1	gene-BAZ2B	BAZ2B	-24.9524	1.66e-16	1.69e-13	down
XM_018047578.1	gene-BBS10	BBS10	1.11343	0.000164418	0.00752104	up
XM_018062007.1	gene-BBS2	BBS2	-0.444318	0.000915801	0.0338365	down
XM_018062653.1	gene-BBX	BBX	-2.89805	5.24e-05	0.00264461	down
XM_018058052.1	gene-BCAS1	BCAS1	20.652	9.42e-12	6.52e-10	up
XM_005693141.3	gene-BCAS3	BCAS3	4.00449	0.000207699	0.00929139	up
XM_013971822.2	gene-BCAS3	BCAS3	21.6771	8.16e-13	7.99e-11	up
XM_013971824.2	gene-BCAS3	BCAS3	24.0079	2.15e-15	1.08e-12	up
XM_018059698.1	gene-BCL9L	BCL9L	-23.7035	4.84e-15	1.95e-12	down
XM_018057124.1	gene-BEND7	BEND7	-21.5941	1e-12	9.45e-11	down
XM_018058458.1	gene-BHLHE22	BHLHE22	1.52482	0.00034962	0.0146768	up
XM_018061143.1	gene-BICDL1	BICDL1	21.1982	2.59e-12	2.02e-10	up
XM_018055092.1	gene-BIRC6	BIRC6	5.95857	2.7e-05	0.00142643	up
XM_018066593.1	gene-BNC1	BNC1	-0.622201	0.000112989	0.00533642	down
XM_018051934.1	gene-BNC2	BNC2	21.9251	4.41e-13	4.94e-11	up
XM_018046912.1	gene-BPGM	BPGM	-4.00928	0.00107655	0.0385876	down
XM_018061405.1	gene-BRI3BP	BRI3BP	-0.399923	0.00103017	0.037238	down
XM_005690501.3	gene-BROX	BROX	3.75441	0.000689948	0.0263859	up
XM_005676703.3	gene-BSDC1	BSDC1	20.6138	1.03e-11	7.07e-10	up
XM_018049746.1	gene-BST1	BST1	0.658362	1.24e-05	0.000685195	up
XM_005688172.2	gene-C13H20orf196	C13H20orf196	-21.6319	9.04e-13	8.71e-11	down
XM_005688339.3	gene-C13H20orf96	C13H20orf96	6.13373	0.000232929	0.0102622	up
XM_018060555.1	gene-C16H1orf159	C16H1orf159	6.32907	1.29e-05	0.000710536	up
XM_018060710.1	gene-C16H1orf21	C16H1orf21	0.56495	0.000921637	0.0339659	up
XM_018061353.1	gene-C17H12orf65	C17H12orf65	-4.73946	0.000526588	0.0208326	down
XM_018061532.1	gene-C17H4orf33	C17H4orf33	8.09043	5.46e-05	0.00274045	up
XM_018064219.1	gene-C19H17orf50	C19H17orf50	4.99965	6.4e-05	0.00316529	up
XM_005674686.3	gene-C1H21orf62	C1H21orf62	-5.89406	0.00138152	0.047242	down
XR_001917960.1	gene-C1H3orf70	C1H3orf70	-21.5973	1.01e-12	9.5e-11	down
XM_005688053.3	gene-C1QL3	C1QL3	2.42413	4.28e-06	0.000245276	up
XM_018050088.1	gene-C1QTNF2	C1QTNF2	6.87855	0.000400375	0.01649	up
XM_005681906.3	gene-C1QTNF7	C1QTNF7	2.57723	0.000596079	0.0232133	up
XM_013973852.2	gene-C23H6orf89	C23H6orf89	2.2741	0.000427628	0.0174969	up
XM_005698882.3	gene-C27H8orf4	C27H8orf4	0.849123	7.81e-05	0.00381016	up
XM_018049362.1	gene-C6H4orf19	C6H4orf19	-0.73656	0.000281215	0.0120742	down
XM_018052467.1	gene-C8H9orf3	C8H9orf3	0.359497	2.75e-06	0.000160689	up
XM_018052468.1	gene-C8H9orf3	C8H9orf3	22.5074	1.05e-13	1.6e-11	up
XM_018048693.1	gene-CACNA1C	CACNA1C	21.6237	9.29e-13	8.92e-11	up
XM_018048695.1	gene-CACNA1C	CACNA1C	9.9397	0.000156248	0.0071888	up
XM_018047657.1	gene-CALCOCO1	CALCOCO1	-4.99641	0.000123353	0.00579764	down
XM_005675875.3	gene-CALCRL	CALCRL	0.955154	0.00141022	0.0479736	up
XM_005682299.3	gene-CALR	CALR	-0.618496	0.000424562	0.0173795	down
XM_018049192.1	gene-CAMK2D	CAMK2D	2.43392	8.14e-05	0.0039524	up
XM_018060832.1	gene-CAMSAP2	CAMSAP2	8.25851	0.000167729	0.00765246	up
XM_018064485.1	gene-CAMTA2	CAMTA2	6.86573	0.000118441	0.00558183	up
XM_018064486.1	gene-CAMTA2	CAMTA2	23.4946	8.34e-15	2.81e-12	up
XM_018048350.1	gene-CAPRIN2	CAPRIN2	8.31873	0.000646125	0.0249065	up
XM_018050015.1	gene-CAST	CAST	2.83221	0.000840403	0.0313831	up
XM_018050019.1	gene-CAST	CAST	3.01342	0.000593266	0.0231141	up
XM_018060355.1	gene-CASZ1	CASZ1	-0.909589	0.00121343	0.0425788	down
XM_018061868.1	gene-CBFA2T3	CBFA2T3	21.6781	8.14e-13	7.99e-11	up
XM_018062444.1	gene-CBLB	CBLB	-23.2246	1.69e-14	4.47e-12	down
XM_013964801.2	gene-CC2D2A	CC2D2A	-2.1386	0.00141537	0.0480977	down
XM_018052313.1	gene-CCAR2	CCAR2	5.01079	0.000102723	0.00489664	up
XM_018043486.1	gene-CCDC15	CCDC15	23.4627	9.06e-15	3.04e-12	up
XM_018056087.1	gene-CCDC187	CCDC187	8.05907	0.000485281	0.0194991	up
XM_018038359.1	gene-CCDC51	CCDC51	-21.4663	1.39e-12	1.22e-10	down
XM_013963267.2	gene-CCDC71L	CCDC71L	0.596236	0.00104414	0.0376533	up
XM_013969421.2	gene-CCDC82	CCDC82	22.2313	2.09e-13	2.72e-11	up
XM_018059875.1	gene-CCDC82	CCDC82	23.3227	1.3e-14	3.91e-12	up
XM_018066131.1	gene-CCDC88C	CCDC88C	-0.624067	0.00136782	0.0470013	down
XM_005683411.3	gene-CCNH	CCNH	5.03162	5.61e-06	0.000318409	up
XM_018050089.1	gene-CCNJL	CCNJL	-0.98038	4.44e-05	0.00228191	down
XM_018062107.1	gene-CCNT2	CCNT2	-0.454084	5.78e-06	0.000327537	down
XM_005697537.3	gene-CCP110	CCP110	5.02075	0.000126921	0.00594615	up
XM_018049307.1	gene-CCSER1	CCSER1	3.23603	0.000716554	0.0273195	up
XM_018042345.1	gene-CCSER2	CCSER2	6.54738	0.000756014	0.0286363	up
XM_018042346.1	gene-CCSER2	CCSER2	-25.4729	3.86e-17	5.91e-14	down
XM_005694862.3	gene-CCT5	CCT5	-0.43622	0.000839681	0.031383	down
XM_018042893.1	gene-CDC42BPG	CDC42BPG	5.44982	2.11e-06	0.000124097	up
XM_018042894.1	gene-CDC42BPG	CDC42BPG	21.5547	1.1e-12	1.02e-10	up
XM_018042895.1	gene-CDC42BPG	CDC42BPG	21.0305	3.86e-12	2.91e-10	up
XM_018042899.1	gene-CDC42BPG	CDC42BPG	9.1033	0.00025388	0.0110817	up
XM_018047335.1	gene-CDCA7L	CDCA7L	-5.09344	3.36e-05	0.00175109	down
XM_018062081.1	gene-CDH11	CDH11	3.21949	4.94e-05	0.00251073	up
XM_018050639.1	gene-CDHR2	CDHR2	-21.7284	7.33e-13	7.4e-11	down
XM_018040389.1	gene-CDIP1	CDIP1	3.01502	0.000201085	0.0090279	up
XM_018052529.1	gene-CDK20	CDK20	-21.2514	2.34e-12	1.86e-10	down
XM_018052693.1	gene-CDK5RAP2	CDK5RAP2	-0.470927	0.000167206	0.00763729	down
XM_005687557.3	gene-CDK8	CDK8	0.683611	0.000573497	0.0224441	up
XM_018051219.1	gene-CDV3	CDV3	-21.7323	7.26e-13	7.38e-11	down
XM_018061754.1	gene-CDYL2	CDYL2	-0.679579	0.00115336	0.0408947	down
XM_018059100.1	gene-CELF1	CELF1	3.60286	0.00106043	0.0381461	up
XM_018056974.1	gene-CELF2	CELF2	-22.8435	4.51e-14	8.69e-12	down
XM_018056987.1	gene-CELF2	CELF2	20.7896	6.82e-12	4.84e-10	up
XM_018048918.1	gene-CELSR1	CELSR1	-0.861495	0.00102009	0.0369667	down
XM_018066296.1	gene-CEMIP	CEMIP	-0.943736	3.93e-05	0.00202954	down
XM_013967827.2	gene-CENPO	CENPO	2.68903	0.00043333	0.0177052	up
XM_018063955.1	gene-CEP112	CEP112	20.6786	8.85e-12	6.14e-10	up
XM_018046358.1	gene-CFAP45	CFAP45	-6.51069	0.00143136	0.0484899	down
XM_018059301.1	gene-CFAP65	CFAP65	-0.559119	0.000536477	0.0211567	down
XM_018064601.1	gene-CHD3	CHD3	10.8068	1.43e-09	9.19e-08	up
XM_018064604.1	gene-CHD3	CHD3	10.9941	5.45e-10	3.52e-08	up
XM_005695720.3	gene-CHL1	CHL1	-3.83131	2.8e-06	0.000163655	down
XM_018051724.1	gene-CHODL	CHODL	-2.98703	7.69e-06	0.000429747	down
XM_018054922.1	gene-CHST10	CHST10	-0.382485	0.00126157	0.0437926	down
XM_018041481.1	gene-CHST15	CHST15	-8.20771	0.00120407	0.0422675	down
XM_018041482.1	gene-CHST15	CHST15	-23.4084	1.05e-14	3.38e-12	down
XM_018039801.1	gene-CHST9	CHST9	-1.16678	0.000522154	0.0207044	down
XM_018059134.1	gene-CKAP5	CKAP5	1.75293	0.000281255	0.0120742	up
XM_018066418.1	gene-CKMT1A	CKMT1A	-21.694	7.97e-13	7.86e-11	down
XM_018067133.1	gene-CLASP2	CLASP2	9.80859	0.000133075	0.00620776	up
XM_018067137.1	gene-CLASP2	CLASP2	22.5351	9.76e-14	1.51e-11	up
XM_018067138.1	gene-CLASP2	CLASP2	24.4406	6.71e-16	4.84e-13	up
XM_018051808.1	gene-CLCN3	CLCN3	-0.46653	0.00012437	0.00584229	down
XM_018057441.1	gene-CLDND1	CLDND1	8.04275	0.000873937	0.0325101	up
XM_018040268.1	gene-CLEC16A	CLEC16A	12.124	2.14e-11	1.41e-09	up
XM_018040274.1	gene-CLEC16A	CLEC16A	-3.44039	2.1e-06	0.000123927	down
XM_018039166.1	gene-CLIC5	CLIC5	1.02906	0.00136802	0.0470013	up
XM_018040653.1	gene-CLN3	CLN3	23.0519	2.62e-14	6.26e-12	up
XM_018053598.1	gene-CLN6	CLN6	-21.4867	1.32e-12	1.18e-10	down
XM_018059054.1	gene-CLP1	CLP1	9.46756	0.000148817	0.00687957	up
XM_018060380.1	gene-CLSTN1	CLSTN1	2.68998	0.000861107	0.0320876	up
XM_018060381.1	gene-CLSTN1	CLSTN1	3.63812	0.000208694	0.00932154	up
XM_018060382.1	gene-CLSTN1	CLSTN1	2.79899	0.00112862	0.0401848	up
XM_018060383.1	gene-CLSTN1	CLSTN1	-0.926087	4.89e-05	0.00249205	down
XM_018054886.1	gene-CNGA3	CNGA3	1.86197	0.00067979	0.0260546	up
XM_018043881.1	gene-CNKSR2	CNKSR2	-22.5732	8.93e-14	1.41e-11	down
XM_005680161.3	gene-CNTN1	CNTN1	6.0645	1.89e-06	0.000111818	up
XM_018057468.1	gene-COL16A1	COL16A1	20.3913	1.65e-11	1.1e-09	up
XM_018057487.1	gene-COL16A1	COL16A1	21.7531	6.78e-13	7.02e-11	up
XM_018057511.1	gene-COL16A1	COL16A1	24.2892	1.01e-15	6.43e-13	up
XM_018057521.1	gene-COL16A1	COL16A1	26.0671	7.08e-18	1.72e-14	up
XM_013975194.2	gene-COL17A1	COL17A1	-0.871866	2.32e-07	1.43e-05	down
XM_018052662.1	gene-COL27A1	COL27A1	-23.4278	9.95e-15	3.27e-12	down
XR_001918483.1	gene-COL27A1	COL27A1	-22.1798	2.41e-13	3.03e-11	down
XM_018041567.1	gene-COL8A2	COL8A2	22.115	2.79e-13	3.42e-11	up
XM_018060705.1	gene-COLGALT2	COLGALT2	0.852357	6.69e-06	0.000376596	up
XM_018066902.1	gene-COPG1	COPG1	-0.684856	0.000129515	0.00604816	down
XM_013974680.2	gene-COPS6	COPS6	-0.433323	4.25e-06	0.000244192	down
XM_018064355.1	gene-CORO6	CORO6	20.9771	4.38e-12	3.26e-10	up
XM_018049737.1	gene-CPEB2	CPEB2	-6.26275	3.11e-07	1.9e-05	down
XM_018049740.1	gene-CPEB2	CPEB2	-9.94715	9.46e-05	0.00453238	down
XM_018041460.1	gene-CPEB3	CPEB3	22.3357	1.6e-13	2.23e-11	up
XM_018041461.1	gene-CPEB3	CPEB3	10.3448	5.1e-07	3.08e-05	up
XM_018041463.1	gene-CPEB3	CPEB3	-10.0918	0.000531859	0.021003	down
XM_005679390.3	gene-CPED1	CPED1	1.77004	6.48e-06	0.000365748	up
XM_005679391.3	gene-CPED1	CPED1	1.5813	0.000170795	0.0077761	up
XM_018046985.1	gene-CPED1	CPED1	20.7343	7.77e-12	5.46e-10	up
XM_018066392.1	gene-CPSF2	CPSF2	9.01038	1.76e-09	1.13e-07	up
XM_018040201.1	gene-CPSF4	CPSF4	5.45953	1.23e-05	0.000680177	up
XM_018046300.1	gene-CRABP2	CRABP2	-0.981835	4.71e-05	0.00240906	down
XM_018060296.1	gene-CREB1	CREB1	11.8941	5.08e-10	3.28e-08	up
XM_005679511.3	gene-CREB3L2	CREB3L2	-0.559544	1.61e-05	0.000878341	down
XM_018047685.1	gene-CSAD	CSAD	-4.61131	2.58e-10	1.67e-08	down
XM_018045111.1	gene-CSF2RA	CSF2RA	20.1401	3.09e-11	2.02e-09	up
XM_018050175.1	gene-CSNK1A1	CSNK1A1	-24.2338	1.17e-15	6.95e-13	down
XM_018066287.1	gene-CTAGE5	CTAGE5	8.50999	0.000106574	0.0050581	up
XM_018041153.1	gene-CTBP2	CTBP2	-4.12483	0.000338023	0.0142655	down
XM_018064620.1	gene-CTC1	CTC1	-7.63589	3.35e-06	0.000194932	down
XM_018042552.1	gene-CTNNA3	CTNNA3	22.2993	1.76e-13	2.39e-11	up
XM_018040278.1	gene-CUX1	CUX1	-1.95205	0.000763133	0.0288558	down
XR_001917574.1	gene-CXHXorf23	CXHXorf23	7.15791	8.23e-05	0.00398991	up
XM_018061936.1	gene-CYLD	CYLD	22.6007	8.27e-14	1.33e-11	up
XM_018065603.1	gene-DAB2	DAB2	8.65191	5.93e-07	3.57e-05	up
XM_013976750.2	gene-DAP3	DAP3	20.9848	4.3e-12	3.21e-10	up
XM_005677854.3	gene-DCLRE1B	DCLRE1B	-0.647509	0.000908521	0.0336103	down
XM_005698704.3	gene-DCTD	DCTD	5.32376	2.99e-05	0.00156657	up
XM_005699742.3	gene-DDB1	DDB1	-0.196848	0.000357337	0.0149719	down
XM_018055745.1	gene-DENND1A	DENND1A	6.89599	1.13e-06	6.74e-05	up
XM_018045906.1	gene-DENND2D	DENND2D	-0.888827	0.000106284	0.00504706	down
XM_018053636.1	gene-DENND4A	DENND4A	3.55932	0.000569514	0.0223082	up
XM_018046148.1	gene-DENND4B	DENND4B	-7.26687	0.00123584	0.0431571	down
XM_018059522.1	gene-DENND5A	DENND5A	-26.2763	3.87e-18	1.25e-14	down
XM_018059523.1	gene-DENND5A	DENND5A	21.6368	8.8e-13	8.5e-11	up
XM_018060924.1	gene-DEPDC5	DEPDC5	-22.8194	4.8e-14	8.98e-12	down
XM_018060925.1	gene-DEPDC5	DEPDC5	-11.0629	3.77e-10	2.44e-08	down
XM_018043565.1	gene-DEUP1	DEUP1	-23.1235	2.2e-14	5.5e-12	down
XM_005680381.3	gene-DGKA	DGKA	1.46843	0.00119537	0.0420637	up
XM_018047364.1	gene-DGKB	DGKB	5.17341	0.000640422	0.0246976	up
XM_013968434.2	gene-DHTKD1	DHTKD1	-0.528146	7.23e-05	0.00353928	down
XM_018062674.1	gene-DHX34	DHX34	3.24449	2.09e-06	0.000123446	up
XM_018053898.1	gene-DIO2	DIO2	-1.51274	1.54e-08	9.73e-07	down
XM_018058187.1	gene-DIS3L2	DIS3L2	-3.48359	0.00143199	0.0484927	down
XM_018058188.1	gene-DIS3L2	DIS3L2	-1.36184	0.00141791	0.0481277	down
XM_018058197.1	gene-DIS3L2	DIS3L2	-6.50671	0.000357739	0.0149744	down
XM_013971505.2	gene-DKKL1	DKKL1	20.3549	1.88e-11	1.25e-09	up
XM_018042828.1	gene-DLG2	DLG2	5.51262	2.98e-05	0.00156315	up
XM_018043863.1	gene-DLG3	DLG3	7.23952	2.2e-06	0.000129331	up
XM_018042256.1	gene-DLG5	DLG5	25.6318	2.46e-17	4.38e-14	up
XM_018042258.1	gene-DLG5	DLG5	22.5219	1.01e-13	1.55e-11	up
XM_018063095.1	gene-DNAAF3	DNAAF3	-23.7343	4.46e-15	1.85e-12	down
XR_001918368.1	gene-DNAJC13	DNAJC13	-4.57925	0.00101646	0.0368686	down
XR_001919032.1	gene-DNAJC5	DNAJC5	23.0252	2.81e-14	6.49e-12	up
XM_018057711.1	gene-DNMT3B	DNMT3B	-0.500056	1.85e-05	0.00099941	down
XM_018044990.1	gene-DOCK7	DOCK7	-24.5768	4.65e-16	3.69e-13	down
XM_018056416.1	gene-DOCK9	DOCK9	3.04393	0.00115273	0.0408947	up
XM_013969550.2	gene-DPAGT1	DPAGT1	-23.3757	1.14e-14	3.57e-12	down
XM_005690613.3	gene-DPT	DPT	1.02296	4.65e-05	0.00238059	up
XM_005684031.3	gene-DPYSL2	DPYSL2	-8.94217	5.88e-06	0.000332388	down
XM_005686933.3	gene-DRC1	DRC1	13.1674	1.35e-05	0.000742303	up
XM_018058150.1	gene-DSCC1	DSCC1	4.68113	2.01e-06	0.000118916	up
XM_013968879.2	gene-DSN1	DSN1	-7.01605	0.000528596	0.0209025	down
XM_018038671.1	gene-DST	DST	-22.3794	1.46e-13	2.09e-11	down
XM_018038677.1	gene-DST	DST	-22.4361	1.27e-13	1.88e-11	down
XM_018038683.1	gene-DST	DST	-22.4997	1.08e-13	1.64e-11	down
XM_018038684.1	gene-DST	DST	-22.3132	1.72e-13	2.36e-11	down
XM_005696999.2	gene-DTNA	DTNA	22.7749	5.33e-14	9.66e-12	up
XM_013974260.2	gene-DTNA	DTNA	25.156	9.39e-17	1.17e-13	up
XM_018059027.1	gene-DTX4	DTX4	-5.07167	0.00017989	0.00815611	down
XM_018055065.1	gene-DYSF	DYSF	-21.218	2.54e-12	1.98e-10	down
XM_018055069.1	gene-DYSF	DYSF	-21.2514	2.34e-12	1.86e-10	down
XM_018055073.1	gene-DYSF	DYSF	-21.218	2.54e-12	1.98e-10	down
XM_018057241.1	gene-DZANK1	DZANK1	2.11844	0.000721541	0.0274857	up
XM_005689267.3	gene-E2F5	E2F5	5.40171	0.000534859	0.0211024	up
XM_018041663.1	gene-EBF3	EBF3	8.89051	0.000784042	0.0295185	up
XM_018039038.1	gene-ECI2	ECI2	-4.09767	2.82e-05	0.001481	down
XM_018043983.1	gene-EDA	EDA	20.588	1.09e-11	7.46e-10	up
XM_018041522.1	gene-EDRF1	EDRF1	0.357256	0.000203092	0.00910866	up
XM_018049989.1	gene-EFNA5	EFNA5	-0.658087	0.000127937	0.00597846	down
XM_018055556.1	gene-EFR3B	EFR3B	-11.4524	0.000154161	0.0071078	down
XM_018065632.1	gene-EGFLAM	EGFLAM	5.56617	6.62e-05	0.00326202	up
XM_018065633.1	gene-EGFLAM	EGFLAM	21.2467	2.3e-12	1.84e-10	up
XM_018040510.1	gene-EIF2AK1	EIF2AK1	-0.712857	0.000222213	0.00983981	down
XM_018046834.1	gene-EIF4A2	EIF4A2	4.1374	0.000395143	0.0163208	up
XM_018061544.1	gene-ELF2	ELF2	2.67331	0.000599106	0.0233	up
XM_018057962.1	gene-ELMO2	ELMO2	-0.338883	0.000456563	0.0184986	down
NM_001287178.1	gene-ELOVL1	ELOVL1	4.12964	0.000266427	0.0115341	up
XM_018054770.1	gene-EMC1	EMC1	-1.26262	0.000908372	0.0336103	down
XM_018066342.1	gene-EML1	EML1	6.38008	0.000556722	0.0218562	up
XM_013967586.2	gene-EML4	EML4	-2.34793	0.000517569	0.0205503	down
XM_018055167.1	gene-EML4	EML4	-8.93899	2.32e-05	0.00123794	down
XM_005690007.3	gene-EMSY	EMSY	6.32528	0.000734991	0.0279249	up
XM_005698620.3	gene-EMX2	EMX2	-0.493895	1.34e-05	0.000736968	down
XM_018039002.1	gene-ENPP4	ENPP4	1.34996	0.000386555	0.016004	up
XM_018061442.1	gene-EP400	EP400	23.7148	3.81e-18	1.25e-14	up
XM_018039684.1	gene-EPB41L3	EPB41L3	23.2554	1.55e-14	4.34e-12	up
XM_018049581.1	gene-EREG	EREG	-7.84681	1.24e-06	7.42e-05	down
XM_005675706.2	gene-ERG	ERG	0.823557	0.0013154	0.04539	up
XM_005688499.3	gene-ERGIC3	ERGIC3	-0.711555	0.000150172	0.00693855	down
XM_018065355.1	gene-ERN1	ERN1	-0.76707	0.000585784	0.0228736	down
XM_018055435.1	gene-ETAA1	ETAA1	3.28872	0.00101443	0.0368257	up
XM_018047722.1	gene-EVA1C	EVA1C	-0.620229	0.000996229	0.0362554	down
XM_018066040.1	gene-EVL	EVL	-5.17025	0.000397501	0.0163949	down
XM_018049473.1	gene-EXOC1	EXOC1	24.9249	1.78e-16	1.7e-13	up
XM_018062124.1	gene-EXOC3L1	EXOC3L1	20.6287	9.95e-12	6.86e-10	up
XM_018054100.1	gene-EXOC5	EXOC5	-23.8737	3.09e-15	1.42e-12	down
XM_018051858.1	gene-EXTL3	EXTL3	-0.648544	4.24e-05	0.00218273	down
XM_018043055.1	gene-FADS1	FADS1	7.08978	0.000380036	0.0157715	up
XM_018041936.1	gene-FAM149A	FAM149A	-0.551531	0.000369097	0.015376	down
XM_018059450.1	gene-FAM160A2	FAM160A2	9.87144	0.000676278	0.0259425	up
XM_013966404.2	gene-FAM184A	FAM184A	-25.4812	3.77e-17	5.91e-14	down
XM_018061481.1	gene-FAM198B	FAM198B	20.7948	6.6e-12	4.71e-10	up
XM_018040539.1	gene-FAM234A	FAM234A	5.42058	0.000448045	0.0182467	up
XM_005684537.3	gene-FAM26E	FAM26E	1.12902	0.000860042	0.0320753	up
XM_018058541.1	gene-FAM91A1	FAM91A1	-23.0263	2.81e-14	6.49e-12	down
XM_018058543.1	gene-FAM91A1	FAM91A1	-22.7428	5.81e-14	1.03e-11	down
XM_018056420.1	gene-FARP1	FARP1	-0.440917	9.77e-09	6.19e-07	down
XM_018041855.1	gene-FAT1	FAT1	22.6159	7.95e-14	1.29e-11	up
XM_018063782.1	gene-FBF1	FBF1	21.9724	3.96e-13	4.51e-11	up
XM_018040015.1	gene-FBXL19	FBXL19	22.8074	4.9e-14	9.05e-12	up
XM_018054114.1	gene-FBXO34	FBXO34	5.55989	5.2e-05	0.0026301	up
XM_018066107.1	gene-FES	FES	-10.7743	1.02e-09	6.6e-08	down
XM_018052496.1	gene-FGD3	FGD3	9.00443	0.000307628	0.0130904	up
XM_018048324.1	gene-FGD4	FGD4	1.58905	2.86e-08	1.79e-06	up
XM_018041771.1	gene-FGFR1	FGFR1	-21.385	1.69e-12	1.43e-10	down
XM_018044662.1	gene-FGFRL1	FGFRL1	20.8886	5.4e-12	3.92e-10	up
XM_005690019.3	gene-FIBIN	FIBIN	1.10561	1.55e-06	9.2e-05	up
XM_018043325.1	gene-FLI1	FLI1	21.6086	9.62e-13	9.14e-11	up
XM_018045126.1	gene-FLNA	FLNA	5.34472	0.000223372	0.00988607	up
XM_018065265.1	gene-FMNL1	FMNL1	-23.4122	1.04e-14	3.36e-12	down
XM_018050723.1	gene-FNIP1	FNIP1	2.02793	0.0002516	0.0110069	up
XM_018048506.1	gene-FOXJ2	FOXJ2	4.25046	0.000510264	0.0203158	up
XM_018065397.1	gene-FOXK2	FOXK2	-0.26461	0.00103189	0.0372579	down
XM_005695731.3	gene-FOXP1	FOXP1	4.89906	0.000154978	0.00713793	up
XM_018039052.1	gene-FOXP4	FOXP4	-1.59115	0.000252945	0.0110492	down
XM_005685646.3	gene-FRMD6	FRMD6	-22.7256	5.99e-14	1.05e-11	down
XM_018050393.1	gene-FSTL4	FSTL4	-2.24345	8.77e-05	0.00422919	down
XM_018066319.1	gene-FURIN	FURIN	-4.02765	5.51e-05	0.00275834	down
XM_018060782.1	gene-G0S2	G0S2	21.3372	1.86e-12	1.54e-10	up
XM_013967229.2	gene-GALNT15	GALNT15	1.63141	7.24e-06	0.000405638	up
XM_018051834.1	gene-GATA4	GATA4	7.02932	0.000134367	0.00626471	up
XM_018045975.1	gene-GDAP2	GDAP2	-7.81647	5.74e-06	0.000325377	down
XM_013969769.2	gene-GDPD5	GDPD5	21.4574	1.39e-12	1.22e-10	up
XM_018058230.1	gene-GEM	GEM	1.78567	0.000254178	0.0110817	up
XM_005692154.3	gene-GFOD2	GFOD2	-5.39994	0.000254586	0.0110875	down
XM_013975677.2	gene-GHITM	GHITM	-26.9225	5.77e-19	3.15e-15	down
XM_018042145.1	gene-GHITM	GHITM	-25.3788	5.04e-17	7.32e-14	down
XM_018050802.1	gene-GNA15	GNA15	-22.2267	2.14e-13	2.77e-11	down
XM_018039550.1	gene-GNAL	GNAL	-3.23834	0.00139232	0.0475099	down
XM_018060493.1	gene-GNB1	GNB1	7.67678	1.23e-07	7.61e-06	up
XM_005675355.3	gene-GOLIM4	GOLIM4	2.60277	0.000577748	0.0225902	up
XM_018053930.1	gene-GPATCH2L	GPATCH2L	2.40946	6.61e-05	0.00325777	up
XM_018053932.1	gene-GPATCH2L	GPATCH2L	1.70934	6.26e-05	0.00310188	up
XM_018063247.1	gene-GPD2	GPD2	-21.5794	1.06e-12	9.85e-11	down
XM_018054056.1	gene-GPHN	GPHN	22.1891	2.31e-13	2.95e-11	up
XM_018046463.1	gene-GPR161	GPR161	-23.2466	1.6e-14	4.36e-12	down
XM_005681433.3	gene-GPRIN3	GPRIN3	-0.742017	0.000435881	0.0177845	down
XM_018065418.1	gene-GPS1	GPS1	-1.78624	2.21e-06	0.000129674	down
XM_018061975.1	gene-GPT2	GPT2	-1.02909	0.000271891	0.011759	down
XM_013965356.2	gene-GRAMD3	GRAMD3	21.6037	9.75e-13	9.23e-11	up
XM_018040473.1	gene-GSPT1	GSPT1	-0.634548	0.000538995	0.0212463	down
XM_018062503.1	gene-GTDC1	GTDC1	2.55041	0.000494692	0.0198316	up
XM_018048914.1	gene-GTSE1	GTSE1	-22.9199	3.71e-14	7.69e-12	down
XM_018047915.1	gene-GXYLT1	GXYLT1	5.36311	2.11e-09	1.35e-07	up
XM_018047917.1	gene-GXYLT1	GXYLT1	0.555247	0.0013738	0.0471004	up
XM_018054328.1	gene-HERC1	HERC1	23.4034	1.06e-14	3.38e-12	up
XM_018042166.1	gene-HEYL	HEYL	6.53936	0.000516689	0.0205247	up
XM_018063590.1	gene-HGS	HGS	20.6008	1.06e-11	7.26e-10	up
XM_018046873.1	gene-HIPK2	HIPK2	10.5829	4.06e-41	1.18e-36	up
XM_018046874.1	gene-HIPK2	HIPK2	24.4792	6.04e-16	4.54e-13	up
XM_018059266.1	gene-HIPK3	HIPK3	5.94413	3.78e-07	2.3e-05	up
XM_018042597.1	gene-HKDC1	HKDC1	-1.56254	0.000352973	0.0148104	down
XM_018049640.1	gene-HNRNPD	HNRNPD	-0.792272	0.00138112	0.047242	down
XM_018051773.1	gene-HNRNPK	HNRNPK	6.00112	3.53e-06	0.000204837	up
XM_005675932.3	gene-HOXD10	HOXD10	2.7691	5.46e-05	0.00274045	up
XM_018059685.1	gene-HYOU1	HYOU1	-0.569287	2.9e-07	1.77e-05	down
XM_018059688.1	gene-HYOU1	HYOU1	-4.482	0.000397329	0.0163949	down
XM_018039102.1	gene-ICK	ICK	21.363	1.74e-12	1.46e-10	up
XR_001917123.1	gene-ICK	ICK	21.495	1.27e-12	1.14e-10	up
XR_001917124.1	gene-ICK	ICK	24.1135	1.62e-15	8.83e-13	up
XM_018066021.1	gene-IDH2	IDH2	-0.472435	0.000590397	0.0230228	down
XM_018048591.1	gene-IFFO1	IFFO1	-7.69542	0.000473478	0.0190864	down
XM_018048286.1	gene-IFT80	IFT80	1.95888	0.00019167	0.00862299	up
XM_018053649.1	gene-IGDCC4	IGDCC4	8.90461	4.58e-06	0.000262105	up
XM_005680539.3	gene-IGF1	IGF1	-25.0721	1.19e-16	1.4e-13	down
XM_018046972.1	gene-IGF2BP2	IGF2BP2	-23.2527	1.57e-14	4.36e-12	down
XM_018046975.1	gene-IGF2BP2	IGF2BP2	19.9473	4.48e-11	2.91e-09	up
XM_018054247.1	gene-IGFBP5	IGFBP5	-4.39506	5.55e-05	0.00277105	down
XM_018048958.1	gene-IGSF10	IGSF10	-2.98728	4.95e-06	0.000283052	down
XM_018045968.1	gene-IGSF3	IGSF3	-3.67786	8.05e-05	0.00391352	down
XM_018054961.1	gene-IL1RL2	IL1RL2	5.22788	0.000596861	0.0232334	up
XM_018054889.1	gene-INPP4A	INPP4A	-22.7233	6.13e-14	1.07e-11	down
XM_018056108.1	gene-INPP5E	INPP5E	-21.9834	3.91e-13	4.47e-11	down
XM_018045151.1	gene-INTS1	INTS1	1.8319	0.000469376	0.0189473	up
XM_005677486.3	gene-INTS3	INTS3	-0.615283	1.42e-05	0.000777803	down
XM_005683544.2	gene-INTS9	INTS9	-0.429828	0.000525001	0.0207887	down
XM_013966062.2	gene-INVS	INVS	-7.2337	3.95e-06	0.000227746	down
XM_018066662.1	gene-IP6K1	IP6K1	-23.0452	2.69e-14	6.34e-12	down
XM_018067213.1	gene-IQSEC1	IQSEC1	23.0461	2.66e-14	6.32e-12	up
XM_018039301.1	gene-IRF4	IRF4	-21.3128	2.02e-12	1.65e-10	down
XM_018058864.1	gene-IRS1	IRS1	-0.680935	0.000281935	0.0120915	down
XM_018044312.1	gene-IRS4	IRS4	1.90323	0.000212934	0.00948664	up
XM_018047684.1	gene-ITGB7	ITGB7	3.4781	0.00037777	0.0156849	up
XM_018038897.1	gene-ITPR3	ITPR3	-1.16652	2.74e-06	0.000160477	down
XM_005698447.3	gene-ITPRIP	ITPRIP	3.83663	0.000127287	0.00596007	up
XM_018061526.1	gene-JADE1	JADE1	-25.4765	3.83e-17	5.91e-14	down
XM_013972225.2	gene-JUP	JUP	-1.17152	2.13e-06	0.00012544	down
XM_018065097.1	gene-JUP	JUP	-1.5453	0.000449979	0.0182998	down
XM_018054857.1	gene-KANSL3	KANSL3	-23.0359	2.76e-14	6.45e-12	down
XM_018065108.1	gene-KAT2A	KAT2A	-0.716831	0.000146567	0.00678636	down
XM_005680784.3	gene-KCNJ8	KCNJ8	1.16082	0.000231196	0.0102013	up
XM_018042422.1	gene-KCNMA1	KCNMA1	4.62264	0.000206334	0.00924453	up
XM_018058576.1	gene-KCNQ3	KCNQ3	1.6415	0.000284042	0.0121699	up
XM_018039651.1	gene-KCTD1	KCTD1	7.09869	0.00085461	0.0318863	up
XM_005696275.3	gene-KCTD20	KCTD20	2.40296	0.00108924	0.0389737	up
XM_018056603.1	gene-KDF1	KDF1	20.9883	4.27e-12	3.19e-10	up
XM_013976537.2	gene-KDM5C	KDM5C	3.15861	2.27e-05	0.00121137	up
XM_013976540.2	gene-KDM5C	KDM5C	-23.8501	3.28e-15	1.48e-12	down
XM_005681629.3	gene-KDR	KDR	0.654265	0.00128844	0.0445655	up
XM_018050930.1	gene-KHSRP	KHSRP	-4.99309	0.000501223	0.0200565	down
XM_018049765.1	gene-KIAA0232	KIAA0232	20.7343	7.77e-12	5.46e-10	up
XM_018062290.1	gene-KIAA0355	KIAA0355	22.751	5.66e-14	1.01e-11	up
XM_018062292.1	gene-KIAA0355	KIAA0355	22.8956	3.92e-14	8e-12	up
XM_018061804.1	gene-KIAA0513	KIAA0513	5.77745	0.000524897	0.0207887	up
XM_005677961.3	gene-KIAA1324	KIAA1324	-1.22294	0.00099902	0.0363418	down
XR_001918998.1	gene-KIAA1462	KIAA1462	9.60035	0.000305107	0.0130022	up
XM_018039531.1	gene-KIAA1468	KIAA1468	3.8129	0.000464803	0.0187801	up
XM_018057898.1	gene-KIAA1522	KIAA1522	-0.877913	0.000448721	0.0182571	down
XM_018048885.1	gene-KIAA1644	KIAA1644	1.05927	3.96e-05	0.00204169	up
XM_018038722.1	gene-KIF13A	KIF13A	-26.0995	6.45e-18	1.61e-14	down
XM_018056934.1	gene-KIF16B	KIF16B	-21.422	1.55e-12	1.33e-10	down
XM_018056936.1	gene-KIF16B	KIF16B	21.5041	1.24e-12	1.13e-10	up
XM_018041592.1	gene-KIF20B	KIF20B	-4.78612	0.000274398	0.0118498	down
XM_018047924.1	gene-KIF21A	KIF21A	22.703	6.39e-14	1.1e-11	up
XM_018047930.1	gene-KIF21A	KIF21A	2.74503	0.000145597	0.0067558	up
XM_018047934.1	gene-KIF21A	KIF21A	21.278	2.14e-12	1.73e-10	up
XM_013966141.2	gene-KIF24	KIF24	-0.64289	0.00112846	0.0401848	down
XM_013965328.2	gene-KIF3A	KIF3A	-25.7345	1.84e-17	3.73e-14	down
XM_018050735.1	gene-KIF3A	KIF3A	-26.2771	3.86e-18	1.25e-14	down
XM_018050739.1	gene-KIF3A	KIF3A	-6.43005	8.77e-05	0.00423086	down
XM_018058750.1	gene-KIFC2	KIFC2	-22.8008	5.03e-14	9.24e-12	down
XM_018046928.1	gene-KLHDC10	KLHDC10	-4.35067	4.81e-05	0.00245455	down
XM_018039251.1	gene-KLHL31	KLHL31	2.08599	4.03e-06	0.000231894	up
XM_018047324.1	gene-KLHL7	KLHL7	-22.5011	1.08e-13	1.64e-11	down
XM_018061362.1	gene-KMT5A	KMT5A	2.52463	0.000254233	0.0110817	up
XM_018048388.1	gene-KRAS	KRAS	5.1449	2.04e-05	0.00109566	up
XM_018061042.1	gene-KREMEN1	KREMEN1	-1.1075	2.54e-05	0.00134939	down
XM_005680100.3	gene-KRT7	KRT7	-1.01667	0.000628121	0.0242769	down
XM_018054105.1	gene-KTN1	KTN1	5.01271	5.12e-06	0.000292327	up
XM_018054108.1	gene-KTN1	KTN1	3.35015	0.000224702	0.0099298	up
XM_018054109.1	gene-KTN1	KTN1	5.22072	2.25e-06	0.000132249	up
XM_005684732.3	gene-LAMA2	LAMA2	27.9408	2.63e-20	2.56e-16	up
XM_018039637.1	gene-LAMA3	LAMA3	-0.703732	0.00119055	0.0419447	down
XM_013970345.2	gene-LAMC2	LAMC2	-0.468715	0.000518876	0.0205929	down
XM_018050127.1	gene-LARP1	LARP1	-0.544451	0.00123978	0.0432601	down
XM_018053565.1	gene-LARP6	LARP6	0.661241	0.000188378	0.00849237	up
XM_018064990.1	gene-LASP1	LASP1	-0.650264	0.00125683	0.0436974	down
XM_005681919.3	gene-LDB2	LDB2	1.20846	0.000639812	0.024685	up
XM_018053682.1	gene-LHFPL2	LHFPL2	3.80409	0.000493307	0.0197942	up
XM_018055723.1	gene-LHX6	LHX6	-21.3595	1.8e-12	1.51e-10	down
XM_018064230.1	gene-LIG3	LIG3	-0.371477	0.000122142	0.00574692	down
XM_018055308.1	gene-LIMS1	LIMS1	-0.78639	0.00028037	0.012054	down
XM_018060226.1	gene-LIN9	LIN9	21.7871	6.24e-13	6.62e-11	up
XM_005697191.3	gene-LIPG	LIPG	0.954228	0.00071056	0.0271147	up
XM_018066365.1	gene-LMAN1L	LMAN1L	-2.79293	0.000154387	0.00711445	down
NM_001285623.1	gene-LOC100861279	LOC100861279	1.58728	0.000248016	0.0108665	up
XM_018048843.1	gene-LOC102169002	LOC102169002	-4.44908	0.000422566	0.017306	down
XM_018042139.1	gene-LOC102169353	LOC102169353	-11.9324	8.05e-05	0.00391352	down
XM_018042144.1	gene-LOC102169353	LOC102169353	-26.8509	7.14e-19	3.67e-15	down
XM_013975506.2	gene-LOC102169935	LOC102169935	22.0263	3.46e-13	4.09e-11	up
XM_018044151.1	gene-LOC102170676	LOC102170676	23.7718	4.02e-15	1.74e-12	up
XM_018048270.1	gene-LOC102171143	LOC102171143	1.93626	8.94e-05	0.00430796	up
XM_018059558.1	gene-LOC102172084	LOC102172084	-23.7358	4.45e-15	1.85e-12	down
XM_018059559.1	gene-LOC102172084	LOC102172084	-22.7407	5.79e-14	1.03e-11	down
NM_001287574.1	gene-LOC102173131	LOC102173131	-6.43989	1.16e-09	7.44e-08	down
XM_018045808.1	gene-LOC102173333	LOC102173333	3.65472	2.61e-05	0.00138147	up
XM_005694796.3	gene-LOC102173506	LOC102173506	1.31782	0.00076382	0.0288693	up
XR_001917202.1	gene-LOC102173992	LOC102173992	-23.5903	6.52e-15	2.39e-12	down
XM_018059406.1	gene-LOC102174380	LOC102174380	-0.993844	5.45e-06	0.000309922	down
XM_018049117.1	gene-LOC102175008	LOC102175008	1.27812	0.000921446	0.0339659	up
XM_005680884.3	gene-LOC102175560	LOC102175560	0.83746	0.000160089	0.00734617	up
XM_005693218.3	gene-LOC102175889	LOC102175889	0.771283	0.00037029	0.0154138	up
XM_018057135.1	gene-LOC102176896	LOC102176896	23.9378	2.59e-15	1.24e-12	up
XM_005689457.2	gene-LOC102177258	LOC102177258	-22.8972	3.93e-14	8.01e-12	down
XR_001919990.1	gene-LOC102177570	LOC102177570	-23.6009	6.34e-15	2.35e-12	down
XM_018040761.1	gene-LOC102177581	LOC102177581	22.609	8.1e-14	1.31e-11	up
XM_018040522.1	gene-LOC102177858	LOC102177858	22.4168	1.31e-13	1.93e-11	up
XM_005697968.3	gene-LOC102178324	LOC102178324	-0.411957	0.00137233	0.0470938	down
XM_018050352.1	gene-LOC102178535	LOC102178535	-4.96789	0.000840401	0.0313831	down
XM_018053092.1	gene-LOC102179006	LOC102179006	6.42215	9.89e-05	0.0047195	up
XM_018059331.1	gene-LOC102179090	LOC102179090	8.6628	2.11e-05	0.00113088	up
XM_013974103.2	gene-LOC102180173	LOC102180173	-2.69091	1.07e-12	9.92e-11	down
XM_018038534.1	gene-LOC102180173	LOC102180173	-1.9787	8.1e-05	0.00393599	down
XM_018043119.1	gene-LOC102180829	LOC102180829	1.84889	1.38e-05	0.000757269	up
XM_018038980.1	gene-LOC102180906	LOC102180906	-21.9319	4.41e-13	4.94e-11	down
XM_013969574.2	gene-LOC102181614	LOC102181614	-6.03956	7.05e-06	0.000395498	down
XM_005697319.2	gene-LOC102181826	LOC102181826	2.8255	0.000138864	0.00646747	up
XM_018051875.1	gene-LOC102182127	LOC102182127	-1.0771	0.000222214	0.00983981	down
XM_018046336.1	gene-LOC102182460	LOC102182460	0.893907	0.00107288	0.0385145	up
XM_018044257.1	gene-LOC102182655	LOC102182655	-22.8599	4.33e-14	8.39e-12	down
XM_018045460.1	gene-LOC102183132	LOC102183132	1.85287	2.33e-05	0.00124371	up
XM_013963556.2	gene-LOC102184403	LOC102184403	-4.06662	0.000505336	0.0201564	down
XM_005682296.3	gene-LOC102184710	LOC102184710	-1.77706	0.000247856	0.0108649	down
XM_018045876.1	gene-LOC102185621	LOC102185621	1.30115	0.000295953	0.0126491	up
XM_005675654.3	gene-LOC102186806	LOC102186806	-0.716607	6.33e-09	4.03e-07	down
XM_018062002.1	gene-LOC102188073	LOC102188073	21.7652	6.58e-13	6.91e-11	up
XM_018046005.1	gene-LOC102188370	LOC102188370	24.3552	8.46e-16	5.76e-13	up
XM_018042576.1	gene-LOC102188472	LOC102188472	1.88123	0.000282748	0.0121204	up
XM_013965331.2	gene-LOC102189116	LOC102189116	4.22857	0.000111266	0.00525791	up
XM_018064274.1	gene-LOC102189340	LOC102189340	20.1022	3.38e-11	2.2e-09	up
XM_018060224.1	gene-LOC102189503	LOC102189503	-0.344358	0.000919953	0.0339324	down
XM_018047769.1	gene-LOC102190297	LOC102190297	22.1472	2.57e-13	3.2e-11	up
XM_005677944.3	gene-LOC102190481	LOC102190481	1.62775	0.000216004	0.00959403	up
XM_005692255.2	gene-LOC102190903	LOC102190903	6.2162	0.00104728	0.0377508	up
XM_018058457.1	gene-LOC102191152	LOC102191152	1.02808	0.000762063	0.028828	up
XM_013965702.2	gene-LOC102191423	LOC102191423	-8.33194	0.000163947	0.00750345	down
XM_013971147.2	gene-LOC106501765	LOC106501765	1.502	0.00023261	0.0102561	up
XM_013967752.2	gene-LOC106502633	LOC106502633	-0.682755	2.59e-08	1.63e-06	down
XR_001918728.1	gene-LOC106503629	LOC106503629	-7.29792	3.52e-05	0.00182977	down
XM_013965752.2	gene-LOC108633191	LOC108633191	4.23939	0.00138674	0.0473645	up
XM_018050072.1	gene-LOC108633191	LOC108633191	12.3832	1.06e-34	2.31e-30	up
XM_018048960.1	gene-LOC108633277	LOC108633277	-0.699761	0.000172736	0.00785216	down
XM_018044094.1	gene-LOC108634436	LOC108634436	1.97621	3.7e-05	0.00192146	up
XM_018045512.1	gene-LOC108635304	LOC108635304	1.7393	0.00143908	0.0486571	up
XM_018061955.1	gene-LOC108637962	LOC108637962	-0.853533	0.000887745	0.0329675	down
XM_018065914.1	gene-LOC108638473	LOC108638473	-1.86102	0.000369086	0.015376	down
XM_018051505.1	gene-LPAR2	LPAR2	20.9771	4.38e-12	3.26e-10	up
XM_005697070.2	gene-LPIN2	LPIN2	22.5977	8.34e-14	1.34e-11	up
NM_001285607.1	gene-LPL	LPL	4.8392	2.67e-05	0.00140875	up
XM_018056756.1	gene-LRCH1	LRCH1	-6.14823	3.6e-05	0.00187131	down
XM_018044321.1	gene-LRP8	LRP8	-22.2979	1.79e-13	2.42e-11	down
XM_018045438.1	gene-LRRC40	LRRC40	-21.3648	1.78e-12	1.49e-10	down
XM_005693668.3	gene-LRRC59	LRRC59	-0.409773	0.00010368	0.00493686	down
XM_018039140.1	gene-LRRC73	LRRC73	20.8609	5.77e-12	4.15e-10	up
XM_018040595.1	gene-LRRFIP1	LRRFIP1	-6.96817	0.00015159	0.00700032	down
XM_018038414.1	gene-LRRN1	LRRN1	1.33817	0.000345984	0.0145592	up
XM_018043213.1	gene-LTBP3	LTBP3	22.8614	4.26e-14	8.3e-12	up
XM_018054820.1	gene-MAL	MAL	1.20899	1.34e-05	0.000736666	up
XM_018062736.1	gene-MAMSTR	MAMSTR	-22.1273	2.74e-13	3.37e-11	down
XM_018066104.1	gene-MAN2A2	MAN2A2	20.9421	4.76e-12	3.5e-10	up
XM_005676452.3	gene-MAP2	MAP2	-11.148	0.000229948	0.0101514	down
XM_013964618.2	gene-MAP3K7CL	MAP3K7CL	1.21094	5.81e-05	0.00289253	up
XM_018042890.1	gene-MAP4K2	MAP4K2	20.4279	1.59e-11	1.06e-09	up
XM_018054930.1	gene-MAP4K4	MAP4K4	21.1525	2.89e-12	2.21e-10	up
XM_018054934.1	gene-MAP4K4	MAP4K4	21.3014	2.02e-12	1.65e-10	up
XM_018054939.1	gene-MAP4K4	MAP4K4	21.343	1.83e-12	1.53e-10	up
XM_018054941.1	gene-MAP4K4	MAP4K4	21.4575	1.39e-12	1.22e-10	up
XM_018054946.1	gene-MAP4K4	MAP4K4	21.3208	1.93e-12	1.59e-10	up
XM_018054949.1	gene-MAP4K4	MAP4K4	20.9145	5.08e-12	3.72e-10	up
XM_018043822.1	gene-MAP7D2	MAP7D2	21.0941	3.32e-12	2.52e-10	up
XM_013964774.2	gene-MAPK10	MAPK10	8.78096	5.67e-06	0.000321901	up
XM_018064746.1	gene-MAPK7	MAPK7	5.84579	0.000265806	0.0115129	up
XM_018040045.1	gene-MAPK8IP3	MAPK8IP3	-7.5843	1.29e-05	0.000709077	down
XM_018065282.1	gene-MAPT	MAPT	22.8124	4.84e-14	9.02e-12	up
XM_018065294.1	gene-MAPT	MAPT	-21.8217	5.84e-13	6.28e-11	down
XM_018066072.1	gene-MARK3	MARK3	25.4445	4.18e-17	6.29e-14	up
XM_018043687.1	gene-MAST2	MAST2	21.7965	6.1e-13	6.53e-11	up
XM_018051423.1	gene-MAST3	MAST3	-1.02351	0.000676569	0.0259425	down
XM_018058266.1	gene-MATN2	MATN2	1.25185	0.000219971	0.00975038	up
XM_005675429.3	gene-MBNL1	MBNL1	1.32757	5.24e-05	0.00264461	up
XM_018064831.1	gene-MBTD1	MBTD1	-21.9568	4.15e-13	4.69e-11	down
XM_018064834.1	gene-MBTD1	MBTD1	-24.6916	3.4e-16	2.82e-13	down
XM_018064838.1	gene-MBTD1	MBTD1	1.77744	1.78e-05	0.000960893	up
XM_018045687.1	gene-MCOLN3	MCOLN3	3.53637	0.00018529	0.00837764	up
XM_005696321.3	gene-MEA1	MEA1	22.5387	9.68e-14	1.5e-11	up
XM_005675350.2	gene-MECOM	MECOM	5.63972	1.68e-06	0.000100006	up
XM_013973781.2	gene-MECR	MECR	-22.3823	1.45e-13	2.08e-11	down
XM_005684754.3	gene-MED23	MED23	1.38648	0.000919481	0.0339294	up
XM_018039422.1	gene-MEF2D	MEF2D	-22.5389	9.78e-14	1.51e-11	down
XM_013963311.2	gene-MET	MET	4.02796	0.000224286	0.00991645	up
XM_018041185.1	gene-METTL10	METTL10	-21.2364	2.42e-12	1.92e-10	down
XM_018040827.1	gene-METTL22	METTL22	-3.26868	0.000701673	0.0267991	down
XM_018060327.1	gene-MFN2	MFN2	-4.99679	0.000180595	0.0081753	down
XM_018041606.1	gene-MFSD13A	MFSD13A	-23.6783	5.14e-15	2.06e-12	down
XM_018060053.1	gene-MFSD4A	MFSD4A	0.933263	0.00065505	0.0251949	up
XM_018067052.1	gene-MGLL	MGLL	7.50566	0.000654581	0.0251879	up
XM_018064468.1	gene-MINK1	MINK1	22.9268	3.62e-14	7.58e-12	up
XM_018064470.1	gene-MINK1	MINK1	22.638	7.53e-14	1.25e-11	up
XM_018064477.1	gene-MINK1	MINK1	23.3931	1.09e-14	3.46e-12	up
XM_018066477.1	gene-MIPOL1	MIPOL1	-23.1877	1.86e-14	4.79e-12	down
XM_018067160.1	gene-MITF	MITF	22.3137	1.7e-13	2.34e-11	up
XM_005691571.3	gene-MLEC	MLEC	-0.60482	7.81e-06	0.000435856	down
XM_018053960.1	gene-MLH3	MLH3	4.06056	6.63e-06	0.000373816	up
XM_018060964.1	gene-MORC2	MORC2	-23.1206	2.22e-14	5.52e-12	down
XM_018051962.1	gene-MPDZ	MPDZ	-21.7237	7.42e-13	7.46e-11	down
XM_018047068.1	gene-MPP6	MPP6	20.8589	5.79e-12	4.17e-10	up
XM_018047071.1	gene-MPP6	MPP6	11.0666	1.39e-05	0.000757956	up
XM_018055725.1	gene-MRRF	MRRF	-7.155	0.000161897	0.00741742	down
XM_018058423.1	gene-MSC	MSC	-0.988172	0.000736285	0.0279618	down
XM_018038636.1	gene-MSH5	MSH5	-22.938	3.54e-14	7.5e-12	down
XM_005680216.3	gene-MSRB3	MSRB3	3.78977	0.00101155	0.0367517	up
XM_018039583.1	gene-MTCL1	MTCL1	-7.71649	0.000863576	0.0321658	down
XM_018058260.1	gene-MTDH	MTDH	1.8967	0.00139263	0.0475099	up
XM_018060994.1	gene-MTMR3	MTMR3	21.221	2.45e-12	1.93e-10	up
XM_018060998.1	gene-MTMR3	MTMR3	20.9848	4.3e-12	3.21e-10	up
XM_018042443.1	gene-MTR	MTR	-1.95534	0.000167712	0.00765246	down
XM_018065663.1	gene-MTRR	MTRR	-3.86281	0.000776039	0.029293	down
XM_005681379.2	gene-MTTP	MTTP	3.85985	0.00146119	0.0492709	up
XM_018041909.1	gene-MTUS1	MTUS1	4.13773	0.00107075	0.0384698	up
XM_018046233.1	gene-MUC1	MUC1	-1.11434	0.000603005	0.023409	down
XM_013962852.2	gene-MUC4	MUC4	-0.99543	1.17e-06	6.99e-05	down
XM_018048167.1	gene-MYBPC1	MYBPC1	20.5937	1.08e-11	7.37e-10	up
XM_018062840.1	gene-MYH14	MYH14	3.04729	0.000933898	0.0342729	up
XM_018064336.1	gene-MYO18A	MYO18A	-21.6899	8.06e-13	7.93e-11	down
XM_018064241.1	gene-MYO1D	MYO1D	-0.541836	0.000140788	0.00654307	down
XM_018054216.1	gene-MYO5A	MYO5A	-8.75746	0.000507134	0.020215	down
XM_018053556.1	gene-MYO9A	MYO9A	23.3753	1.14e-14	3.57e-12	up
XM_018053561.1	gene-MYO9A	MYO9A	23.4047	1.05e-14	3.38e-12	up
XM_005690643.3	gene-MYOC	MYOC	1.20331	0.000950301	0.0348352	up
XM_018056801.1	gene-NAA16	NAA16	23.181	1.88e-14	4.83e-12	up
XM_018043313.1	gene-NAA40	NAA40	20.3049	2e-11	1.32e-09	up
XR_309793.3	gene-NABP1	NABP1	-8.38675	0.0006947	0.0265443	down
XM_018042951.1	gene-NAP1L4	NAP1L4	-10.7214	0.000396117	0.0163533	down
XM_005679745.3	gene-NAV3	NAV3	-22.1823	2.39e-13	3.02e-11	down
XM_013963652.2	gene-NAV3	NAV3	-5.04738	0.000179341	0.00813542	down
XM_013963655.2	gene-NAV3	NAV3	24.3142	9.45e-16	6.11e-13	up
XM_018055622.1	gene-NBAS	NBAS	6.6228	3.82e-06	0.000220853	up
XM_018059008.1	gene-NCAPD3	NCAPD3	-9.41368	9.87e-08	6.12e-06	down
XM_018064711.1	gene-NCOR1	NCOR1	6.82235	1.49e-07	9.16e-06	up
XM_018061391.1	gene-NCOR2	NCOR2	-9.19499	7.06e-05	0.0034651	down
XM_018061396.1	gene-NCOR2	NCOR2	-24.3665	8.23e-16	5.65e-13	down
XM_005677220.3	gene-NCSTN	NCSTN	-0.698723	6.11e-06	0.000345251	down
XM_018042250.1	gene-NDST2	NDST2	-8.06109	0.00101577	0.0368589	down
XM_018042251.1	gene-NDST2	NDST2	-8.99218	2.75e-07	1.68e-05	down
XM_018062880.1	gene-NEB	NEB	-24.4623	6.35e-16	4.61e-13	down
XM_005677181.3	gene-NECTIN4	NECTIN4	22.3578	1.5e-13	2.13e-11	up
XR_001918678.1	gene-NEDD4	NEDD4	-22.4059	1.37e-13	1.98e-11	down
XM_018039015.1	gene-NEDD9	NEDD9	-0.671915	8.1e-05	0.00393459	down
XM_018054667.1	gene-NEO1	NEO1	-6.82547	3.67e-05	0.00190247	down
XM_018054669.1	gene-NEO1	NEO1	-24.7009	3.31e-16	2.8e-13	down
XM_018061972.1	gene-NETO2	NETO2	-21.7296	7.32e-13	7.4e-11	down
XM_018041613.1	gene-NEURL1	NEURL1	-6.87604	0.000819749	0.0306906	down
XM_018051245.1	gene-NFIX	NFIX	-1.65436	0.000929771	0.034185	down
XM_005678630.3	gene-NFYC	NFYC	9.3532	0.000185398	0.00837764	up
XM_018062026.1	gene-NLRC5	NLRC5	-0.998929	0.000407554	0.0167541	down
XM_013972605.2	gene-NLRP1	NLRP1	1.51484	0.000189824	0.00854874	up
XM_005676013.3	gene-NOSTRIN	NOSTRIN	1.02925	0.000211749	0.0094435	up
XM_018065682.1	gene-NPR3	NPR3	1.46573	0.00123877	0.0432418	up
XM_018047207.1	gene-NRCAM	NRCAM	21.3014	2.02e-12	1.65e-10	up
XM_018059611.1	gene-NUCB2	NUCB2	10.6948	5.1e-08	3.18e-06	up
XM_018059414.1	gene-NUMA1	NUMA1	3.20137	0.000551129	0.0216561	up
XM_018059417.1	gene-NUMA1	NUMA1	3.59134	0.000208416	0.00931389	up
XM_005697656.3	gene-NUPR1	NUPR1	1.0448	0.000819056	0.0306779	up
XM_018041596.1	gene-OBFC1	OBFC1	7.49107	0.000456465	0.0184986	up
XM_018058939.1	gene-OBSL1	OBSL1	9.08412	0.000337793	0.0142627	up
XM_005679323.3	gene-OGDH	OGDH	-7.55505	7.24e-06	0.000405697	down
XM_018062009.1	gene-OGFOD1	OGFOD1	19.9473	4.48e-11	2.91e-09	up
XM_013968579.2	gene-OSBPL6	OSBPL6	-4.60254	0.00118098	0.0416748	down
NM_001285584.1	gene-OVN	OVN	-5.13015	6.74e-09	4.28e-07	down
XM_013965768.2	gene-P2RY14	P2RY14	-5.24731	0.000955029	0.0349455	down
XM_018042154.1	gene-PABPC4	PABPC4	-1.40314	2.19e-06	0.000128442	down
XR_001917385.1	gene-PABPC4	PABPC4	23.6271	5.87e-15	2.24e-12	up
XM_018051787.1	gene-PALLD	PALLD	-26.8277	7.65e-19	3.71e-15	down
XM_018056594.1	gene-PAN3	PAN3	5.34864	5.41e-06	0.000308205	up
XM_018056596.1	gene-PAN3	PAN3	8.67033	4.88e-09	3.12e-07	up
XM_018056597.1	gene-PAN3	PAN3	6.79357	4.86e-07	2.94e-05	up
XM_018061949.1	gene-PAPD5	PAPD5	-21.2364	2.42e-12	1.92e-10	down
XM_018053998.1	gene-PAPLN	PAPLN	-24.9233	1.79e-16	1.7e-13	down
XM_018054746.1	gene-PAX7	PAX7	-21.6712	8.44e-13	8.2e-11	down
XM_018055345.1	gene-PAX8	PAX8	-1.3764	2.66e-05	0.00140875	down
XM_018051502.1	gene-PBX4	PBX4	-0.854138	5.75e-05	0.00286619	down
XM_018047674.1	gene-PCBP2	PCBP2	-0.78679	3.86e-06	0.000222444	down
XM_005688214.3	gene-PCED1A	PCED1A	5.81358	5.14e-05	0.00260256	up
XM_018057947.1	gene-PCIF1	PCIF1	2.82844	0.00051426	0.0204469	up
XM_018057948.1	gene-PCIF1	PCIF1	6.24155	0.00105587	0.0379976	up
XM_005675916.3	gene-PDE11A	PDE11A	1.30823	0.00035955	0.015043	up
XM_005694675.3	gene-PDE4D	PDE4D	3.42971	0.000412025	0.016906	up
XM_005694678.3	gene-PDE4D	PDE4D	-2.91546	7.78e-06	0.00043425	down
XM_018045991.1	gene-PDE4DIP	PDE4DIP	20.7016	8.39e-12	5.86e-10	up
XM_018045995.1	gene-PDE4DIP	PDE4DIP	23.2943	1.4e-14	4.03e-12	up
XM_018066186.1	gene-PDE8A	PDE8A	-2.53915	0.000443462	0.0180684	down
NM_001285732.1	gene-PDIA3	PDIA3	-0.605907	1.74e-05	0.000943471	down
XM_018049304.1	gene-PDLIM5	PDLIM5	22.4598	1.18e-13	1.77e-11	up
XM_018058224.1	gene-PDP1	PDP1	1.22323	0.000685316	0.0262548	up
XM_018040360.1	gene-PDPK1	PDPK1	-23.1599	2e-14	5.05e-12	down
XM_018051780.1	gene-PDXK	PDXK	-0.675376	0.000984167	0.0358764	down
XM_005678456.3	gene-PDZK1IP1	PDZK1IP1	23.8843	2.99e-15	1.38e-12	up
XM_018067086.1	gene-PDZRN3	PDZRN3	1.45611	0.000542123	0.0213504	up
XM_018067087.1	gene-PDZRN3	PDZRN3	3.98433	0.000155953	0.00717903	up
XM_018064610.1	gene-PER1	PER1	6.37204	5.27e-06	0.000300298	up
XR_001917236.1	gene-PER2	PER2	4.4121	8.38e-05	0.00406105	up
XM_018060358.1	gene-PEX14	PEX14	-3.99019	4.44e-05	0.00228154	down
XM_018047534.1	gene-PEX5L	PEX5L	-21.3461	1.86e-12	1.54e-10	down
XM_018056959.1	gene-PFKFB3	PFKFB3	20.7548	7.4e-12	5.23e-10	up
XM_018059432.1	gene-PGAP2	PGAP2	-24.2425	1.15e-15	6.92e-13	down
XM_018059434.1	gene-PGAP2	PGAP2	22.3812	1.44e-13	2.07e-11	up
XM_018059435.1	gene-PGAP2	PGAP2	21.5142	1.21e-12	1.11e-10	up
XR_001919614.1	gene-PGS1	PGS1	-9.05864	0.000273873	0.011833	down
XM_018064914.1	gene-PHB	PHB	5.22523	5.48e-05	0.00274838	up
XM_018053487.1	gene-PHF10	PHF10	2.91334	0.000499484	0.0199961	up
XM_018057793.1	gene-PHF20	PHF20	5.3418	9.11e-06	0.000507599	up
XM_018043851.1	gene-PHKA1	PHKA1	21.9988	3.71e-13	4.29e-11	up
XR_001917159.1	gene-PIAS2	PIAS2	-21.5615	1.1e-12	1.02e-10	down
NM_001314346.1	gene-PID1	PID1	1.306	0.00117964	0.0416526	up
XM_018064306.1	gene-PIGS	PIGS	-0.457322	0.000441656	0.0180033	down
XM_018046382.1	gene-PIGZ	PIGZ	20.8011	6.64e-12	4.72e-10	up
XM_018060180.1	gene-PIKFYVE	PIKFYVE	22.8704	4.18e-14	8.28e-12	up
XM_018048018.1	gene-PIP4K2C	PIP4K2C	-1.27321	0.000309313	0.0131493	down
XM_018061340.1	gene-PITPNM2	PITPNM2	-23.0194	2.88e-14	6.53e-12	down
XM_018057333.1	gene-PITRM1	PITRM1	-24.0812	1.77e-15	9.51e-13	down
XM_018058351.1	gene-PKHD1L1	PKHD1L1	-1.71235	5.29e-05	0.00266493	down
XM_018053000.1	gene-PKIB	PKIB	-21.4943	1.3e-12	1.16e-10	down
XR_001918124.1	gene-PLA2G6	PLA2G6	-8.64879	1.38e-08	8.69e-07	down
XM_018039171.1	gene-PLA2G7	PLA2G7	0.698004	3.79e-06	0.00021902	up
XM_018053296.1	gene-PLAGL1	PLAGL1	8.13571	3.07e-06	0.000178641	up
XM_018056908.1	gene-PLCB1	PLCB1	0.603723	0.000122667	0.00576853	up
XM_013968410.2	gene-PLCB4	PLCB4	3.25635	0.000119319	0.00562016	up
XM_018048609.1	gene-PLCH1	PLCH1	21.5025	1.25e-12	1.13e-10	up
XM_018053152.1	gene-PLCL2	PLCL2	20.7245	7.95e-12	5.56e-10	up
XM_018060274.1	gene-PLD5	PLD5	-1.98556	0.000617315	0.0239062	down
XM_018059600.1	gene-PLEKHA7	PLEKHA7	-23.7439	4.35e-15	1.83e-12	down
XM_018054039.1	gene-PLEKHD1	PLEKHD1	-1.15473	0.000104596	0.00497503	down
XM_018062243.1	gene-PLEKHF1	PLEKHF1	-4.77371	9.03e-05	0.00434522	down
XM_013971101.2	gene-PLEKHG2	PLEKHG2	20.8212	6.33e-12	4.53e-10	up
XM_018060589.1	gene-PLEKHM2	PLEKHM2	22.4217	1.28e-13	1.89e-11	up
XM_018039267.1	gene-PNPLA1	PNPLA1	-7.20613	5.33e-08	3.33e-06	down
XM_018051151.1	gene-PNPLA6	PNPLA6	-9.21226	1.23e-07	7.59e-06	down
XM_018051155.1	gene-PNPLA6	PNPLA6	-8.56612	5.72e-07	3.45e-05	down
XM_018051157.1	gene-PNPLA6	PNPLA6	-8.20061	6.55e-05	0.00322968	down
XM_018047491.1	gene-PODXL	PODXL	-0.740296	0.000507269	0.020215	down
XM_018046079.1	gene-POGZ	POGZ	22.2309	2.09e-13	2.72e-11	up
XM_018046080.1	gene-POGZ	POGZ	21.9785	3.9e-13	4.47e-11	up
XM_005685056.3	gene-POLK	POLK	-3.34877	0.000302862	0.0129172	down
XM_005687493.3	gene-POSTN	POSTN	1.40308	0.000102939	0.00490426	up
XM_018050172.1	gene-PPARGC1B	PPARGC1B	-25.3257	3.38e-21	4.21e-17	down
XM_018066241.1	gene-PPIP5K1	PPIP5K1	-8.41466	1.04e-05	0.000578386	down
XM_018066242.1	gene-PPIP5K1	PPIP5K1	-6.01415	2.91e-06	0.000170084	down
XM_018066244.1	gene-PPIP5K1	PPIP5K1	-9.62371	0.000165526	0.0075678	down
XM_013965802.2	gene-PPIP5K2	PPIP5K2	21.5942	9.98e-13	9.41e-11	up
XM_013965808.2	gene-PPIP5K2	PPIP5K2	21.533	1.16e-12	1.06e-10	up
XM_018038847.1	gene-PPP1R10	PPP1R10	-26.1791	5.12e-18	1.4e-14	down
XM_018047401.1	gene-PPP1R9A	PPP1R9A	21.9928	3.77e-13	4.34e-11	up
XM_018047405.1	gene-PPP1R9A	PPP1R9A	10.9545	0.000294955	0.0126188	up
XM_018052347.1	gene-PPP2R2A	PPP2R2A	-4.03976	2.57e-05	0.00136625	down
XM_018066066.1	gene-PPP2R5C	PPP2R5C	3.01489	0.00148029	0.0498572	up
XM_018048966.1	gene-PPP6R2	PPP6R2	-23.203	1.79e-14	4.66e-12	down
XM_018066455.1	gene-PRC1	PRC1	-7.95975	0.0013386	0.0460997	down
XM_018047907.1	gene-PRICKLE1	PRICKLE1	1.47975	0.00106738	0.0383645	up
XM_018055186.1	gene-PRKCE	PRKCE	0.274365	0.000382795	0.0158709	up
XM_013972803.2	gene-PRLR	PRLR	22.1871	2.33e-13	2.96e-11	up
XM_018052530.1	gene-PRMT2	PRMT2	-24.2826	1.03e-15	6.49e-13	down
XM_005677672.3	gene-PRPF3	PRPF3	-4.95365	0.000813463	0.0304945	down
XM_013962444.2	gene-PRPF3	PRPF3	-25.0043	1.43e-16	1.58e-13	down
XM_005684320.3	gene-PRPF4	PRPF4	-1.18988	0.000121777	0.00573284	down
XM_005684322.3	gene-PRPF4	PRPF4	0.792416	0.000986404	0.0359278	up
XM_013963347.2	gene-PRR15	PRR15	-0.442427	0.000931539	0.0342151	down
XM_018060298.1	gene-PRRC2C	PRRC2C	-3.67386	0.00145035	0.0489622	down
XM_018066829.1	gene-PRRT3	PRRT3	-1.97628	5.12e-05	0.00259488	down
XM_013965994.2	gene-PRUNE2	PRUNE2	-22.4159	1.33e-13	1.94e-11	down
XM_005699158.3	gene-PSAP	PSAP	-10.0005	6.34e-09	4.04e-07	down
XM_018041864.1	gene-PSD3	PSD3	1.10473	9.22e-05	0.00442847	up
XM_018055343.1	gene-PSD4	PSD4	-22.9491	3.43e-14	7.32e-12	down
XM_018060234.1	gene-PSEN2	PSEN2	-0.624013	0.000101852	0.00485776	down
XM_018050497.1	gene-PTBP1	PTBP1	-21.5473	1.14e-12	1.05e-10	down
XM_018052601.1	gene-PTBP3	PTBP3	4.76962	1.69e-05	0.000917412	up
NM_001314255.1	gene-PTGER2	PTGER2	-0.928564	1.6e-06	9.53e-05	down
XM_018066733.1	gene-PTH1R	PTH1R	22.6707	6.93e-14	1.17e-11	up
XM_018058619.1	gene-PTK2	PTK2	-21.7777	6.5e-13	6.85e-11	down
XM_018058620.1	gene-PTK2	PTK2	-21.6115	9.77e-13	9.23e-11	down
XM_018058621.1	gene-PTK2	PTK2	-22.4184	1.32e-13	1.94e-11	down
XM_018049692.1	gene-PTPN13	PTPN13	3.7589	7.72e-05	0.00376422	up
XM_018049693.1	gene-PTPN13	PTPN13	3.92414	5.57e-05	0.00278174	up
XM_018049694.1	gene-PTPN13	PTPN13	4.28712	1.68e-05	0.000915049	up
XM_018049695.1	gene-PTPN13	PTPN13	5.35285	1.25e-06	7.47e-05	up
XM_018049698.1	gene-PTPN13	PTPN13	4.21097	2.09e-05	0.00112205	up
XM_018061760.1	gene-PTPN4	PTPN4	-6.50064	5.54e-05	0.00276941	down
XM_018042923.1	gene-PTPRF	PTPRF	-1.28042	0.000180345	0.00816946	down
XM_018053191.1	gene-PTPRK	PTPRK	-24.9168	1.83e-16	1.7e-13	down
XM_018039452.1	gene-PTPRM	PTPRM	4.18376	0.000504786	0.0201528	up
XM_018055596.1	gene-PUM2	PUM2	9.55379	4.12e-07	2.5e-05	up
XM_005680666.3	gene-PVALB	PVALB	-22.3681	1.5e-13	2.13e-11	down
XM_018052739.1	gene-PXDN	PXDN	21.9436	4.25e-13	4.8e-11	up
XR_001918486.1	gene-PXDN	PXDN	-22.3524	1.54e-13	2.18e-11	down
XM_018066771.1	gene-PXK	PXK	-21.9066	4.73e-13	5.27e-11	down
XM_018046866.1	gene-RAB19	RAB19	22.6934	6.55e-14	1.12e-11	up
XM_005697258.3	gene-RAB27B	RAB27B	-0.523484	4.95e-05	0.00251497	down
XM_005694680.3	gene-RAB3C	RAB3C	-7.81537	0.000216273	0.00960111	down
XM_018064465.1	gene-RABEP1	RABEP1	10.6561	4.08e-05	0.00210047	up
XM_018065588.1	gene-RAI14	RAI14	-0.797226	0.00124532	0.0434183	down
XM_018066150.1	gene-RALGAPA1	RALGAPA1	-3.64356	0.00026251	0.0113985	down
XM_018055792.1	gene-RALGPS1	RALGPS1	-7.88481	9.22e-05	0.00442847	down
XM_018055794.1	gene-RALGPS1	RALGPS1	-7.84222	0.00142792	0.048411	down
XM_005693329.3	gene-RAP1GAP2	RAP1GAP2	-0.915767	0.000108653	0.00514558	down
XM_018064419.1	gene-RAP1GAP2	RAP1GAP2	-3.61833	0.000687804	0.026327	down
XM_018061493.1	gene-RAPGEF2	RAPGEF2	5.1114	2.02e-07	1.24e-05	up
XM_018061495.1	gene-RAPGEF2	RAPGEF2	-21.7431	6.83e-13	7.04e-11	down
XM_018064706.1	gene-RAPGEF4	RAPGEF4	22.4029	1.36e-13	1.98e-11	up
XM_005682632.3	gene-RAPGEF6	RAPGEF6	-23.6646	5.36e-15	2.14e-12	down
XM_013974828.2	gene-RBBP6	RBBP6	4.00801	0.00115125	0.0408947	up
XM_005681537.3	gene-RBM47	RBM47	-1.87526	0.000208031	0.00930147	down
XM_018041830.1	gene-RBPMS	RBPMS	6.3182	8.64e-09	5.48e-07	up
XM_018039084.1	gene-RCAN2	RCAN2	-0.641231	2.56e-05	0.001361	down
XM_018039085.1	gene-RCAN2	RCAN2	8.45178	1.08e-05	0.000595104	up
XM_005687450.3	gene-RCBTB2	RCBTB2	3.8449	0.000330774	0.0139866	up
XM_018056728.1	gene-RCBTB2	RCBTB2	23.8054	3.68e-15	1.61e-12	up
XM_013963965.2	gene-RDH5	RDH5	-1.54785	0.000730419	0.0277632	down
XM_018050434.1	gene-REEP6	REEP6	-1.3519	0.000903843	0.0334656	down
XM_018060396.1	gene-RERE	RERE	8.67042	0.000189966	0.00855071	up
XM_018047546.1	gene-RERG	RERG	1.37841	0.000236015	0.0103824	up
XM_018049801.1	gene-RGS12	RGS12	-24.143	1.5e-15	8.37e-13	down
XM_005684334.3	gene-RGS3	RGS3	-5.10233	0.000655427	0.0251983	down
XM_018052631.1	gene-RGS3	RGS3	-23.5286	7.66e-15	2.66e-12	down
XM_018054009.1	gene-RGS6	RGS6	21.7586	6.69e-13	6.99e-11	up
XM_018060278.1	gene-RGS7	RGS7	-4.50677	0.000302577	0.0129133	down
XM_005690946.2	gene-RGSL1	RGSL1	4.32061	0.00138135	0.047242	up
XM_018040863.1	gene-RHBDD2	RHBDD2	-3.09866	9.01e-05	0.00433787	down
XM_018063742.1	gene-RHBDF2	RHBDF2	-22.5503	9.5e-14	1.49e-11	down
XM_018066552.1	gene-RHCG	RHCG	-2.27569	3.11e-05	0.00162695	down
XM_005699065.3	gene-RHOBTB1	RHOBTB1	22.1937	2.29e-13	2.94e-11	up
XM_018064254.1	gene-RHOT1	RHOT1	22.9155	3.72e-14	7.69e-12	up
XM_018048516.1	gene-RIMKLB	RIMKLB	7.26412	6.8e-06	0.000382364	up
XM_013966825.2	gene-RIPK3	RIPK3	-22.5999	8.38e-14	1.34e-11	down
XM_018043856.1	gene-RLIM	RLIM	-22.1553	2.56e-13	3.19e-11	down
XM_018052420.1	gene-RMI1	RMI1	22.0518	3.26e-13	3.89e-11	up
XM_018039598.1	gene-RNF152	RNF152	-6.04694	0.000263933	0.0114489	down
XM_018039601.1	gene-RNF152	RNF152	-21.2954	2.1e-12	1.71e-10	down
XM_018052172.1	gene-RNF38	RNF38	3.56944	0.000475926	0.0191585	up
XM_018055648.1	gene-ROCK2	ROCK2	-5.91712	5.88e-05	0.00292386	down
XM_018055651.1	gene-ROCK2	ROCK2	23.6575	5.44e-15	2.16e-12	up
XM_018052768.1	gene-RORB	RORB	2.48496	0.000470588	0.0189874	up
XM_005693438.3	gene-RPAIN	RPAIN	1.3965	0.00125975	0.0437818	up
XM_018054422.1	gene-RPAP1	RPAP1	-9.13056	1.51e-15	8.37e-13	down
XM_018054424.1	gene-RPAP1	RPAP1	-1.38847	0.00115203	0.0408947	down
XM_018047886.1	gene-RPAP3	RPAP3	23.3753	1.14e-14	3.57e-12	up
XM_005687554.3	gene-RPL21	RPL21	-2.76978	0.00109497	0.0391506	down
XM_018057835.1	gene-RPN2	RPN2	-0.568151	5.24e-07	3.16e-05	down
XM_018043463.1	gene-RPS6KA4	RPS6KA4	-21.483	1.34e-12	1.19e-10	down
XM_018053830.1	gene-RPS6KA5	RPS6KA5	-22.7798	5.31e-14	9.66e-12	down
XM_018053832.1	gene-RPS6KA5	RPS6KA5	3.56538	0.000299553	0.0127967	up
XM_018042911.1	gene-RPS6KB2	RPS6KB2	22.6128	8.02e-14	1.3e-11	up
XM_018057504.1	gene-RTEL1	RTEL1	-5.7531	4.38e-07	2.66e-05	down
XM_018057506.1	gene-RTEL1	RTEL1	21.2569	2.25e-12	1.8e-10	up
XM_018057507.1	gene-RTEL1	RTEL1	22.1286	2.69e-13	3.33e-11	up
XM_018057509.1	gene-RTEL1	RTEL1	-23.0165	2.9e-14	6.53e-12	down
XM_005675055.2	gene-RUBCN	RUBCN	9.86168	0.00060325	0.023409	up
XM_018038794.1	gene-RUNX2	RUNX2	-22.7552	5.65e-14	1.01e-11	down
XM_018038795.1	gene-RUNX2	RUNX2	6.73249	6.24e-05	0.003091	up
XM_018052125.1	gene-RUSC2	RUSC2	-9.10416	0.000252157	0.0110258	down
XM_018052127.1	gene-RUSC2	RUSC2	5.49657	6.4e-05	0.00316648	up
XM_005701057.2	gene-S100G	S100G	7.10865	0.000895235	0.0332062	up
XM_018050900.1	gene-SAFB	SAFB	-5.61239	3.11e-05	0.00162695	down
XM_018050908.1	gene-SAFB2	SAFB2	20.2036	2.52e-11	1.65e-09	up
XM_005689134.3	gene-SAMD12	SAMD12	-1.21244	0.000265422	0.011502	down
XM_018065915.1	gene-SAP130	SAP130	21.719	7.23e-13	7.38e-11	up
XM_018053321.1	gene-SASH1	SASH1	8.77187	6.71e-06	0.000377503	up
XM_018059527.1	gene-SBF2	SBF2	4.55859	0.000275331	0.0118724	up
XM_005685067.3	gene-SCAMP1	SCAMP1	-2.05952	4.65e-05	0.00238059	down
XM_018047102.1	gene-SCRN1	SCRN1	6.49536	2.44e-05	0.00130014	up
XM_013970102.2	gene-SDCCAG8	SDCCAG8	20.9139	5.09e-12	3.72e-10	up
XM_018061181.1	gene-SDSL	SDSL	20.8886	5.4e-12	3.92e-10	up
XR_001918877.1	gene-SEC16A	SEC16A	-25.7256	1.89e-17	3.74e-14	down
XM_018052520.1	gene-SECISBP2	SECISBP2	9.00519	0.000239096	0.0105126	up
XM_018067130.1	gene-SEMA3F	SEMA3F	-1.39892	5.79e-08	3.61e-06	down
XM_018054164.1	gene-SEMA6D	SEMA6D	21.2976	2.04e-12	1.66e-10	up
XM_018054167.1	gene-SEMA6D	SEMA6D	-24.1763	1.37e-15	7.88e-13	down
XM_018053414.1	gene-SERAC1	SERAC1	-4.29597	0.000800487	0.0301116	down
XM_005695358.3	gene-SERPINA5	SERPINA5	-4.19395	3.33e-06	0.000193846	down
XM_013974466.2	gene-SERPINB11	SERPINB11	6.94048	0.000472422	0.0190526	up
XM_018039463.1	gene-SETBP1	SETBP1	3.75842	0.000495079	0.019838	up
XM_005684878.3	gene-SF3B5	SF3B5	-5.35643	4.93e-06	0.000282093	down
XM_018045247.1	gene-SGIP1	SGIP1	3.65094	0.000835838	0.0312527	up
XM_018053231.1	gene-SGK1	SGK1	1.25877	0.000433965	0.0177229	up
XM_018048806.1	gene-SGSM3	SGSM3	-26.2159	4.61e-18	1.34e-14	down
XM_018040868.1	gene-SH3BP4	SH3BP4	-0.997039	0.00123387	0.0431226	down
XM_018055940.1	gene-SH3GLB2	SH3GLB2	-22.2044	2.26e-13	2.91e-11	down
XM_018051795.1	gene-SH3RF1	SH3RF1	-8.48665	0.000879814	0.0326869	down
XM_018049000.1	gene-SHANK3	SHANK3	23.7618	4.13e-15	1.77e-12	up
XM_018049003.1	gene-SHANK3	SHANK3	-22.8117	4.89e-14	9.05e-12	down
XM_018049409.1	gene-SHISA3	SHISA3	-0.890398	0.00126044	0.043788	down
XM_018064770.1	gene-SHMT1	SHMT1	20.4932	1.37e-11	9.19e-10	up
XM_018050402.1	gene-SHROOM1	SHROOM1	-5.66483	0.000602917	0.023409	down
XM_018043828.1	gene-SHROOM2	SHROOM2	-5.56196	0.00043116	0.017632	down
XM_018049607.1	gene-SHROOM3	SHROOM3	-0.792927	0.00027353	0.011824	down
XM_018062923.1	gene-SIGLEC10	SIGLEC10	21.1153	3.16e-12	2.4e-10	up
XM_018042336.1	gene-SIPA1L2	SIPA1L2	-22.8413	4.54e-14	8.7e-12	down
XM_018039219.1	gene-SIRT5	SIRT5	-21.8881	4.96e-13	5.47e-11	down
XM_018050860.1	gene-SIRT6	SIRT6	-21.7284	7.33e-13	7.4e-11	down
XM_013967225.2	gene-SIX1	SIX1	2.10999	0.000924135	0.0340292	up
XM_018054169.1	gene-SLC12A1	SLC12A1	-1.41958	0.000560427	0.0219819	down
XM_013962525.2	gene-SLC16A1	SLC16A1	21.4731	1.34e-12	1.19e-10	up
XM_018058549.1	gene-SLC16A14	SLC16A14	0.812446	0.00117863	0.0416427	up
XM_005694147.3	gene-SLC16A5	SLC16A5	-6.10773	4.06e-05	0.00209401	down
XM_018062658.1	gene-SLC1A5	SLC1A5	-0.655434	0.00115294	0.0408947	down
XM_018041868.1	gene-SLC20A2	SLC20A2	-0.745521	0.000363431	0.0151835	down
XM_018067000.1	gene-SLC25A26	SLC25A26	-6.05588	0.000348019	0.0146166	down
XM_018052340.1	gene-SLC25A37	SLC25A37	0.519861	0.000271755	0.0117589	up
XM_005700178.3	gene-SLC25A53	SLC25A53	-21.4663	1.39e-12	1.22e-10	down
XM_005683160.3	gene-SLC26A2	SLC26A2	1.7082	0.00115437	0.0409015	up
XM_005683163.3	gene-SLC26A2	SLC26A2	1.22796	0.000629335	0.024313	up
XM_018050167.1	gene-SLC26A2	SLC26A2	-23.7493	4.29e-15	1.83e-12	down
XM_018050707.1	gene-SLC27A6	SLC27A6	1.73627	2.3e-05	0.00122535	up
XM_018060901.1	gene-SLC2A11	SLC2A11	-2.39237	7.87e-09	5e-07	down
XM_013964569.2	gene-SLC34A2	SLC34A2	-0.735822	2.76e-05	0.00145284	down
XM_018059194.1	gene-SLC35C1	SLC35C1	-21.6769	8.32e-13	8.12e-11	down
XM_018049965.1	gene-SLC39A3	SLC39A3	-23.2378	1.64e-14	4.36e-12	down
XM_018048082.1	gene-SLC39A5	SLC39A5	21.1283	3.06e-12	2.33e-10	up
XM_018059072.1	gene-SLC43A3	SLC43A3	21.7929	6.15e-13	6.56e-11	up
XM_005681740.3	gene-SLC4A4	SLC4A4	-5.22518	0.000410355	0.0168515	down
XM_018044781.1	gene-SLC6A8	SLC6A8	-0.308381	0.00144731	0.0488784	down
XM_018056611.1	gene-SLC7A1	SLC7A1	3.06066	0.00103049	0.037238	up
XM_005691243.3	gene-SLC7A11	SLC7A11	-1.11401	0.000960284	0.0351154	down
XM_018055162.1	gene-SLC8A1	SLC8A1	0.82994	0.0012337	0.0431226	up
XM_018062676.1	gene-SLC8A2	SLC8A2	3.94638	9.91e-06	0.000549187	up
XM_013969756.2	gene-SLCO2B1	SLCO2B1	6.41986	3.9e-05	0.00201912	up
XM_013969151.2	gene-SLCO5A1	SLCO5A1	-1.62659	7.82e-07	4.7e-05	down
XM_005687505.3	gene-SMAD9	SMAD9	-5.91079	3.86e-05	0.00199685	down
XM_005681418.3	gene-SMARCAD1	SMARCAD1	4.41705	0.000938563	0.0344296	up
XM_018059723.1	gene-SMARCAL1	SMARCAL1	-21.4013	1.63e-12	1.38e-10	down
XM_018053485.1	gene-SMOC2	SMOC2	0.844027	0.00111974	0.0399197	up
XM_018057381.1	gene-SMOX	SMOX	-21.4761	1.36e-12	1.21e-10	down
XM_005689770.3	gene-SMPD1	SMPD1	-0.887624	0.00090217	0.033432	down
XM_018044848.1	gene-SMPD4	SMPD4	-22.9641	3.31e-14	7.14e-12	down
XM_005679432.3	gene-SND1	SND1	-0.400851	0.000767314	0.0289888	down
XM_018057646.1	gene-SNPH	SNPH	3.67202	0.000107159	0.00508309	up
XM_018055195.1	gene-SOCS5	SOCS5	0.563831	9.91e-06	0.000549187	up
XM_013973217.2	gene-SP140	SP140	-23.288	1.42e-14	4.06e-12	down
XM_013973218.2	gene-SP140	SP140	-24.1294	1.56e-15	8.57e-13	down
XM_018058490.1	gene-SP140	SP140	-22.9988	2.99e-14	6.65e-12	down
XM_018044908.1	gene-SPECC1L	SPECC1L	-24.0704	1.82e-15	9.62e-13	down
XM_018061889.1	gene-SPG7	SPG7	2.59817	0.000544656	0.0214308	up
XM_018050346.1	gene-SPOCK1	SPOCK1	-1.42955	6.97e-10	4.5e-08	down
XM_005683081.3	gene-SPRY4	SPRY4	-1.19434	9.09e-10	5.86e-08	down
XM_018055893.1	gene-SPTAN1	SPTAN1	-23.7937	3.81e-15	1.66e-12	down
XM_018057840.1	gene-SRC	SRC	-0.732868	8.5e-05	0.00411146	down
XM_018040168.1	gene-SRCAP	SRCAP	-22.9668	3.29e-14	7.12e-12	down
XM_018060073.1	gene-SRGAP2	SRGAP2	21.7005	7.71e-13	7.66e-11	up
XM_018038363.1	gene-SRGAP3	SRGAP3	-0.707458	0.000455341	0.0184662	down
XR_001917220.1	gene-SRRM2	SRRM2	-10.2056	7.94e-09	5.04e-07	down
XR_001917221.1	gene-SRRM2	SRRM2	-4.2587	1.6e-05	0.00087033	down
[truncated: 209 more rows]

## Sheet: Table S7
Table S7. Differentially expressed mRNAs of Yunshang black goat ovaries at follicular phase.
transcript_id	gene_id	gene_name	log2.FoldChange.	pvalue	qvalue	Up/Down
XM_018066343.1	gene-EML1	EML1	10.0134	7.91e-25	6.86e-20	up
XM_018053196.1	gene-LAMA2	LAMA2	-29.4098	2.52e-22	1e-17	down
XM_018049668.1	gene-LIN54	LIN54	-9.4585	3.47e-22	1e-17	down
XM_018055900.1	gene-SPTAN1	SPTAN1	-29.099	6.87e-22	1.49e-17	down
Novel_011310	XLOC_125074	.	9.48609	1.32e-20	1.63e-16	up
NM_001314301.1	gene-SERPINA14	SERPINA14	-28.0644	1.8e-20	1.95e-16	down
Novel_024289	XLOC_254962	.	-27.8193	3.83e-20	3.7e-16	down
Novel_003602	XLOC_040680	.	-27.6425	6.58e-20	5.71e-16	down
XM_018041855.1	gene-FAT1	FAT1	-27.4246	1.28e-19	9.24e-16	down
XM_018058441.1	gene-CSPP1	CSPP1	10.4428	1.54e-19	1.03e-15	up
XM_018040529.1	gene-MKL2	MKL2	-27.0542	3.9e-19	2.42e-15	down
XM_018057353.1	gene-DIP2C	DIP2C	26.7995	8.31e-19	4.51e-15	up
XM_018055364.1	gene-IMMT	IMMT	-26.8048	8.19e-19	4.51e-15	down
XM_018045220.1	gene-LEPR	LEPR	-26.7757	8.93e-19	4.56e-15	down
XM_018053276.1	gene-ADGRG6	ADGRG6	-26.5792	1.59e-18	7.29e-15	down
XM_018038576.1	gene-RGL2	RGL2	-26.5892	1.55e-18	7.29e-15	down
XM_018055165.1	gene-EIF4G3	EIF4G3	-26.5032	1.99e-18	8.24e-15	down
XM_018048658.1	gene-WNK1	WNK1	-26.5095	1.96e-18	8.24e-15	down
Novel_013640	XLOC_150697	.	26.4758	2.16e-18	8.52e-15	up
XM_005691141.3	gene-MSMO1	MSMO1	11.7309	2.5e-18	9.44e-15	up
XM_013963004.2	gene-ZMYM1	ZMYM1	-7.46955	2.87e-18	1.04e-14	down
Novel_015803	XLOC_172018	.	-26.2553	4.11e-18	1.37e-14	down
Novel_021612	XLOC_221676	.	-26.073	6.97e-18	2.24e-14	down
XM_018063458.1	gene-BAZ2B	BAZ2B	-25.9982	8.64e-18	2.59e-14	down
Novel_005017	XLOC_053701	.	-26.0083	8.4e-18	2.59e-14	down
XM_018063447.1	gene-BAZ2B	BAZ2B	-25.9767	9.2e-18	2.66e-14	down
Novel_018665	XLOC_197356	.	23.6191	1.08e-17	3.03e-14	up
XM_005681308.3	gene-ELOVL6	ELOVL6	-25.8932	1.17e-17	3.13e-14	down
XM_018064465.1	gene-RABEP1	RABEP1	-25.8871	1.19e-17	3.13e-14	down
XM_018049167.1	gene-LOC102175526	LOC102175526	-25.855	1.3e-17	3.33e-14	down
XM_005695353.3	gene-SERPINA14	SERPINA14	-24.679	1.45e-17	3.49e-14	down
Novel_013412	XLOC_148253	.	-25.82	1.44e-17	3.49e-14	down
XM_018067137.1	gene-CLASP2	CLASP2	25.8041	1.51e-17	3.53e-14	up
XM_005682632.3	gene-RAPGEF6	RAPGEF6	-25.7876	1.58e-17	3.61e-14	down
XM_013962724.2	gene-PLA1A	PLA1A	-25.7768	1.63e-17	3.63e-14	down
XM_018048698.1	gene-CACNA1C	CACNA1C	23.1709	1.8e-17	3.78e-14	up
XM_013963424.2	gene-CADPS2	CADPS2	-25.7487	1.77e-17	3.78e-14	down
Novel_018503	XLOC_194799	.	-25.7367	1.83e-17	3.78e-14	down
XM_018048123.1	gene-ITGA7	ITGA7	-25.722	1.91e-17	3.85e-14	down
XM_018054885.1	gene-TMEM131	TMEM131	-25.6759	2.17e-17	4.27e-14	down
Novel_008296	XLOC_090063	.	-25.6701	2.21e-17	4.27e-14	down
XM_018045995.1	gene-PDE4DIP	PDE4DIP	-25.6567	2.3e-17	4.34e-14	down
XM_018049665.1	gene-TFDP2	TFDP2	25.6155	2.58e-17	4.76e-14	up
Novel_017568	XLOC_184727	.	-25.6052	2.66e-17	4.81e-14	down
XM_013965820.2	gene-TM4SF1	TM4SF1	-25.5937	2.75e-17	4.87e-14	down
XM_018047219.1	gene-NRCAM	NRCAM	-25.5409	3.19e-17	5.43e-14	down
XM_018048806.1	gene-SGSM3	SGSM3	25.5416	3.18e-17	5.43e-14	up
XM_018049410.1	gene-ATP8A1	ATP8A1	-25.4861	3.72e-17	6.22e-14	down
XM_013974580.2	gene-ABI3BP	ABI3BP	-25.3377	5.66e-17	8.77e-14	down
XM_018046874.1	gene-HIPK2	HIPK2	-25.3523	5.42e-17	8.77e-14	down
Novel_002777	XLOC_030723	.	25.3393	5.62e-17	8.77e-14	up
Novel_019745	XLOC_205770	.	25.3501	5.45e-17	8.77e-14	up
XM_018057054.1	gene-PARD3	PARD3	25.189	8.55e-17	1.28e-13	up
Novel_000917	XLOC_011906	.	-23.3817	8.98e-17	1.3e-13	down
Novel_011100	XLOC_122054	.	-25.1673	9.11e-17	1.3e-13	down
Novel_024201	XLOC_253603	.	-25.1695	9.06e-17	1.3e-13	down
XM_005696388.3	gene-ADGRF4	ADGRF4	-25.1383	9.88e-17	1.37e-13	down
Novel_002543	XLOC_029171	.	-25.0902	1.13e-16	1.53e-13	down
XM_018040427.1	gene-ABCA3	ABCA3	-25.0429	1.29e-16	1.72e-13	down
XM_018044576.1	gene-CASK	CASK	-25.0318	1.33e-16	1.73e-13	down
Novel_017297	XLOC_181409	.	-25.0302	1.33e-16	1.73e-13	down
XM_018044249.1	gene-LOC102182655	LOC102182655	-25.0187	1.38e-16	1.76e-13	down
XM_018057549.1	gene-ARFGAP1	ARFGAP1	-2.55335	1.53e-16	1.93e-13	down
XM_018065314.1	gene-TLK2	TLK2	24.947	1.68e-16	2.08e-13	up
XM_005700225.3	gene-COL4A5	COL4A5	24.9243	1.79e-16	2.12e-13	up
Novel_016969	XLOC_179370	.	24.928	1.77e-16	2.12e-13	up
XM_018041623.1	gene-GFRA1	GFRA1	-24.8479	2.21e-16	2.56e-13	down
XM_005677770.3	gene-PDE4DIP	PDE4DIP	24.8352	2.28e-16	2.61e-13	up
Novel_018589	XLOC_195930	.	-24.8199	2.39e-16	2.69e-13	down
XM_018042216.1	gene-ZMIZ1	ZMIZ1	24.7998	2.52e-16	2.74e-13	up
XM_018041466.1	gene-CPEB3	CPEB3	24.7475	2.9e-16	3.1e-13	up
XM_018044354.1	gene-GAK	GAK	-24.7462	2.92e-16	3.1e-13	down
XM_018038365.1	gene-SRGAP3	SRGAP3	-24.7417	2.96e-16	3.1e-13	down
Novel_016760	XLOC_177620	.	-24.721	3.13e-16	3.24e-13	down
XM_018063465.1	gene-BAZ2B	BAZ2B	-24.704	3.27e-16	3.31e-13	down
XM_018058346.1	gene-OXR1	OXR1	-24.6579	3.72e-16	3.68e-13	down
XM_013973217.2	gene-SP140	SP140	-24.6618	3.69e-16	3.68e-13	down
XM_005684732.3	gene-LAMA2	LAMA2	-24.6226	4.08e-16	3.98e-13	down
XM_018062990.1	gene-NEB	NEB	-24.585	4.55e-16	4.39e-13	down
Novel_000068	XLOC_001653	.	24.5409	5.11e-16	4.88e-13	up
XM_013965328.2	gene-KIF3A	KIF3A	-24.5348	5.21e-16	4.92e-13	down
XM_018053656.1	gene-CILP	CILP	-24.5292	5.29e-16	4.94e-13	down
XM_018043856.1	gene-RLIM	RLIM	-24.5221	5.4e-16	4.98e-13	down
XM_018049000.1	gene-SHANK3	SHANK3	24.5029	5.67e-16	5.12e-13	up
XM_018064495.1	gene-PELP1	PELP1	-24.4702	6.21e-16	5.51e-13	down
Novel_018879	XLOC_198531	.	24.4562	6.43e-16	5.59e-13	up
Novel_005882	XLOC_062142	.	23.4843	7.18e-16	6.12e-13	up
Novel_008445	XLOC_091728	.	24.411	7.26e-16	6.12e-13	up
XM_018045164.1	gene-ARMCX4	ARMCX4	24.4012	7.46e-16	6.14e-13	up
XM_018047928.1	gene-KIF21A	KIF21A	24.4056	7.38e-16	6.14e-13	up
XM_018052530.1	gene-PRMT2	PRMT2	24.3999	7.49e-16	6.14e-13	up
Novel_009703	XLOC_106617	.	-24.3966	7.59e-16	6.16e-13	down
XM_018066709.1	gene-PBRM1	PBRM1	-24.3704	8.15e-16	6.49e-13	down
XM_018043742.1	gene-XG	XG	24.3575	8.38e-16	6.61e-13	up
XM_018048700.1	gene-CACNA1C	CACNA1C	-24.345	8.73e-16	6.83e-13	down
XM_018063553.1	gene-LOC102168948	LOC102168948	-24.3223	9.28e-16	7.14e-13	down
XM_005692360.3	gene-ZNF569	ZNF569	24.3205	9.29e-16	7.14e-13	up
Novel_016023	XLOC_173567	.	-24.3033	9.77e-16	7.32e-13	down
Novel_018686	XLOC_197388	.	-24.3057	9.7e-16	7.32e-13	down
Novel_021533	XLOC_220534	.	24.2984	9.86e-16	7.32e-13	up
Novel_022474	XLOC_234071	.	23.7903	1.06e-15	7.83e-13	up
Novel_001638	XLOC_019568	.	-24.2461	1.14e-15	8.32e-13	down
Novel_011438	XLOC_126715	.	-24.2236	1.21e-15	8.74e-13	down
Novel_018499	XLOC_194799	.	-24.211	1.25e-15	8.97e-13	down
XM_018057765.1	gene-CEP250	CEP250	-24.2066	1.27e-15	9.02e-13	down
XM_013966405.2	gene-FAM184A	FAM184A	24.1608	1.42e-15	9.97e-13	up
Novel_019007	XLOC_199922	.	-24.1622	1.42e-15	9.97e-13	down
XM_005674791.3	gene-CADM2	CADM2	24.1341	1.53e-15	1.06e-12	up
Novel_023066	XLOC_239348	.	-24.1319	1.55e-15	1.07e-12	down
XM_018061500.1	gene-TRPC3	TRPC3	-24.1197	1.6e-15	1.09e-12	down
Novel_015534	XLOC_169841	.	-24.1188	1.6e-15	1.09e-12	down
XM_005686939.3	gene-ASXL2	ASXL2	-24.0643	1.86e-15	1.25e-12	down
XM_013972806.2	gene-PRLR	PRLR	-24.059	1.88e-15	1.26e-12	down
XM_013963846.2	gene-SLC38A4	SLC38A4	-24.0552	1.9e-15	1.26e-12	down
Novel_003652	XLOC_041379	.	-24.0498	1.93e-15	1.27e-12	down
Novel_013945	XLOC_154309	.	24.0273	2.04e-15	1.33e-12	up
XM_018052680.1	gene-TNC	TNC	-24.0141	2.12e-15	1.37e-12	down
Novel_011125	XLOC_122336	.	-24.0102	2.15e-15	1.37e-12	down
Novel_012068	XLOC_133321	.	24.0122	2.12e-15	1.37e-12	up
XM_018044990.1	gene-DOCK7	DOCK7	23.9881	2.26e-15	1.41e-12	up
Novel_002548	XLOC_029171	.	23.9897	2.26e-15	1.41e-12	up
XM_005699278.3	gene-FAM213A	FAM213A	-23.9845	2.3e-15	1.42e-12	down
XM_018039401.1	gene-MEF2D	MEF2D	23.9613	2.43e-15	1.49e-12	up
Novel_012072	XLOC_133337	.	-23.9498	2.52e-15	1.53e-12	down
Novel_009817	XLOC_108587	.	23.9298	2.65e-15	1.6e-12	up
XM_018051383.1	gene-SLC27A1	SLC27A1	23.9155	2.75e-15	1.65e-12	up
Novel_018154	XLOC_190818	.	22.3003	2.83e-15	1.67e-12	up
Novel_024275	XLOC_254591	.	23.9076	2.81e-15	1.67e-12	up
XM_018039641.1	gene-FHOD3	FHOD3	23.889	2.95e-15	1.72e-12	up
XM_018042438.1	gene-TARBP1	TARBP1	-23.8928	2.93e-15	1.72e-12	down
Novel_007915	XLOC_085758	.	-23.8761	3.07e-15	1.76e-12	down
Novel_010509	XLOC_116225	.	-23.8692	3.12e-15	1.77e-12	down
Novel_013947	XLOC_154309	.	23.8648	3.14e-15	1.77e-12	up
Novel_005960	XLOC_063033	.	-23.8562	3.23e-15	1.81e-12	down
XM_018054328.1	gene-HERC1	HERC1	-23.8433	3.35e-15	1.86e-12	down
Novel_003858	XLOC_042879	.	-23.8193	3.57e-15	1.97e-12	down
Novel_018461	XLOC_194641	.	23.8122	3.61e-15	1.99e-12	up
XM_018059523.1	gene-DENND5A	DENND5A	23.8048	3.69e-15	2.01e-12	up
XM_018039375.1	gene-KDSR	KDSR	-23.7994	3.76e-15	2.03e-12	down
XM_018063711.1	gene-TNRC6C	TNRC6C	23.7968	3.76e-15	2.03e-12	up
Novel_016472	XLOC_175974	.	23.7871	3.86e-15	2.07e-12	up
XM_018049404.1	gene-LIMCH1	LIMCH1	23.7769	3.97e-15	2.11e-12	up
XM_018043851.1	gene-PHKA1	PHKA1	-23.7767	3.99e-15	2.11e-12	down
XM_018046080.1	gene-POGZ	POGZ	23.7723	4.02e-15	2.11e-12	up
XM_018065297.1	gene-MAPT	MAPT	-23.7566	4.21e-15	2.2e-12	down
Novel_003369	XLOC_037151	.	-23.7537	4.24e-15	2.21e-12	down
Novel_002087	XLOC_024653	.	-23.7414	4.38e-15	2.27e-12	down
XM_018040526.1	gene-ARHGAP17	ARHGAP17	23.7172	4.64e-15	2.39e-12	up
XM_018047529.1	gene-DLX6	DLX6	-23.7152	4.7e-15	2.39e-12	down
Novel_010670	XLOC_117228	.	23.7121	4.71e-15	2.39e-12	up
Novel_020531	XLOC_213077	.	-23.7104	4.76e-15	2.4e-12	down
XM_018056987.1	gene-CELF2	CELF2	-23.7009	4.88e-15	2.43e-12	down
Novel_010516	XLOC_116251	.	22.3051	4.86e-15	2.43e-12	up
XM_013975774.2	gene-DLG2	DLG2	-23.6672	5.32e-15	2.6e-12	down
XM_018055365.1	gene-IMMT	IMMT	-23.6671	5.33e-15	2.6e-12	down
Novel_017777	XLOC_187689	.	-23.6709	5.28e-15	2.6e-12	down
XM_018050217.1	gene-PCDH1	PCDH1	23.6604	5.39e-15	2.62e-12	up
XM_018065134.1	gene-EZH1	EZH1	23.6461	5.57e-15	2.67e-12	up
XM_018043129.1	gene-LOC102180829	LOC102180829	-23.6531	5.53e-15	2.67e-12	down
Novel_011359	XLOC_125519	.	-23.6374	5.77e-15	2.75e-12	down
XM_018039525.1	gene-GREB1L	GREB1L	-23.6118	6.17e-15	2.91e-12	down
XM_018065347.1	gene-LOC102178567	LOC102178567	-23.6133	6.13e-15	2.91e-12	down
XR_001917234.1	gene-ATXN2L	ATXN2L	-23.5978	6.4e-15	2.92e-12	down
XM_018042860.1	gene-EHBP1L1	EHBP1L1	-23.6042	6.29e-15	2.92e-12	down
Novel_001075	XLOC_013211	.	23.6006	6.31e-15	2.92e-12	up
Novel_013562	XLOC_149924	.	23.5977	6.36e-15	2.92e-12	up
XM_018049740.1	gene-CPEB2	CPEB2	-23.5952	6.44e-15	2.93e-12	down
XM_018063853.1	gene-FDXR	FDXR	-23.593	6.48e-15	2.93e-12	down
Novel_008663	XLOC_095110	.	-23.587	6.58e-15	2.96e-12	down
Novel_015892	XLOC_172868	.	23.5748	6.75e-15	3.01e-12	up
XM_018047458.1	gene-SYNJ1	SYNJ1	23.563	6.94e-15	3.06e-12	up
Novel_018102	XLOC_190081	.	-23.5659	6.91e-15	3.06e-12	down
Novel_005672	XLOC_060402	.	-22.8737	7.39e-15	3.21e-12	down
Novel_012055	XLOC_133321	.	23.5395	7.41e-15	3.21e-12	up
Novel_017868	XLOC_188124	.	23.5406	7.39e-15	3.21e-12	up
Novel_018615	XLOC_195930	.	23.5379	7.44e-15	3.21e-12	up
XM_018050594.1	gene-FAM193B	FAM193B	23.5291	7.61e-15	3.22e-12	up
XM_018061389.1	gene-NCOR2	NCOR2	23.5297	7.6e-15	3.22e-12	up
Novel_021935	XLOC_225831	.	-23.5309	7.56e-15	3.22e-12	down
XR_001919874.1	gene-ULK3	ULK3	23.5015	8.18e-15	3.44e-12	up
Novel_005584	XLOC_058997	.	-23.5026	8.21e-15	3.44e-12	down
XM_018056087.1	gene-CCDC187	CCDC187	-23.493	8.42e-15	3.45e-12	down
XM_018042346.1	gene-CCSER2	CCSER2	-23.489	8.45e-15	3.45e-12	down
XM_018044130.1	gene-ZFYVE9	ZFYVE9	-23.5007	8.26e-15	3.45e-12	down
Novel_002546	XLOC_029171	.	23.4937	8.3e-15	3.45e-12	up
Novel_007457	XLOC_079446	.	-23.4949	8.38e-15	3.45e-12	down
Novel_012847	XLOC_143049	.	-23.4965	8.35e-15	3.45e-12	down
Novel_019120	XLOC_200424	.	-23.4877	8.52e-15	3.46e-12	down
Novel_008493	XLOC_092344	.	-23.4824	8.6e-15	3.47e-12	down
Novel_021085	XLOC_216272	.	-23.4833	8.64e-15	3.47e-12	down
Novel_017305	XLOC_181446	.	23.4656	8.94e-15	3.58e-12	up
XM_018067235.1	gene-TXNRD3	TXNRD3	-23.4654	9.05e-15	3.61e-12	down
Novel_022511	XLOC_234217	.	-23.4489	9.45e-15	3.73e-12	down
XM_018064435.1	gene-ATP2A3	ATP2A3	-23.4277	9.99e-15	3.9e-12	down
Novel_003264	XLOC_036292	.	-23.4272	1e-14	3.9e-12	down
Novel_017527	XLOC_184129	.	-23.4241	1.01e-14	3.91e-12	down
Novel_019761	XLOC_205797	.	23.4184	1.02e-14	3.92e-12	up
Novel_022032	XLOC_227771	.	-23.4162	1.03e-14	3.96e-12	down
Novel_018265	XLOC_191736	.	-23.4103	1.05e-14	3.97e-12	down
XM_018042378.1	gene-CAMK2G	CAMK2G	23.3987	1.06e-14	4.01e-12	up
Novel_008690	XLOC_095304	.	-23.401	1.07e-14	4.02e-12	down
Novel_018881	XLOC_198531	.	23.3967	1.08e-14	4.02e-12	up
XM_018040573.1	gene-LMTK2	LMTK2	23.3673	1.15e-14	4.3e-12	up
XM_018060651.1	gene-FAM20B	FAM20B	-23.3699	1.16e-14	4.31e-12	down
Novel_023329	XLOC_243786	.	-23.368	1.17e-14	4.31e-12	down
Novel_014082	XLOC_155379	.	-23.3651	1.18e-14	4.33e-12	down
Novel_004673	XLOC_050842	.	-23.3582	1.19e-14	4.37e-12	down
XR_001918296.1	gene-TMCO6	TMCO6	-23.3521	1.22e-14	4.44e-12	down
Novel_008157	XLOC_089304	.	23.3392	1.25e-14	4.54e-12	up
Novel_002551	XLOC_029171	.	23.3359	1.26e-14	4.56e-12	up
Novel_005675	XLOC_060455	.	-23.3337	1.28e-14	4.6e-12	down
Novel_001962	XLOC_023702	.	23.3205	1.31e-14	4.69e-12	up
Novel_014651	XLOC_160094	.	-23.3228	1.31e-14	4.69e-12	down
Novel_000324	XLOC_003936	.	-23.2851	1.45e-14	5.15e-12	down
Novel_002431	XLOC_028339	.	-23.2808	1.46e-14	5.19e-12	down
Novel_004042	XLOC_046051	.	-23.275	1.49e-14	5.25e-12	down
XM_005675149.3	gene-ADIPOQ	ADIPOQ	-23.2673	1.51e-14	5.32e-12	down
Novel_017841	XLOC_188067	.	-23.2657	1.52e-14	5.33e-12	down
XM_018059015.1	gene-STX3	STX3	23.254	1.56e-14	5.43e-12	up
XM_018065249.1	gene-ADAM11	ADAM11	-23.2546	1.57e-14	5.45e-12	down
XM_018055746.1	gene-DENND1A	DENND1A	-23.2481	1.59e-14	5.52e-12	down
Novel_002030	XLOC_024263	.	-23.2392	1.63e-14	5.58e-12	down
Novel_005255	XLOC_056198	.	-23.2404	1.63e-14	5.58e-12	down
Novel_008428	XLOC_091366	.	-23.2385	1.63e-14	5.58e-12	down
XM_018046612.1	gene-P3H2	P3H2	-23.2223	1.7e-14	5.73e-12	down
XR_001917575.1	gene-PRRG1	PRRG1	-23.2271	1.68e-14	5.73e-12	down
Novel_004101	XLOC_047163	.	-23.2234	1.7e-14	5.73e-12	down
Novel_017443	XLOC_182807	.	-23.2236	1.7e-14	5.73e-12	down
Novel_004127	XLOC_047257	.	-23.2167	1.73e-14	5.8e-12	down
Novel_013603	XLOC_150296	.	23.2109	1.74e-14	5.8e-12	up
Novel_007749	XLOC_083923	.	-23.2118	1.75e-14	5.83e-12	down
XM_018060545.1	gene-ACAP3	ACAP3	23.2049	1.77e-14	5.84e-12	up
Novel_008231	XLOC_089630	.	23.2056	1.77e-14	5.84e-12	up
Novel_024355	XLOC_255908	.	23.2033	1.78e-14	5.84e-12	up
Novel_019940	XLOC_207045	.	-23.1953	1.83e-14	5.99e-12	down
XM_005688307.3	gene-STX16	STX16	23.1798	1.89e-14	6.16e-12	up
XM_018050970.1	gene-CEP63	CEP63	-23.1796	1.9e-14	6.18e-12	down
XM_013966404.2	gene-FAM184A	FAM184A	23.1739	1.92e-14	6.18e-12	up
Novel_003304	XLOC_036645	.	23.1744	1.91e-14	6.18e-12	up
Novel_000246	XLOC_002855	.	-23.175	1.93e-14	6.2e-12	down
XM_018058537.1	gene-ATAD2	ATAD2	23.1652	1.96e-14	6.28e-12	up
Novel_015485	XLOC_169638	.	21.3339	1.98e-14	6.32e-12	up
XM_018056988.1	gene-CELF2	CELF2	-23.1618	1.99e-14	6.33e-12	down
Novel_019102	XLOC_200413	.	23.1576	2e-14	6.33e-12	up
Novel_000557	XLOC_005725	.	-23.1458	2.08e-14	6.56e-12	down
XM_018043541.1	gene-ANO5	ANO5	-23.1396	2.11e-14	6.64e-12	down
XM_005685180.3	gene-PARP6	PARP6	-23.1363	2.12e-14	6.65e-12	down
XM_018042859.1	gene-EHBP1L1	EHBP1L1	-23.1253	2.19e-14	6.68e-12	down
Novel_002430	XLOC_028339	.	23.1228	2.19e-14	6.68e-12	up
Novel_005743	XLOC_060992	.	-23.1284	2.17e-14	6.68e-12	down
Novel_018101	XLOC_190081	.	23.1285	2.15e-14	6.68e-12	up
Novel_022160	XLOC_229303	.	-23.1271	2.18e-14	6.68e-12	down
Novel_014154	XLOC_155933	.	-23.1159	2.24e-14	6.8e-12	down
XM_018038347.1	gene-CADPS	CADPS	23.108	2.27e-14	6.87e-12	up
XM_018039601.1	gene-RNF152	RNF152	-23.103	2.31e-14	6.93e-12	down
XM_018057741.1	gene-TP53INP2	TP53INP2	23.1004	2.32e-14	6.93e-12	up
Novel_019923	XLOC_206890	.	23.1004	2.32e-14	6.93e-12	up
Novel_014768	XLOC_160617	.	-23.0966	2.36e-14	7.04e-12	down
XM_018060212.1	gene-ENAH	ENAH	-23.0879	2.41e-14	7.15e-12	down
Novel_014856	XLOC_162834	.	-23.0891	2.41e-14	7.15e-12	down
Novel_018504	XLOC_194799	.	-23.0847	2.43e-14	7.19e-12	down
XM_018054556.1	gene-SALL2	SALL2	-23.0828	2.44e-14	7.2e-12	down
Novel_013838	XLOC_153285	.	-23.0811	2.46e-14	7.2e-12	down
XM_018060100.1	gene-MAP2	MAP2	23.0653	2.53e-14	7.38e-12	up
Novel_001698	XLOC_019913	.	23.0435	2.68e-14	7.78e-12	up
Novel_007971	XLOC_086619	.	-23.0436	2.7e-14	7.8e-12	down
Novel_019250	XLOC_201020	.	23.0407	2.7e-14	7.8e-12	up
Novel_005135	XLOC_054957	.	23.038	2.72e-14	7.81e-12	up
Novel_013751	XLOC_151796	.	-23.0409	2.72e-14	7.81e-12	down
XM_018066072.1	gene-MARK3	MARK3	-23.0305	2.77e-14	7.85e-12	down
Novel_015067	XLOC_164412	.	-23.0338	2.77e-14	7.85e-12	down
Novel_020680	XLOC_213960	.	-23.037	2.75e-14	7.85e-12	down
Novel_004121	XLOC_047257	.	23.025	2.8e-14	7.89e-12	up
XM_018043308.1	gene-SNX19	SNX19	-23.018	2.86e-14	8.02e-12	down
Novel_016787	XLOC_177691	.	-23.0076	2.97e-14	8.26e-12	down
Novel_009288	XLOC_102060	.	-22.9955	3.06e-14	8.46e-12	down
Novel_014229	XLOC_156513	.	22.9865	3.08e-14	8.48e-12	up
XM_018046320.1	gene-ARHGEF11	ARHGEF11	-22.9888	3.11e-14	8.56e-12	down
XM_018057761.1	gene-CEP250	CEP250	-22.987	3.13e-14	8.57e-12	down
Novel_005879	XLOC_062142	.	22.978	3.17e-14	8.57e-12	up
Novel_009384	XLOC_103091	.	-22.9792	3.16e-14	8.57e-12	down
XM_018066104.1	gene-MAN2A2	MAN2A2	-22.9788	3.2e-14	8.59e-12	down
XM_018053466.1	gene-UNC93A	UNC93A	-22.9784	3.2e-14	8.59e-12	down
Novel_016089	XLOC_173987	.	22.9688	3.25e-14	8.7e-12	up
XM_013969267.2	gene-SYBU	SYBU	-22.9704	3.26e-14	8.72e-12	down
Novel_006493	XLOC_069096	.	22.9629	3.3e-14	8.78e-12	up
Novel_009548	XLOC_104845	.	22.9454	3.45e-14	9.09e-12	up
XM_018061991.1	gene-AKTIP	AKTIP	-22.9473	3.46e-14	9.11e-12	down
XM_018043255.1	gene-CTTN	CTTN	-22.9396	3.53e-14	9.26e-12	down
XM_018043848.1	gene-PHKA1	PHKA1	22.9349	3.54e-14	9.26e-12	up
XM_018054838.1	gene-ADRA2B	ADRA2B	-22.93	3.62e-14	9.44e-12	down
Novel_017134	XLOC_180119	.	-22.9284	3.63e-14	9.44e-12	down
Novel_023409	XLOC_245484	.	22.9078	3.79e-14	9.83e-12	up
Novel_006838	XLOC_071305	.	-22.9102	3.81e-14	9.84e-12	down
Novel_020504	XLOC_212966	.	-22.9054	3.85e-14	9.91e-12	down
XM_018055154.1	gene-MAP4K3	MAP4K3	-22.8992	3.92e-14	1.01e-11	down
XM_018054319.1	gene-USP3	USP3	-22.887	4.04e-14	1.03e-11	down
Novel_002900	XLOC_032308	.	-22.8869	4.04e-14	1.03e-11	down
Novel_011547	XLOC_128300	.	-22.8877	4.03e-14	1.03e-11	down
Novel_013872	XLOC_153488	.	-22.888	4.03e-14	1.03e-11	down
Novel_002973	XLOC_033602	.	22.8739	4.14e-14	1.04e-11	up
XM_018039188.1	gene-FGD2	FGD2	-22.8701	4.22e-14	1.06e-11	down
Novel_007150	XLOC_076957	.	-22.8679	4.24e-14	1.06e-11	down
Novel_018592	XLOC_195930	.	-22.8686	4.24e-14	1.06e-11	down
Novel_019705	XLOC_205408	.	22.854	4.35e-14	1.09e-11	up
Novel_019828	XLOC_206262	.	-22.8565	4.37e-14	1.09e-11	down
XM_018061604.1	gene-ARFIP1	ARFIP1	-22.8494	4.45e-14	1.1e-11	down
XM_018067244.1	gene-CSRNP1	CSRNP1	-22.8508	4.43e-14	1.1e-11	down
XM_018062067.1	gene-GINS3	GINS3	-22.8377	4.58e-14	1.12e-11	down
XM_018066932.1	gene-PTPRG	PTPRG	22.8373	4.54e-14	1.12e-11	up
XM_018061618.1	gene-TRIM2	TRIM2	-22.8349	4.62e-14	1.12e-11	down
Novel_006986	XLOC_075400	.	22.8307	4.62e-14	1.12e-11	up
Novel_019407	XLOC_202796	.	-22.8359	4.61e-14	1.12e-11	down
Novel_021026	XLOC_215940	.	22.3796	4.57e-14	1.12e-11	up
XM_018047239.1	gene-ATXN7L1	ATXN7L1	22.8232	4.71e-14	1.14e-11	up
XM_018058490.1	gene-SP140	SP140	-22.8222	4.74e-14	1.14e-11	down
XM_018046745.1	gene-LOC108635821	LOC108635821	-22.8184	4.82e-14	1.15e-11	down
Novel_015640	XLOC_170448	.	22.8164	4.79e-14	1.15e-11	up
XM_018039219.1	gene-SIRT5	SIRT5	-22.8144	4.87e-14	1.16e-11	down
Novel_007740	XLOC_083832	.	22.8042	4.94e-14	1.17e-11	up
XM_018044662.1	gene-FGFRL1	FGFRL1	-22.8027	5.01e-14	1.19e-11	down
Novel_020953	XLOC_215622	.	-22.7992	5.05e-14	1.19e-11	down
Novel_023326	XLOC_243786	.	-22.7978	5.08e-14	1.19e-11	down
Novel_023723	XLOC_249028	.	-22.7973	5.08e-14	1.19e-11	down
XM_018059823.1	gene-EXPH5	EXPH5	-22.7752	5.38e-14	1.25e-11	down
Novel_013364	XLOC_148110	.	22.7703	5.38e-14	1.25e-11	up
Novel_014099	XLOC_155563	.	22.7681	5.41e-14	1.25e-11	up
Novel_014461	XLOC_158763	.	22.7716	5.37e-14	1.25e-11	up
XM_018056000.1	gene-PRRC2B	PRRC2B	22.7634	5.48e-14	1.27e-11	up
Novel_020669	XLOC_213886	.	-22.7419	5.85e-14	1.34e-11	down
XM_018054805.1	gene-ANAPC1	ANAPC1	-22.7292	5.96e-14	1.36e-11	down
XM_018059477.1	gene-DCHS1	DCHS1	-22.7326	5.99e-14	1.37e-11	down
Novel_012807	XLOC_142671	.	-22.7236	6.13e-14	1.39e-11	down
XM_018060994.1	gene-MTMR3	MTMR3	22.7107	6.26e-14	1.42e-11	up
XR_001917536.1	gene-LURAP1	LURAP1	-22.7067	6.4e-14	1.44e-11	down
XM_018042329.1	gene-ERCC6	ERCC6	22.6954	6.51e-14	1.45e-11	up
XM_018045239.1	gene-PDE4B	PDE4B	22.6954	6.51e-14	1.45e-11	up
Novel_010166	XLOC_112286	.	-22.6968	6.56e-14	1.46e-11	down
Novel_023474	XLOC_246411	.	-22.6972	6.56e-14	1.46e-11	down
Novel_001717	XLOC_020029	.	-22.6872	6.73e-14	1.48e-11	down
Novel_022405	XLOC_232273	.	22.6813	6.73e-14	1.48e-11	up
Novel_023184	XLOC_240818	.	22.6862	6.66e-14	1.48e-11	up
XM_018042423.1	gene-KCNMA1	KCNMA1	-22.6689	7.05e-14	1.53e-11	down
XM_018042144.1	gene-LOC102169353	LOC102169353	22.6659	7.01e-14	1.53e-11	up
XM_005677775.3	gene-PDE4DIP	PDE4DIP	22.6678	6.97e-14	1.53e-11	up
XM_018053158.1	gene-PLCL2	PLCL2	-22.6689	7.05e-14	1.53e-11	down
XM_013967069.2	gene-TRIM9	TRIM9	-22.6704	7.02e-14	1.53e-11	down
Novel_008309	XLOC_090307	.	-22.6637	7.14e-14	1.54e-11	down
Novel_020975	XLOC_215713	.	-22.6661	7.1e-14	1.54e-11	down
XM_018047983.1	gene-TBC1D30	TBC1D30	22.6501	7.23e-14	1.56e-11	up
Novel_004075	XLOC_046741	.	22.6519	7.27e-14	1.56e-11	up
XM_013972199.2	gene-CHRNB1	CHRNB1	-22.6505	7.38e-14	1.57e-11	down
XM_018066662.1	gene-IP6K1	IP6K1	22.6459	7.38e-14	1.57e-11	up
XM_018045991.1	gene-PDE4DIP	PDE4DIP	-22.6534	7.33e-14	1.57e-11	down
Novel_006701	XLOC_070746	.	-22.6502	7.39e-14	1.57e-11	down
Novel_009775	XLOC_108020	.	22.6389	7.51e-14	1.59e-11	up
Novel_021095	XLOC_216306	.	22.6387	7.51e-14	1.59e-11	up
Novel_014152	XLOC_155933	.	-22.6362	7.59e-14	1.6e-11	down
XM_013969392.2	gene-PDGFD	PDGFD	-22.6279	7.82e-14	1.64e-11	down
XM_018041227.1	gene-TCF7L2	TCF7L2	-22.6185	8.01e-14	1.66e-11	down
XM_018052073.1	gene-TRPM6	TRPM6	22.6159	7.96e-14	1.66e-11	up
Novel_000119	XLOC_001906	.	22.6176	7.92e-14	1.66e-11	up
Novel_008215	XLOC_089630	.	22.617	7.94e-14	1.66e-11	up
Novel_021447	XLOC_219389	.	-22.6181	8.01e-14	1.66e-11	down
Novel_003433	XLOC_037944	.	-22.608	8.22e-14	1.7e-11	down
Novel_008985	XLOC_099602	.	-22.6055	8.27e-14	1.71e-11	down
XM_018060998.1	gene-MTMR3	MTMR3	22.5854	8.59e-14	1.75e-11	up
XM_018061612.1	gene-TRIM2	TRIM2	22.5913	8.47e-14	1.75e-11	up
XM_018039516.1	gene-ZNF532	ZNF532	22.5809	8.6e-14	1.75e-11	up
Novel_002006	XLOC_023973	.	-22.593	8.54e-14	1.75e-11	down
Novel_004214	XLOC_047560	.	22.5905	8.48e-14	1.75e-11	up
Novel_009613	XLOC_105804	.	22.5851	8.56e-14	1.75e-11	up
Novel_014734	XLOC_160422	.	22.5822	8.65e-14	1.76e-11	up
XM_018050132.1	gene-LOC102191423	LOC102191423	-22.5818	8.7e-14	1.77e-11	down
Novel_007207	XLOC_077830	.	-22.5826	8.77e-14	1.77e-11	down
Novel_013663	XLOC_150856	.	-22.5768	8.9e-14	1.79e-11	down
Novel_018598	XLOC_195930	.	22.5739	8.85e-14	1.79e-11	up
Novel_004487	XLOC_049510	.	22.5553	9.27e-14	1.86e-11	up
Novel_020392	XLOC_211297	.	22.5569	9.23e-14	1.86e-11	up
XM_018042374.1	gene-CAMK2G	CAMK2G	22.5494	9.41e-14	1.87e-11	up
XM_018057468.1	gene-COL16A1	COL16A1	-22.5551	9.36e-14	1.87e-11	down
Novel_011738	XLOC_130441	.	-22.5558	9.38e-14	1.87e-11	down
Novel_014268	XLOC_156874	.	22.5448	9.52e-14	1.89e-11	up
Novel_005583	XLOC_058997	.	-22.5426	9.7e-14	1.91e-11	down
Novel_015290	XLOC_166981	.	-22.5406	9.63e-14	1.91e-11	down
XM_013974426.2	gene-ST8SIA5	ST8SIA5	-22.53	1e-13	1.96e-11	down
Novel_016868	XLOC_178468	.	22.5258	9.98e-14	1.96e-11	up
Novel_000597	XLOC_006146	.	-22.5264	1.01e-13	1.97e-11	down
Novel_016808	XLOC_177910	.	22.5205	1.01e-13	1.97e-11	up
XM_018054873.1	gene-TMCO4	TMCO4	22.518	1.02e-13	1.98e-11	up
Novel_008417	XLOC_091212	.	-22.5244	1.01e-13	1.98e-11	down
XM_018057832.1	gene-RBL1	RBL1	-22.5178	1.03e-13	2e-11	down
Novel_004896	XLOC_053070	.	-22.5118	1.05e-13	2.02e-11	down
Novel_010163	XLOC_112286	.	-22.5118	1.05e-13	2.02e-11	down
XM_018042139.1	gene-LOC102169353	LOC102169353	22.5039	1.06e-13	2.03e-11	up
XM_018048709.1	gene-BCL2L13	BCL2L13	-22.5057	1.06e-13	2.04e-11	down
Novel_005820	XLOC_061643	.	22.4976	1.07e-13	2.05e-11	up
Novel_006890	XLOC_071564	.	22.494	1.08e-13	2.06e-11	up
Novel_010408	XLOC_115507	.	-22.5009	1.08e-13	2.06e-11	down
Novel_003010	XLOC_033981	.	-22.4925	1.09e-13	2.07e-11	down
Novel_001577	XLOC_019107	.	-22.4923	1.1e-13	2.08e-11	down
Novel_020293	XLOC_210471	.	22.4836	1.11e-13	2.09e-11	up
Novel_021197	XLOC_217002	.	22.483	1.11e-13	2.09e-11	up
XM_018038403.1	gene-LRRC2	LRRC2	-22.4746	1.13e-13	2.13e-11	down
Novel_017854	XLOC_188067	.	-22.474	1.14e-13	2.14e-11	down
Novel_023228	XLOC_241361	.	-22.4714	1.16e-13	2.17e-11	down
Novel_004744	XLOC_051176	.	-22.4658	1.18e-13	2.19e-11	down
Novel_005840	XLOC_061800	.	-22.4661	1.18e-13	2.19e-11	down
Novel_007406	XLOC_078763	.	-22.4558	1.2e-13	2.23e-11	down
XM_018047618.1	gene-LUM	LUM	-22.4503	1.22e-13	2.26e-11	down
XM_013965690.2	gene-MBNL1	MBNL1	22.4412	1.23e-13	2.26e-11	up
XM_013970102.2	gene-SDCCAG8	SDCCAG8	22.4461	1.22e-13	2.26e-11	up
Novel_019249	XLOC_201020	.	-22.4503	1.22e-13	2.26e-11	down
XR_001917324.1	gene-ADAM12	ADAM12	-22.4304	1.27e-13	2.28e-11	down
XM_018066610.1	gene-ASPG	ASPG	-22.4341	1.27e-13	2.28e-11	down
XM_018060924.1	gene-DEPDC5	DEPDC5	22.4343	1.26e-13	2.28e-11	up
XM_005676452.3	gene-MAP2	MAP2	22.4275	1.26e-13	2.28e-11	up
XM_013973917.2	gene-MLIP	MLIP	-22.4298	1.27e-13	2.28e-11	down
XM_005697806.3	gene-ORAI2	ORAI2	-22.4403	1.26e-13	2.28e-11	down
XM_018042261.1	gene-RASSF4	RASSF4	-22.4394	1.26e-13	2.28e-11	down
Novel_004878	XLOC_053070	.	-22.4308	1.27e-13	2.28e-11	down
Novel_015131	XLOC_165465	.	-22.4388	1.26e-13	2.28e-11	down
Novel_016630	XLOC_177005	.	-22.4388	1.26e-13	2.28e-11	down
Novel_016718	XLOC_177462	.	-22.4304	1.27e-13	2.28e-11	down
Novel_017849	XLOC_188067	.	22.4309	1.27e-13	2.28e-11	up
Novel_018590	XLOC_195930	.	-22.4429	1.24e-13	2.28e-11	down
XR_001919305.1	gene-FAAP20	FAAP20	-22.4282	1.29e-13	2.31e-11	down
Novel_019269	XLOC_201478	.	-22.427	1.3e-13	2.31e-11	down
XR_001918487.1	gene-PXDN	PXDN	-22.4234	1.31e-13	2.32e-11	down
XM_018059251.1	gene-EHF	EHF	-22.418	1.33e-13	2.33e-11	down
Novel_000336	XLOC_004060	.	22.4147	1.32e-13	2.33e-11	up
Novel_001833	XLOC_021073	.	22.4127	1.33e-13	2.33e-11	up
Novel_008031	XLOC_087901	.	-22.418	1.33e-13	2.33e-11	down
Novel_016029	XLOC_173611	.	22.4061	1.35e-13	2.37e-11	up
Novel_014542	XLOC_159302	.	22.3989	1.37e-13	2.4e-11	up
XR_001917299.1	gene-GIGYF2	GIGYF2	22.3952	1.39e-13	2.41e-11	up
XM_018054984.1	gene-LOXL3	LOXL3	22.3956	1.38e-13	2.41e-11	up
Novel_012571	XLOC_139456	.	22.393	1.39e-13	2.41e-11	up
Novel_014749	XLOC_160470	.	22.3922	1.39e-13	2.41e-11	up
XM_018057487.1	gene-COL16A1	COL16A1	-22.3962	1.4e-13	2.43e-11	down
XM_018043126.1	gene-LOC102180829	LOC102180829	-22.3922	1.42e-13	2.44e-11	down
Novel_014273	XLOC_156874	.	22.3836	1.41e-13	2.44e-11	up
Novel_023377	XLOC_244814	.	-22.3922	1.42e-13	2.44e-11	down
Novel_008048	XLOC_087906	.	22.3819	1.43e-13	2.46e-11	up
Novel_019111	XLOC_200423	.	22.3777	1.44e-13	2.48e-11	up
XM_005676200.3	gene-ACMSD	ACMSD	-22.3749	1.48e-13	2.51e-11	down
Novel_008412	XLOC_091197	.	22.3699	1.48e-13	2.51e-11	up
Novel_022328	XLOC_231484	.	22.3691	1.48e-13	2.51e-11	up
XM_018039675.1	gene-CTDP1	CTDP1	22.3656	1.49e-13	2.53e-11	up
Novel_007058	XLOC_076203	.	-22.3705	1.5e-13	2.53e-11	down
Novel_007025	XLOC_075829	.	-22.3593	1.54e-13	2.6e-11	down
XM_018066775.1	gene-MAP4	MAP4	22.3481	1.56e-13	2.62e-11	up
Novel_010263	XLOC_113724	.	-22.3542	1.56e-13	2.62e-11	down
Novel_016403	XLOC_175656	.	-22.3532	1.56e-13	2.62e-11	down
Novel_018596	XLOC_195930	.	-22.3356	1.63e-13	2.73e-11	down
Novel_006274	XLOC_066481	.	-22.3338	1.64e-13	2.74e-11	down
Novel_020298	XLOC_210471	.	-22.3324	1.64e-13	2.74e-11	down
Novel_005703	XLOC_060690	.	22.3232	1.66e-13	2.76e-11	up
Novel_008703	XLOC_095447	.	-22.3234	1.68e-13	2.79e-11	down
Novel_013085	XLOC_145137	.	-22.3242	1.68e-13	2.79e-11	down
Novel_004156	XLOC_047463	.	22.3143	1.7e-13	2.8e-11	up
XM_018057986.1	gene-ZMYND8	ZMYND8	22.3096	1.72e-13	2.83e-11	up
XM_018055893.1	gene-SPTAN1	SPTAN1	-22.3141	1.72e-13	2.84e-11	down
XM_018063316.1	gene-LRFN3	LRFN3	-22.3123	1.73e-13	2.85e-11	down
Novel_007800	XLOC_084326	.	22.3017	1.75e-13	2.87e-11	up
Novel_013564	XLOC_149924	.	22.2989	1.76e-13	2.88e-11	up
Novel_013612	XLOC_150352	.	22.3	1.76e-13	2.88e-11	up
Novel_015670	XLOC_170570	.	-22.2992	1.79e-13	2.91e-11	down
Novel_019773	XLOC_205829	.	22.2883	1.8e-13	2.93e-11	up
XM_018041977.1	gene-ANK1	ANK1	-22.288	1.84e-13	2.98e-11	down
XM_018044527.1	gene-KIF21B	KIF21B	22.2809	1.83e-13	2.98e-11	up
Novel_010258	XLOC_113650	.	22.2798	1.84e-13	2.98e-11	up
XM_018048400.1	gene-C2CD5	C2CD5	-22.2848	1.85e-13	2.99e-11	down
XM_018046079.1	gene-POGZ	POGZ	22.2789	1.85e-13	2.99e-11	up
XM_018042330.1	gene-ERCC6	ERCC6	22.2731	1.88e-13	3.02e-11	up
Novel_009168	XLOC_101020	.	-22.2728	1.91e-13	3.05e-11	down
Novel_017698	XLOC_186749	.	22.2676	1.91e-13	3.05e-11	up
Novel_020194	XLOC_209823	.	22.2681	1.9e-13	3.05e-11	up
Novel_022625	XLOC_234404	.	-22.2752	1.9e-13	3.05e-11	down
Novel_017451	XLOC_182962	.	-22.2686	1.93e-13	3.08e-11	down
XM_018064688.1	gene-LOC102186431	LOC102186431	22.2585	1.95e-13	3.1e-11	up
Novel_021802	XLOC_223962	.	-22.2645	1.95e-13	3.1e-11	down
Novel_015071	XLOC_164420	.	-22.2564	1.99e-13	3.14e-11	down
Novel_017952	XLOC_189064	.	22.2505	1.99e-13	3.14e-11	up
Novel_008987	XLOC_099602	.	22.2483	2e-13	3.15e-11	up
Novel_007751	XLOC_083923	.	22.2392	2.03e-13	3.2e-11	up
Novel_021524	XLOC_220510	.	-22.2472	2.04e-13	3.2e-11	down
XM_013966824.2	gene-RIPK3	RIPK3	22.2348	2.07e-13	3.22e-11	up
Novel_008164	XLOC_089304	.	22.2344	2.07e-13	3.22e-11	up
Novel_010673	XLOC_117228	.	-22.2406	2.07e-13	3.22e-11	down
Novel_016883	XLOC_178578	.	22.236	2.06e-13	3.22e-11	up
XR_001919603.1	gene-LOC102174870	LOC102174870	22.2329	2.08e-13	3.23e-11	up
XM_018048695.1	gene-CACNA1C	CACNA1C	22.2255	2.12e-13	3.27e-11	up
Novel_017472	XLOC_183082	.	22.2241	2.11e-13	3.27e-11	up
XM_018052473.1	gene-PTCH1	PTCH1	22.2241	2.12e-13	3.28e-11	up
Novel_019417	XLOC_202796	.	22.2142	2.18e-13	3.36e-11	up
Novel_011597	XLOC_129010	.	-22.2163	2.2e-13	3.37e-11	down
Novel_016406	XLOC_175659	.	22.2092	2.2e-13	3.37e-11	up
Novel_017280	XLOC_181314	.	22.2096	2.2e-13	3.37e-11	up
Novel_018710	XLOC_197554	.	-22.2129	2.19e-13	3.37e-11	down
Novel_003358	XLOC_036888	.	-22.2078	2.25e-13	3.44e-11	down
XM_005678085.3	gene-BCAR3	BCAR3	-22.2003	2.29e-13	3.48e-11	down
Novel_018000	XLOC_189328	.	-22.2003	2.29e-13	3.48e-11	down
Novel_020020	XLOC_208028	.	-22.2003	2.29e-13	3.48e-11	down
XM_005680671.3	gene-CSF2RB	CSF2RB	-22.1981	2.3e-13	3.49e-11	down
Novel_010233	XLOC_113411	.	-22.1964	2.31e-13	3.49e-11	down
Novel_012060	XLOC_133321	.	-22.1981	2.3e-13	3.49e-11	down
Novel_012420	XLOC_137417	.	22.1909	2.31e-13	3.49e-11	up
XM_018054437.1	gene-PPP1R14D	PPP1R14D	-22.1916	2.34e-13	3.52e-11	down
Novel_011919	XLOC_131787	.	-22.189	2.36e-13	3.54e-11	down
Novel_006218	XLOC_065954	.	-22.1716	2.46e-13	3.66e-11	down
Novel_013871	XLOC_153488	.	22.166	2.45e-13	3.66e-11	up
Novel_013600	XLOC_150230	.	-22.169	2.48e-13	3.68e-11	down
Novel_006647	XLOC_070588	.	22.1591	2.49e-13	3.7e-11	up
XM_018055886.1	gene-ODF2	ODF2	-11.1629	2.52e-13	3.72e-11	down
Novel_017550	XLOC_184526	.	22.154	2.53e-13	3.73e-11	up
XM_018049217.1	gene-ALPK1	ALPK1	22.1491	2.56e-13	3.74e-11	up
XM_018039301.1	gene-IRF4	IRF4	-22.1572	2.55e-13	3.74e-11	down
XM_013965698.2	gene-MBNL1	MBNL1	22.1496	2.55e-13	3.74e-11	up
XM_018059634.1	gene-TNS1	TNS1	22.1497	2.55e-13	3.74e-11	up
Novel_022364	XLOC_231844	.	22.1496	2.55e-13	3.74e-11	up
Novel_008005	XLOC_087537	.	22.1427	2.6e-13	3.8e-11	up
Novel_006024	XLOC_063898	.	-22.147	2.61e-13	3.81e-11	down
XM_018060362.1	gene-KIF1B	KIF1B	-22.1453	2.63e-13	3.82e-11	down
XM_005683737.3	gene-TRPM3	TRPM3	-22.1453	2.63e-13	3.82e-11	down
XM_018063606.1	gene-BAHCC1	BAHCC1	22.1276	2.7e-13	3.9e-11	up
Novel_008881	XLOC_098220	.	-22.1343	2.7e-13	3.9e-11	down
Novel_009915	XLOC_109770	.	-22.1351	2.69e-13	3.9e-11	down
XM_018048678.1	gene-ERC1	ERC1	-22.1305	2.72e-13	3.92e-11	down
XM_018050119.1	gene-LOC108636345	LOC108636345	-22.1262	2.75e-13	3.95e-11	down
XM_018053964.1	gene-RPS6KL1	RPS6KL1	-22.1262	2.75e-13	3.95e-11	down
XM_013970103.2	gene-SDCCAG8	SDCCAG8	-22.1249	2.76e-13	3.96e-11	down
XM_018053213.1	gene-EPB41L2	EPB41L2	-22.1221	2.78e-13	3.98e-11	down
Novel_000591	XLOC_006146	.	22.1143	2.79e-13	3.98e-11	up
Novel_009934	XLOC_109930	.	22.112	2.8e-13	3.99e-11	up
Novel_004230	XLOC_047560	.	22.1054	2.83e-13	4.01e-11	up
Novel_018934	XLOC_198826	.	-22.113	2.85e-13	4.03e-11	down
Novel_017348	XLOC_181552	.	22.1019	2.87e-13	4.06e-11	up
XM_018046690.1	gene-PRKAG2	PRKAG2	-22.1063	2.89e-13	4.08e-11	down
Novel_005893	XLOC_062277	.	-22.1038	2.91e-13	4.08e-11	down
Novel_006240	XLOC_066009	.	-22.1043	2.91e-13	4.08e-11	down
Novel_011979	XLOC_132279	.	-22.1073	2.89e-13	4.08e-11	down
Novel_017131	XLOC_180119	.	-22.1043	2.91e-13	4.08e-11	down
Novel_019285	XLOC_201665	.	-22.1043	2.91e-13	4.08e-11	down
XM_018048693.1	gene-CACNA1C	CACNA1C	-22.0997	2.94e-13	4.11e-11	down
Novel_000420	XLOC_004688	.	-22.0928	2.97e-13	4.14e-11	down
Novel_012895	XLOC_143566	.	-22.0956	2.97e-13	4.14e-11	down
Novel_002032	XLOC_024263	.	22.0795	3.04e-13	4.22e-11	up
Novel_003597	XLOC_040657	.	-22.0863	3.04e-13	4.22e-11	down
XM_018059896.1	gene-MMP3	MMP3	-22.0808	3.08e-13	4.27e-11	down
Novel_016555	XLOC_176565	.	-22.0808	3.08e-13	4.27e-11	down
XM_013972621.2	gene-CXCR2	CXCR2	-22.0761	3.12e-13	4.31e-11	down
Novel_006661	XLOC_070610	.	22.068	3.12e-13	4.31e-11	up
Novel_011362	XLOC_125605	.	-22.0738	3.14e-13	4.32e-11	down
XM_018058152.1	gene-TAF2	TAF2	22.0545	3.22e-13	4.42e-11	up
Novel_012095	XLOC_133928	.	-22.0474	3.32e-13	4.55e-11	down
Novel_020110	XLOC_209179	.	-22.0488	3.34e-13	4.56e-11	down
XM_018044776.1	gene-PLXNB3	PLXNB3	-22.0448	3.37e-13	4.59e-11	down
XM_018050860.1	gene-SIRT6	SIRT6	-22.0415	3.4e-13	4.62e-11	down
Novel_014442	XLOC_158523	.	22.0254	3.47e-13	4.72e-11	up
XM_018048495.1	gene-LOC108636060	LOC108636060	-22.027	3.52e-13	4.78e-11	down
XR_309793.3	gene-NABP1	NABP1	-22.0256	3.53e-13	4.79e-11	down
Novel_009672	XLOC_106381	.	-22.0225	3.56e-13	4.82e-11	down
Novel_001750	XLOC_020400	.	22.0124	3.58e-13	4.84e-11	up
Novel_015316	XLOC_167572	.	-22.0144	3.63e-13	4.89e-11	down
Novel_018276	XLOC_192319	.	-22.0144	3.63e-13	4.89e-11	down
XM_018047133.1	gene-NT5C3A	NT5C3A	21.9999	3.7e-13	4.95e-11	up
XR_001297168.2	gene-GMEB1	GMEB1	-21.9957	3.77e-13	5.01e-11	down
XM_018056429.1	gene-MBNL2	MBNL2	-21.9995	3.77e-13	5.01e-11	down
XM_005683741.3	gene-TRPM3	TRPM3	-21.9998	3.77e-13	5.01e-11	down
XM_018062251.1	gene-ZNF536	ZNF536	-22.0012	3.75e-13	5.01e-11	down
Novel_005407	XLOC_057008	.	21.9897	3.79e-13	5.03e-11	up
Novel_016176	XLOC_174205	.	-21.9933	3.83e-13	5.06e-11	down
Novel_013145	XLOC_145766	.	21.9824	3.86e-13	5.09e-11	up
Novel_017540	XLOC_184475	.	21.9773	3.91e-13	5.15e-11	up
Novel_001119	XLOC_013474	.	-21.9835	3.92e-13	5.16e-11	down
Novel_002745	XLOC_030585	.	-21.9769	3.95e-13	5.19e-11	down
XM_018040360.1	gene-PDPK1	PDPK1	21.9715	3.96e-13	5.2e-11	up
XR_001917256.1	gene-IFT140	IFT140	-21.9772	3.99e-13	5.21e-11	down
XM_013968356.2	gene-MBNL2	MBNL2	-21.972	4.04e-13	5.26e-11	down
Novel_012796	XLOC_142615	.	-21.972	4.04e-13	5.26e-11	down
XM_005677138.3	gene-OLFML2B	OLFML2B	-21.9688	4.07e-13	5.27e-11	down
Novel_001178	XLOC_013859	.	-21.9671	4.05e-13	5.27e-11	down
Novel_001434	XLOC_017318	.	21.9616	4.06e-13	5.27e-11	up
Novel_021316	XLOC_218167	.	21.9616	4.06e-13	5.27e-11	up
Novel_017558	XLOC_184594	.	21.9549	4.13e-13	5.34e-11	up
Novel_005133	XLOC_054957	.	-21.952	4.24e-13	5.47e-11	down
Novel_013743	XLOC_151574	.	21.9443	4.24e-13	5.47e-11	up
Novel_019337	XLOC_202160	.	21.9434	4.24e-13	5.47e-11	up
XM_018065912.1	gene-SAP130	SAP130	-21.9483	4.28e-13	5.5e-11	down
Novel_010787	XLOC_119510	.	-21.9452	4.31e-13	5.53e-11	down
Novel_007717	XLOC_083782	.	-21.9396	4.37e-13	5.6e-11	down
Novel_015647	XLOC_170448	.	-21.9372	4.4e-13	5.62e-11	down
Novel_012599	XLOC_140012	.	-21.9359	4.41e-13	5.64e-11	down
Novel_019268	XLOC_201478	.	21.9263	4.43e-13	5.64e-11	up
Novel_022631	XLOC_234424	.	21.9269	4.42e-13	5.64e-11	up
Novel_012521	XLOC_138587	.	21.9238	4.46e-13	5.67e-11	up
XM_018057135.1	gene-LOC102176896	LOC102176896	21.9142	4.53e-13	5.75e-11	up
Novel_009544	XLOC_104830	.	21.9141	4.54e-13	5.75e-11	up
Novel_004849	XLOC_053070	.	21.9143	4.56e-13	5.77e-11	up
Novel_009552	XLOC_104845	.	-21.9223	4.56e-13	5.77e-11	down
Novel_011569	XLOC_128747	.	-21.9056	4.76e-13	6e-11	down
XM_018042894.1	gene-CDC42BPG	CDC42BPG	-21.9009	4.81e-13	6.05e-11	down
XM_018066730.1	gene-PTH1R	PTH1R	-21.898	4.85e-13	6.08e-11	down
Novel_008021	XLOC_087867	.	21.8892	4.85e-13	6.08e-11	up
Novel_002871	XLOC_031776	.	-21.8958	4.87e-13	6.1e-11	down
Novel_018469	XLOC_194658	.	21.8849	4.9e-13	6.13e-11	up
XM_013969812.2	gene-EMSY	EMSY	-21.8891	4.95e-13	6.17e-11	down
XM_018054955.1	gene-MAP4K4	MAP4K4	21.8787	4.98e-13	6.17e-11	up
XM_013977053.2	gene-TPM3	TPM3	-21.8866	4.98e-13	6.17e-11	down
Novel_010442	XLOC_115900	.	-21.8866	4.98e-13	6.17e-11	down
Novel_015464	XLOC_169539	.	21.8814	4.94e-13	6.17e-11	up
Novel_019892	XLOC_206720	.	-21.8824	4.99e-13	6.17e-11	down
XM_018059072.1	gene-SLC43A3	SLC43A3	21.8758	5.01e-13	6.19e-11	up
Novel_017825	XLOC_188067	.	21.872	5.06e-13	6.23e-11	up
XM_018057250.1	gene-RIN2	RIN2	-21.8791	5.08e-13	6.25e-11	down
Novel_012899	XLOC_143566	.	21.8643	5.13e-13	6.3e-11	up
XM_018038336.1	gene-CADPS	CADPS	21.8652	5.15e-13	6.31e-11	up
Novel_003017	XLOC_034029	.	-21.8734	5.15e-13	6.31e-11	down
Novel_011013	XLOC_121561	.	-21.8713	5.18e-13	6.33e-11	down
Novel_011821	XLOC_130860	.	-21.8541	5.29e-13	6.46e-11	down
Novel_012693	XLOC_140913	.	21.8525	5.31e-13	6.46e-11	up
Novel_017863	XLOC_188067	.	21.8525	5.31e-13	6.46e-11	up
XM_018044323.1	gene-VMA21	VMA21	21.8515	5.32e-13	6.47e-11	up
Novel_016666	XLOC_177181	.	21.842	5.39e-13	6.55e-11	up
XM_005682635.3	gene-RAPGEF6	RAPGEF6	21.8428	5.41e-13	6.56e-11	up
Novel_022726	XLOC_235282	.	21.8339	5.56e-13	6.72e-11	up
XM_005690405.3	gene-PM20D1	PM20D1	21.8259	5.67e-13	6.83e-11	up
XM_018055101.1	gene-TTC27	TTC27	-21.8343	5.67e-13	6.83e-11	down
XM_018058750.1	gene-KIFC2	KIFC2	-21.8244	5.81e-13	6.98e-11	down
Novel_013361	XLOC_148110	.	21.811	5.82e-13	6.98e-11	up
Novel_009161	XLOC_100982	.	21.813	5.85e-13	7e-11	up
Novel_016213	XLOC_174556	.	21.8092	5.9e-13	7.06e-11	up
Novel_008162	XLOC_089304	.	21.8004	6.03e-13	7.2e-11	up
Novel_013845	XLOC_153341	.	-21.7955	6.16e-13	7.32e-11	down
Novel_022300	XLOC_231284	.	-21.7955	6.16e-13	7.32e-11	down
XM_018060117.1	gene-MAP2	MAP2	21.7878	6.22e-13	7.39e-11	up
XM_018038560.1	gene-COL11A2	COL11A2	-21.7909	6.3e-13	7.45e-11	down
Novel_007823	XLOC_085060	.	-21.7909	6.3e-13	7.45e-11	down
Novel_000373	XLOC_004337	.	-21.7873	6.36e-13	7.48e-11	down
XM_005695434.3	gene-BAG5	BAG5	-21.7801	6.47e-13	7.59e-11	down
XM_018059639.1	gene-TNS1	TNS1	21.7691	6.47e-13	7.59e-11	up
Novel_004229	XLOC_047560	.	-21.7699	6.64e-13	7.77e-11	down
Novel_007287	XLOC_078209	.	-21.7699	6.64e-13	7.77e-11	down
Novel_003022	XLOC_034144	.	-21.7657	6.71e-13	7.83e-11	down
Novel_022871	XLOC_236706	.	-21.7657	6.71e-13	7.83e-11	down
Novel_011862	XLOC_131260	.	-21.7641	6.74e-13	7.84e-11	down
Novel_016876	XLOC_178468	.	-21.7641	6.74e-13	7.84e-11	down
Novel_021117	XLOC_216404	.	21.753	6.77e-13	7.87e-11	up
XM_005677771.3	gene-PDE4DIP	PDE4DIP	21.7475	6.86e-13	7.95e-11	up
Novel_013365	XLOC_148110	.	21.7475	6.86e-13	7.95e-11	up
XR_001918836.1	gene-DNMT3A	DNMT3A	21.745	6.9e-13	7.98e-11	up
Novel_006422	XLOC_068584	.	-21.7531	6.92e-13	7.98e-11	down
Novel_018555	XLOC_195871	.	-21.7531	6.92e-13	7.98e-11	down
Novel_001067	XLOC_013155	.	21.7403	6.94e-13	7.99e-11	up
Novel_007204	XLOC_077830	.	21.7403	6.94e-13	7.99e-11	up
Novel_010194	XLOC_112730	.	-21.7488	7e-13	8.02e-11	down
Novel_003375	XLOC_037170	.	21.738	7.02e-13	8.04e-11	up
Novel_004208	XLOC_047560	.	21.7378	7.03e-13	8.04e-11	up
Novel_012232	XLOC_135494	.	-21.7425	7.1e-13	8.09e-11	down
Novel_014604	XLOC_159778	.	21.7341	7.09e-13	8.09e-11	up
Novel_001356	XLOC_015981	.	-21.7386	7.16e-13	8.13e-11	down
Novel_001580	XLOC_019107	.	21.7302	7.16e-13	8.13e-11	up
Novel_002917	XLOC_032902	.	-21.7386	7.16e-13	8.13e-11	down
XM_005697317.2	gene-SERPINB7	SERPINB7	-21.7337	7.26e-13	8.21e-11	down
Novel_000232	XLOC_002731	.	21.7246	7.26e-13	8.21e-11	up
Novel_000953	XLOC_012139	.	-21.7333	7.26e-13	8.21e-11	down
XM_005689359.3	gene-MMP13	MMP13	-21.7238	7.44e-13	8.36e-11	down
Novel_010766	XLOC_119104	.	-21.7238	7.44e-13	8.36e-11	down
XM_013967464.2	gene-IL1RL2	IL1RL2	21.7114	7.49e-13	8.37e-11	up
Novel_004451	XLOC_049355	.	-21.722	7.47e-13	8.37e-11	down
Novel_003135	XLOC_035159	.	21.7088	7.54e-13	8.41e-11	up
Novel_007721	XLOC_083793	.	-21.7123	7.65e-13	8.51e-11	down
Novel_011081	XLOC_121921	.	-21.7127	7.64e-13	8.51e-11	down
Novel_011673	XLOC_129926	.	-21.7099	7.7e-13	8.55e-11	down
XM_018042853.1	gene-EHBP1L1	EHBP1L1	-21.6967	7.95e-13	8.79e-11	down
XM_018055143.1	gene-EIF4G3	EIF4G3	-21.6965	7.95e-13	8.79e-11	down
Novel_015317	XLOC_167596	.	-21.6967	7.95e-13	8.79e-11	down
Novel_016131	XLOC_174126	.	-21.6967	7.95e-13	8.79e-11	down
XR_001919223.1	gene-LOC102173955	LOC102173955	21.6829	8.03e-13	8.86e-11	up
Novel_003843	XLOC_042879	.	-21.6875	8.13e-13	8.95e-11	down
XM_018054949.1	gene-MAP4K4	MAP4K4	21.6765	8.16e-13	8.97e-11	up
Novel_006354	XLOC_067763	.	21.6765	8.16e-13	8.97e-11	up
Novel_021130	XLOC_216517	.	-21.6825	8.22e-13	9.03e-11	down
Novel_018511	XLOC_194919	.	21.6723	8.24e-13	9.04e-11	up
Novel_004875	XLOC_053070	.	21.6633	8.42e-13	9.21e-11	up
Novel_019370	XLOC_202601	.	-21.6705	8.48e-13	9.25e-11	down
Novel_008733	XLOC_095789	.	-21.669	8.51e-13	9.27e-11	down
Novel_022632	XLOC_234424	.	21.657	8.55e-13	9.31e-11	up
Novel_008188	XLOC_089541	.	21.6544	8.61e-13	9.35e-11	up
XM_018054943.1	gene-MAP4K4	MAP4K4	21.6537	8.62e-13	9.36e-11	up
NM_001285580.1	gene-LOC100860959	LOC100860959	-21.6599	8.7e-13	9.43e-11	down
XM_005677182.3	gene-NECTIN4	NECTIN4	-21.6584	8.73e-13	9.45e-11	down
XM_013962486.2	gene-PDE4DIP	PDE4DIP	21.6469	8.77e-13	9.48e-11	up
Novel_009987	XLOC_110406	.	-21.6546	8.81e-13	9.51e-11	down
Novel_011589	XLOC_128924	.	-21.6546	8.81e-13	9.51e-11	down
Novel_004300	XLOC_048114	.	-21.6521	8.87e-13	9.55e-11	down
Novel_021051	XLOC_216105	.	21.6405	8.9e-13	9.58e-11	up
Novel_006973	XLOC_075293	.	-21.6474	8.97e-13	9.63e-11	down
Novel_004578	XLOC_050358	.	-21.6431	9.06e-13	9.69e-11	down
Novel_013851	XLOC_153358	.	-21.6431	9.06e-13	9.69e-11	down
Novel_000629	XLOC_006958	.	-21.636	9.22e-13	9.84e-11	down
Novel_007147	XLOC_076957	.	-21.6347	9.25e-13	9.84e-11	down
Novel_021801	XLOC_223962	.	-21.6347	9.25e-13	9.84e-11	down
Novel_011876	XLOC_131468	.	-21.6274	9.42e-13	1e-10	down
XM_013965356.2	gene-GRAMD3	GRAMD3	-21.6153	9.7e-13	1.03e-10	down
Novel_001856	XLOC_021608	.	-21.6141	9.73e-13	1.03e-10	down
Novel_001958	XLOC_023554	.	-21.6034	9.84e-13	1.04e-10	down
Novel_004083	XLOC_046831	.	-21.6034	9.84e-13	1.04e-10	down
Novel_022330	XLOC_231484	.	-21.6097	9.84e-13	1.04e-10	down
Novel_009013	XLOC_099828	.	-21.6043	9.97e-13	1.05e-10	down
Novel_017482	XLOC_183082	.	21.5893	1.01e-12	1.06e-10	up
XM_018050639.1	gene-CDHR2	CDHR2	-21.5888	1.03e-12	1.08e-10	down
XM_018050802.1	gene-GNA15	GNA15	-21.5896	1.03e-12	1.08e-10	down
XM_005680351.3	gene-PAN2	PAN2	-21.5896	1.03e-12	1.08e-10	down
XR_001919364.1	gene-SGSM1	SGSM1	-21.5888	1.03e-12	1.08e-10	down
Novel_000439	XLOC_004795	.	-21.5911	1.03e-12	1.08e-10	down
XM_013969201.2	gene-TMEM68	TMEM68	-21.5829	1.05e-12	1.09e-10	down
Novel_004988	XLOC_053492	.	-21.5844	1.05e-12	1.09e-10	down
Novel_007007	XLOC_075556	.	21.5715	1.05e-12	1.09e-10	up
Novel_021099	XLOC_216306	.	-21.5859	1.04e-12	1.09e-10	down
Novel_009942	XLOC_109949	.	21.5592	1.08e-12	1.12e-10	up
Novel_019409	XLOC_202796	.	-21.573	1.08e-12	1.12e-10	down
Novel_002403	XLOC_028056	.	-21.5669	1.09e-12	1.13e-10	down
Novel_005028	XLOC_054057	.	-21.5681	1.09e-12	1.13e-10	down
Novel_006991	XLOC_075440	.	-21.5638	1.1e-12	1.13e-10	down
Novel_012868	XLOC_143231	.	-21.5669	1.09e-12	1.13e-10	down
Novel_015990	XLOC_173393	.	21.5536	1.1e-12	1.13e-10	up
Novel_016647	XLOC_177089	.	-21.5681	1.09e-12	1.13e-10	down
Novel_019467	XLOC_202982	.	21.5493	1.11e-12	1.14e-10	up
Novel_022482	XLOC_234071	.	-21.553	1.13e-12	1.16e-10	down
XM_018040046.1	gene-MAPK8IP3	MAPK8IP3	21.535	1.15e-12	1.17e-10	up
XM_018050859.1	gene-SIRT6	SIRT6	21.5361	1.15e-12	1.17e-10	up
Novel_004860	XLOC_053070	.	21.537	1.14e-12	1.17e-10	up
Novel_007890	XLOC_085333	.	21.5384	1.14e-12	1.17e-10	up
Novel_011109	XLOC_122253	.	-21.5462	1.15e-12	1.17e-10	down
Novel_018404	XLOC_194153	.	-21.5462	1.15e-12	1.17e-10	down
XM_005685771.3	gene-SCG3	SCG3	-21.5427	1.16e-12	1.18e-10	down
Novel_010584	XLOC_116444	.	21.5307	1.16e-12	1.18e-10	up
XM_013976534.2	gene-KDM5C	KDM5C	-10.7819	1.18e-12	1.19e-10	down
XM_018048084.1	gene-SLC39A5	SLC39A5	21.5268	1.17e-12	1.19e-10	up
Novel_006699	XLOC_070746	.	-21.5362	1.18e-12	1.19e-10	down
Novel_008878	XLOC_098201	.	-21.5326	1.19e-12	1.2e-10	down
Novel_011022	XLOC_121586	.	-21.5326	1.19e-12	1.2e-10	down
XM_018057015.1	gene-LOC102175492	LOC102175492	21.5123	1.2e-12	1.21e-10	up
Novel_003487	XLOC_038986	.	21.5183	1.2e-12	1.21e-10	up
Novel_023972	XLOC_251031	.	21.5116	1.22e-12	1.22e-10	up
Novel_021442	XLOC_219389	.	-21.51	1.22e-12	1.23e-10	down
Novel_001014	XLOC_012462	.	21.5047	1.24e-12	1.24e-10	up
Novel_003265	XLOC_036292	.	-21.5174	1.23e-12	1.24e-10	down
XM_013971431.2	gene-MAP2	MAP2	21.5012	1.25e-12	1.25e-10	up
Novel_020372	XLOC_211063	.	-21.513	1.24e-12	1.25e-10	down
XM_013965683.2	gene-ABLIM3	ABLIM3	21.4979	1.26e-12	1.26e-10	up
XM_018062880.1	gene-NEB	NEB	21.4979	1.26e-12	1.26e-10	up
XM_018063622.1	gene-AATK	AATK	21.4906	1.28e-12	1.27e-10	up
NM_001290107.1	gene-ACE2	ACE2	-21.5006	1.28e-12	1.27e-10	down
XR_001919757.1	gene-BRCA1	BRCA1	-21.504	1.27e-12	1.27e-10	down
XM_018040739.1	gene-ELN	ELN	-21.4989	1.29e-12	1.27e-10	down
XM_018051367.1	gene-MYO9B	MYO9B	-21.4914	1.29e-12	1.27e-10	down
Novel_004876	XLOC_053070	.	21.4892	1.28e-12	1.27e-10	up
Novel_007840	XLOC_085083	.	-21.5005	1.28e-12	1.27e-10	down
Novel_015348	XLOC_167994	.	-21.5006	1.28e-12	1.27e-10	down
Novel_021348	XLOC_218369	.	-21.5005	1.28e-12	1.27e-10	down
Novel_022243	XLOC_230400	.	21.4911	1.28e-12	1.27e-10	up
Novel_022273	XLOC_231085	.	21.4911	1.28e-12	1.27e-10	up
Novel_005248	XLOC_056191	.	21.4782	1.32e-12	1.29e-10	up
Novel_011093	XLOC_122028	.	21.4792	1.32e-12	1.29e-10	up
Novel_013139	XLOC_145766	.	21.4792	1.32e-12	1.29e-10	up
Novel_023475	XLOC_246411	.	21.4824	1.31e-12	1.29e-10	up
XM_018041567.1	gene-COL8A2	COL8A2	21.4751	1.33e-12	1.3e-10	up
Novel_020851	XLOC_214669	.	-21.4856	1.33e-12	1.3e-10	down
Novel_019398	XLOC_202796	.	21.4721	1.34e-12	1.31e-10	up
XM_005687862.3	gene-MASTL	MASTL	-21.4711	1.38e-12	1.34e-10	down
XM_005680352.3	gene-PAN2	PAN2	-21.4711	1.38e-12	1.34e-10	down
XM_018048461.1	gene-SHOX2	SHOX2	-21.4711	1.38e-12	1.34e-10	down
Novel_015574	XLOC_170024	.	-21.4727	1.37e-12	1.34e-10	down
Novel_017817	XLOC_188067	.	-21.4711	1.38e-12	1.34e-10	down
Novel_000040	XLOC_000752	.	-21.4618	1.41e-12	1.36e-10	down
Novel_020442	XLOC_211994	.	21.4512	1.41e-12	1.36e-10	up
XM_018055453.1	gene-AAK1	AAK1	-21.4556	1.43e-12	1.38e-10	down
XM_018058749.1	gene-KIFC2	KIFC2	-21.4573	1.43e-12	1.38e-10	down
XM_018047071.1	gene-MPP6	MPP6	21.4358	1.44e-12	1.38e-10	up
Novel_004822	XLOC_052933	.	-21.4546	1.44e-12	1.38e-10	down
Novel_007726	XLOC_083793	.	-21.4533	1.44e-12	1.38e-10	down
Novel_008937	XLOC_099120	.	21.4443	1.43e-12	1.38e-10	up
XM_018056059.1	gene-GBGT1	GBGT1	21.435	1.46e-12	1.4e-10	up
XR_001917414.1	gene-TARBP1	TARBP1	21.4238	1.5e-12	1.43e-10	up
Novel_002723	XLOC_030467	.	-21.4363	1.5e-12	1.43e-10	down
Novel_016578	XLOC_176710	.	21.4148	1.54e-12	1.46e-10	up
XM_018066324.1	gene-NOVA1	NOVA1	-21.4171	1.57e-12	1.49e-10	down
Novel_002814	XLOC_030943	.	-21.4171	1.57e-12	1.49e-10	down
Novel_013651	XLOC_150826	.	-21.4143	1.58e-12	1.5e-10	down
Novel_010127	XLOC_111769	.	21.4002	1.59e-12	1.51e-10	up
Novel_013960	XLOC_154309	.	21.4002	1.59e-12	1.51e-10	up
XM_018052359.1	gene-ADRA1A	ADRA1A	-21.4071	1.61e-12	1.52e-10	down
XM_018052529.1	gene-CDK20	CDK20	-21.4079	1.61e-12	1.52e-10	down
Novel_009715	XLOC_106767	.	-21.4079	1.61e-12	1.52e-10	down
Novel_021029	XLOC_215948	.	-21.4071	1.61e-12	1.52e-10	down
Novel_022402	XLOC_232273	.	-21.4071	1.61e-12	1.52e-10	down
NM_001287570.1	gene-LOC102191547	LOC102191547	-21.3976	1.64e-12	1.53e-10	down
XM_018047210.1	gene-NRCAM	NRCAM	-21.4002	1.64e-12	1.53e-10	down
XM_018043168.1	gene-UEVLD	UEVLD	21.3866	1.64e-12	1.53e-10	up
Novel_001710	XLOC_019961	.	-21.4002	1.64e-12	1.53e-10	down
Novel_003288	XLOC_036554	.	-21.3976	1.64e-12	1.53e-10	down
Novel_006876	XLOC_071519	.	21.3918	1.62e-12	1.53e-10	up
Novel_012403	XLOC_137281	.	-21.3982	1.65e-12	1.53e-10	down
Novel_013475	XLOC_148803	.	21.3904	1.63e-12	1.53e-10	up
Novel_023702	XLOC_248811	.	-21.3976	1.64e-12	1.53e-10	down
XM_005693503.2	gene-CHRNB1	CHRNB1	21.3786	1.68e-12	1.56e-10	up
XM_018040927.1	gene-RBFOX1	RBFOX1	-21.3891	1.68e-12	1.56e-10	down
Novel_007588	XLOC_082412	.	-21.3891	1.68e-12	1.56e-10	down
Novel_018434	XLOC_194522	.	-21.3888	1.68e-12	1.56e-10	down
Novel_020176	XLOC_209669	.	21.3786	1.68e-12	1.56e-10	up
XM_018039004.1	gene-GLTSCR1L	GLTSCR1L	-21.3851	1.7e-12	1.57e-10	down
XM_018052520.1	gene-SECISBP2	SECISBP2	-21.3851	1.7e-12	1.57e-10	down
XM_018060073.1	gene-SRGAP2	SRGAP2	21.372	1.7e-12	1.57e-10	up
XM_018040996.1	gene-MLXIPL	MLXIPL	21.367	1.72e-12	1.58e-10	up
Novel_012251	XLOC_135570	.	21.367	1.72e-12	1.58e-10	up
XM_005678444.3	gene-ELAVL4	ELAVL4	-21.364	1.79e-12	1.64e-10	down
XM_018054196.1	gene-GLDN	GLDN	-21.364	1.79e-12	1.64e-10	down
Novel_015031	XLOC_164233	.	21.3507	1.79e-12	1.64e-10	up
Novel_023839	XLOC_250117	.	21.3375	1.85e-12	1.69e-10	up
Novel_015543	XLOC_169884	.	-21.346	1.87e-12	1.7e-10	down
Novel_020012	XLOC_207919	.	-21.346	1.87e-12	1.7e-10	down
XM_018053255.1	gene-IL20RA	IL20RA	-21.3409	1.89e-12	1.72e-10	down
Novel_000438	XLOC_004795	.	-21.3417	1.89e-12	1.72e-10	down
Novel_004858	XLOC_053070	.	21.3284	1.89e-12	1.72e-10	up
Novel_015425	XLOC_169337	.	-21.3366	1.91e-12	1.73e-10	down
Novel_021132	XLOC_216517	.	-21.3366	1.91e-12	1.73e-10	down
Novel_001228	XLOC_014233	.	21.319	1.93e-12	1.74e-10	up
XM_018040015.1	gene-FBXL19	FBXL19	21.3184	1.94e-12	1.75e-10	up
XM_005680611.3	gene-RBFOX2	RBFOX2	-21.3193	1.99e-12	1.79e-10	down
XM_018053839.1	gene-TTC7B	TTC7B	21.3077	1.99e-12	1.79e-10	up
Novel_004714	XLOC_050992	.	-21.3193	1.99e-12	1.79e-10	down
XM_018043127.1	gene-LOC102180829	LOC102180829	-21.3162	2.01e-12	1.8e-10	down
XM_018052105.1	gene-PHF24	PHF24	-21.3162	2.01e-12	1.8e-10	down
XM_013973198.2	gene-SERPINA14	SERPINA14	-21.3162	2.01e-12	1.8e-10	down
Novel_017926	XLOC_188885	.	21.3042	2e-12	1.8e-10	up
Novel_024352	XLOC_255907	.	21.3031	2.01e-12	1.8e-10	up
Novel_005350	XLOC_056786	.	-21.3113	2.03e-12	1.81e-10	down
Novel_014437	XLOC_158509	.	21.3013	2.02e-12	1.81e-10	up
XM_018056666.1	gene-SUPT20H	SUPT20H	-21.308	2.05e-12	1.82e-10	down
XM_018055495.1	gene-ZNF512	ZNF512	21.2973	2.04e-12	1.82e-10	up
Novel_006426	XLOC_068623	.	-21.308	2.05e-12	1.82e-10	down
XM_018064505.1	gene-ALOX12	ALOX12	-21.3064	2.05e-12	1.83e-10	down
XM_018052550.1	gene-FSD1L	FSD1L	21.2929	2.06e-12	1.83e-10	up
Novel_021429	XLOC_219273	.	21.2926	2.06e-12	1.83e-10	up
XM_013971381.1	gene-BSPH1	BSPH1	-21.2873	2.13e-12	1.87e-10	down
Novel_001505	XLOC_018767	.	-21.2873	2.13e-12	1.87e-10	down
Novel_013369	XLOC_148110	.	21.2818	2.11e-12	1.87e-10	up
Novel_017755	XLOC_187486	.	21.2822	2.11e-12	1.87e-10	up
XM_018046036.1	gene-ADAMTSL4	ADAMTSL4	-21.2845	2.17e-12	1.91e-10	down
Novel_014231	XLOC_156513	.	21.269	2.18e-12	1.92e-10	up
Novel_011687	XLOC_130050	.	21.2612	2.22e-12	1.94e-10	up
XR_001918215.1	gene-EVC	EVC	-21.2707	2.24e-12	1.95e-10	down
XM_018049678.1	gene-HELQ	HELQ	-21.2723	2.23e-12	1.95e-10	down
XM_018049656.1	gene-SEC31A	SEC31A	21.2578	2.24e-12	1.95e-10	up
Novel_000321	XLOC_003936	.	21.2578	2.24e-12	1.95e-10	up
Novel_019556	XLOC_203757	.	-21.2723	2.23e-12	1.95e-10	down
Novel_006435	XLOC_068623	.	-21.2648	2.27e-12	1.97e-10	down
Novel_011433	XLOC_126587	.	-21.2582	2.27e-12	1.97e-10	down
Novel_019257	XLOC_201134	.	-21.2648	2.27e-12	1.97e-10	down
XM_018061723.1	gene-LOC106503077	LOC106503077	-21.2628	2.28e-12	1.98e-10	down
XM_018042899.1	gene-CDC42BPG	CDC42BPG	-21.2529	2.34e-12	2.02e-10	down
Novel_021063	XLOC_216149	.	21.2362	2.36e-12	2.03e-10	up
XM_018065957.1	gene-ADAL	ADAL	-21.2441	2.39e-12	2.05e-10	down
XM_018041981.1	gene-ANK1	ANK1	-21.2449	2.38e-12	2.05e-10	down
XM_018050705.1	gene-SLC12A2	SLC12A2	-21.2449	2.38e-12	2.05e-10	down
XM_018058608.1	gene-TRAPPC9	TRAPPC9	-21.2449	2.38e-12	2.05e-10	down
Novel_024023	XLOC_251491	.	-21.2441	2.39e-12	2.05e-10	down
XM_018054100.1	gene-EXOC5	EXOC5	21.2242	2.43e-12	2.08e-10	up
XM_018047967.1	gene-CPM	CPM	-21.2279	2.48e-12	2.11e-10	down
XM_013962440.2	gene-ECM1	ECM1	-21.2281	2.48e-12	2.11e-10	down
Novel_009033	XLOC_099894	.	21.2141	2.49e-12	2.11e-10	up
Novel_010887	XLOC_120967	.	-21.2279	2.48e-12	2.11e-10	down
Novel_014250	XLOC_156744	.	-21.2295	2.47e-12	2.11e-10	down
Novel_000519	XLOC_005444	.	21.2051	2.54e-12	2.16e-10	up
Novel_021867	XLOC_224647	.	21.2055	2.54e-12	2.16e-10	up
XR_001918229.1	gene-GRK4	GRK4	21.1988	2.58e-12	2.19e-10	up
XM_018041168.1	gene-GJB4	GJB4	-21.205	2.62e-12	2.22e-10	down
Novel_008936	XLOC_099120	.	21.1893	2.62e-12	2.22e-10	up
XM_018041463.1	gene-CPEB3	CPEB3	21.1834	2.68e-12	2.26e-10	up
XM_005692255.2	gene-LOC102190903	LOC102190903	-21.197	2.68e-12	2.26e-10	down
Novel_009955	XLOC_110110	.	21.1792	2.7e-12	2.28e-10	up
Novel_017102	XLOC_179919	.	-21.1923	2.71e-12	2.28e-10	down
Novel_008948	XLOC_099231	.	21.1744	2.73e-12	2.3e-10	up
XM_018059010.1	gene-NCAPD3	NCAPD3	21.1656	2.79e-12	2.35e-10	up
XM_018056664.1	gene-SUPT20H	SUPT20H	-21.1682	2.87e-12	2.41e-10	down
Novel_011595	XLOC_129010	.	-21.1682	2.87e-12	2.41e-10	down
XR_001919295.1	gene-PER3	PER3	21.1511	2.89e-12	2.42e-10	up
Novel_003250	XLOC_036268	.	21.1511	2.89e-12	2.42e-10	up
Novel_000856	XLOC_011287	.	21.1438	2.94e-12	2.46e-10	up
Novel_013380	XLOC_148110	.	21.1441	2.94e-12	2.46e-10	up
XM_018043323.1	gene-FLI1	FLI1	21.1409	2.96e-12	2.47e-10	up
Novel_004024	XLOC_045599	.	21.1409	2.96e-12	2.47e-10	up
XM_005695650.3	gene-GRM7	GRM7	-21.1395	3.07e-12	2.56e-10	down
Novel_002697	XLOC_030355	.	-21.1395	3.07e-12	2.56e-10	down
Novel_010282	XLOC_114021	.	21.1255	3.07e-12	2.56e-10	up
Novel_000340	XLOC_004096	.	21.1208	3.11e-12	2.58e-10	up
Novel_010980	XLOC_121416	.	21.1169	3.14e-12	2.6e-10	up
Novel_012470	XLOC_137918	.	21.1176	3.13e-12	2.6e-10	up
Novel_019394	XLOC_202796	.	21.1131	3.16e-12	2.62e-10	up
Novel_014024	XLOC_154594	.	21.109	3.18e-12	2.63e-10	up
Novel_005843	XLOC_061800	.	21.0994	3.27e-12	2.7e-10	up
Novel_006452	XLOC_068856	.	21.0889	3.35e-12	2.76e-10	up
Novel_017116	XLOC_180012	.	21.0889	3.35e-12	2.76e-10	up
XM_018038270.1	gene-SACM1L	SACM1L	21.088	3.36e-12	2.77e-10	up
Novel_015769	XLOC_171652	.	21.0842	3.39e-12	2.79e-10	up
Novel_010945	XLOC_121352	.	21.0828	3.4e-12	2.8e-10	up
XM_018038703.1	gene-ANKS1A	ANKS1A	21.0581	3.61e-12	2.96e-10	up
Novel_013921	XLOC_154177	.	21.0478	3.7e-12	3.03e-10	up
XM_018061348.1	gene-MPHOSPH9	MPHOSPH9	21.0457	3.71e-12	3.04e-10	up
Novel_007043	XLOC_075914	.	21.037	3.79e-12	3.1e-10	up
Novel_000994	XLOC_012406	.	21.0338	3.82e-12	3.12e-10	up
XM_018063068.1	gene-SHISA7	SHISA7	21.0259	3.88e-12	3.16e-10	up
Novel_004529	XLOC_049793	.	21.0249	3.9e-12	3.18e-10	up
Novel_000109	XLOC_001898	.	21.0185	3.96e-12	3.23e-10	up
XM_018042851.1	gene-EHBP1L1	EHBP1L1	21.0076	4.07e-12	3.3e-10	up
Novel_006450	XLOC_068724	.	21.0068	4.07e-12	3.3e-10	up
Novel_014507	XLOC_159087	.	21.0068	4.07e-12	3.3e-10	up
Novel_014879	XLOC_163092	.	21.0076	4.07e-12	3.3e-10	up
Novel_017377	XLOC_182046	.	21.0028	4.11e-12	3.33e-10	up
Novel_022263	XLOC_230666	.	20.9945	4.18e-12	3.38e-10	up
Novel_013372	XLOC_148110	.	20.9874	4.26e-12	3.44e-10	up
Novel_006688	XLOC_070703	.	20.9742	4.4e-12	3.55e-10	up
Novel_010257	XLOC_113650	.	20.9716	4.41e-12	3.56e-10	up
XM_018059008.1	gene-NCAPD3	NCAPD3	20.9688	4.46e-12	3.59e-10	up
Novel_018884	XLOC_198536	.	20.9688	4.46e-12	3.59e-10	up
XM_018044205.1	gene-ATP11C	ATP11C	20.9618	4.53e-12	3.64e-10	up
XM_013967104.2	gene-ICE2	ICE2	20.9601	4.55e-12	3.64e-10	up
XM_018061522.1	gene-LARP1B	LARP1B	20.9603	4.55e-12	3.64e-10	up
Novel_014926	XLOC_163464	.	20.9601	4.55e-12	3.64e-10	up
Novel_017800	XLOC_188067	.	20.9601	4.55e-12	3.64e-10	up
Novel_022195	XLOC_229777	.	20.9601	4.55e-12	3.64e-10	up
Novel_014570	XLOC_159526	.	20.9558	4.6e-12	3.67e-10	up
XM_018040660.1	gene-CASKIN1	CASKIN1	20.9543	4.61e-12	3.68e-10	up
XM_018046945.1	gene-IRF5	IRF5	20.949	4.67e-12	3.71e-10	up
XM_018045993.1	gene-PDE4DIP	PDE4DIP	20.949	4.67e-12	3.71e-10	up
Novel_006600	XLOC_070441	.	20.9481	4.66e-12	3.71e-10	up
Novel_012502	XLOC_138433	.	20.9481	4.66e-12	3.71e-10	up
Novel_008354	XLOC_090662	.	20.943	4.73e-12	3.76e-10	up
Novel_020913	XLOC_215223	.	-20.9289	4.78e-12	3.8e-10	down
XM_018040997.1	gene-MLXIPL	MLXIPL	20.9222	4.98e-12	3.93e-10	up
Novel_000215	XLOC_002719	.	20.9234	4.96e-12	3.93e-10	up
Novel_008921	XLOC_098866	.	20.923	4.97e-12	3.93e-10	up
Novel_018025	XLOC_189532	.	20.923	4.97e-12	3.93e-10	up
Novel_000858	XLOC_011337	.	20.915	5.06e-12	3.99e-10	up
XM_018065289.1	gene-MAPT	MAPT	20.9118	5.1e-12	4.02e-10	up
Novel_012914	XLOC_143790	.	20.9052	5.18e-12	4.08e-10	up
Novel_002272	XLOC_026061	.	20.8957	5.3e-12	4.17e-10	up
Novel_015148	XLOC_165611	.	20.8797	5.39e-12	4.24e-10	up
Novel_002790	XLOC_030807	.	20.8842	5.44e-12	4.27e-10	up
Novel_020240	XLOC_210238	.	20.8842	5.44e-12	4.27e-10	up
XM_018042857.1	gene-EHBP1L1	EHBP1L1	-20.8775	5.6e-12	4.38e-10	down
Novel_010639	XLOC_116896	.	20.8705	5.62e-12	4.39e-10	up
XM_005677776.3	gene-PDE4DIP	PDE4DIP	20.8517	5.88e-12	4.59e-10	up
XM_005679745.3	gene-NAV3	NAV3	20.8438	5.99e-12	4.67e-10	up
Novel_006171	XLOC_065679	.	20.8392	6.05e-12	4.72e-10	up
Novel_008332	XLOC_090337	.	20.8165	6.39e-12	4.97e-10	up
Novel_001551	XLOC_018971	.	20.8117	6.46e-12	5.01e-10	up
Novel_004102	XLOC_047163	.	20.8117	6.46e-12	5.01e-10	up
Novel_010188	XLOC_112725	.	20.8006	6.63e-12	5.13e-10	up
Novel_013949	XLOC_154309	.	20.8016	6.61e-12	5.13e-10	up
XM_018059254.1	gene-EHF	EHF	20.7958	6.7e-12	5.18e-10	up
Novel_002758	XLOC_030652	.	20.7958	6.7e-12	5.18e-10	up
XM_013969945.2	gene-R3HDM1	R3HDM1	20.7843	6.89e-12	5.31e-10	up
Novel_005832	XLOC_061733	.	20.7843	6.89e-12	5.31e-10	up
Novel_019730	XLOC_205513	.	20.7701	6.88e-12	5.31e-10	up
Novel_018682	XLOC_197386	.	20.7803	6.95e-12	5.36e-10	up
Novel_012759	XLOC_141702	.	20.7732	7.07e-12	5.44e-10	up
Novel_001450	XLOC_017440	.	20.7706	7.11e-12	5.47e-10	up
XM_018045994.1	gene-PDE4DIP	PDE4DIP	20.7647	7.21e-12	5.53e-10	up
Novel_006242	XLOC_066009	.	20.7647	7.21e-12	5.53e-10	up
Novel_010065	XLOC_111222	.	20.7647	7.21e-12	5.53e-10	up
Novel_011318	XLOC_125155	.	20.7607	7.28e-12	5.57e-10	up
Novel_023322	XLOC_243531	.	20.7607	7.28e-12	5.57e-10	up
XM_018047884.1	gene-ENDOU	ENDOU	20.7558	7.36e-12	5.63e-10	up
XM_018066751.1	gene-ARIH2	ARIH2	20.7458	7.54e-12	5.76e-10	up
Novel_008553	XLOC_093553	.	20.7329	7.77e-12	5.93e-10	up
Novel_003226	XLOC_035942	.	20.7304	7.82e-12	5.95e-10	up
XM_005680320.3	gene-LOC102183851	LOC102183851	20.7256	7.91e-12	6.01e-10	up
Novel_000041	XLOC_000752	.	20.7179	8.05e-12	6.11e-10	up
Novel_003886	XLOC_043263	.	20.7138	8.12e-12	6.14e-10	up
Novel_011189	XLOC_123530	.	20.7138	8.12e-12	6.14e-10	up
Novel_017632	XLOC_185565	.	20.7142	8.12e-12	6.14e-10	up
Novel_021300	XLOC_218119	.	20.7142	8.12e-12	6.14e-10	up
Novel_023100	XLOC_240107	.	20.7138	8.12e-12	6.14e-10	up
Novel_004571	XLOC_050256	.	20.7124	8.15e-12	6.15e-10	up
Novel_018043	XLOC_189751	.	20.7124	8.15e-12	6.15e-10	up
Novel_000551	XLOC_005566	.	20.7077	8.23e-12	6.2e-10	up
Novel_021264	XLOC_217649	.	20.7077	8.23e-12	6.2e-10	up
XM_018057454.1	gene-SIRPA	SIRPA	20.707	8.26e-12	6.21e-10	up
Novel_023778	XLOC_249551	.	20.707	8.26e-12	6.21e-10	up
Novel_021822	XLOC_224103	.	20.6899	8.6e-12	6.46e-10	up
XM_018042408.1	gene-KCNMA1	KCNMA1	20.6839	8.72e-12	6.54e-10	up
Novel_007145	XLOC_076934	.	20.6817	8.76e-12	6.57e-10	up
Novel_009646	XLOC_106021	.	20.6786	8.81e-12	6.6e-10	up
Novel_005821	XLOC_061643	.	20.67	9e-12	6.73e-10	up
XM_018048699.1	gene-CACNA1C	CACNA1C	20.6688	9.03e-12	6.74e-10	up
Novel_008980	XLOC_099602	.	20.6682	9.05e-12	6.74e-10	up
Novel_012936	XLOC_144127	.	20.6688	9.03e-12	6.74e-10	up
Novel_012930	XLOC_144002	.	20.6481	9.24e-12	6.87e-10	up
Novel_012723	XLOC_141327	.	20.6569	9.29e-12	6.9e-10	up
Novel_001890	XLOC_022085	.	20.6411	9.64e-12	7.15e-10	up
Novel_006584	XLOC_070333	.	20.6354	9.77e-12	7.24e-10	up
Novel_007037	XLOC_075903	.	20.6242	1e-11	7.42e-10	up
XM_018060598.1	gene-KAZN	KAZN	20.6027	1.01e-11	7.48e-10	up
Novel_021790	XLOC_223962	.	20.6042	1.02e-11	7.49e-10	up
Novel_022084	XLOC_228156	.	20.6042	1.02e-11	7.49e-10	up
XM_018057810.1	gene-DLGAP4	DLGAP4	20.5894	1.08e-11	7.98e-10	up
XM_018051572.1	gene-LOC102176218	LOC102176218	20.5904	1.08e-11	7.98e-10	up
Novel_015127	XLOC_165465	.	20.5894	1.08e-11	7.98e-10	up
Novel_018919	XLOC_198672	.	20.5894	1.08e-11	7.98e-10	up
Novel_018508	XLOC_194919	.	20.588	1.09e-11	8.02e-10	up
XM_018038704.1	gene-ANKS1A	ANKS1A	20.581	1.11e-11	8.13e-10	up
Novel_001290	XLOC_015184	.	20.581	1.11e-11	8.13e-10	up
Novel_012402	XLOC_137281	.	20.5781	1.12e-11	8.16e-10	up
Novel_024353	XLOC_255907	.	20.5787	1.11e-11	8.16e-10	up
XM_018057052.1	gene-PARD3	PARD3	20.5725	1.13e-11	8.25e-10	up
Novel_010063	XLOC_111222	.	20.5725	1.13e-11	8.25e-10	up
XM_018059781.1	gene-NCAM1	NCAM1	20.5656	1.15e-11	8.37e-10	up
Novel_011534	XLOC_127953	.	20.5656	1.15e-11	8.37e-10	up
Novel_020615	XLOC_213569	.	20.5538	1.18e-11	8.6e-10	up
Novel_010419	XLOC_115639	.	-20.5446	1.21e-11	8.81e-10	down
Novel_002343	XLOC_027185	.	20.5391	1.22e-11	8.86e-10	up
Novel_021837	XLOC_224437	.	20.5391	1.22e-11	8.86e-10	up
Novel_016833	XLOC_177976	.	20.5288	1.25e-11	9.06e-10	up
Novel_011353	XLOC_125415	.	-11.6745	1.26e-11	9.07e-10	down
XM_005701097.3	gene-GPM6B	GPM6B	20.5189	1.28e-11	9.2e-10	up
XR_001919358.1	gene-MN1	MN1	20.5189	1.28e-11	9.2e-10	up
XM_013969794.2	gene-SLC1A2	SLC1A2	-20.5204	1.28e-11	9.2e-10	down
Novel_010436	XLOC_115860	.	20.5201	1.28e-11	9.2e-10	up
Novel_016987	XLOC_179438	.	20.5189	1.28e-11	9.2e-10	up
XM_018054008.1	gene-RGS6	RGS6	20.517	1.29e-11	9.23e-10	up
Novel_019139	XLOC_200467	.	20.5151	1.29e-11	9.27e-10	up
Novel_024323	XLOC_255504	.	20.5138	1.3e-11	9.28e-10	up
Novel_020018	XLOC_208028	.	8.16753	1.36e-11	9.76e-10	up
Novel_006603	XLOC_070442	.	20.4868	1.38e-11	9.86e-10	up
Novel_004550	XLOC_050100	.	20.4828	1.39e-11	9.94e-10	up
Novel_006933	XLOC_074518	.	20.4828	1.39e-11	9.94e-10	up
XM_018041219.1	gene-TCF7L2	TCF7L2	20.4771	1.41e-11	1e-09	up
XM_018063473.1	gene-BAZ2B	BAZ2B	20.4451	1.52e-11	1.08e-09	up
XM_018054996.1	gene-CCDC142	CCDC142	20.4459	1.52e-11	1.08e-09	up
Novel_008324	XLOC_090307	.	7.07995	1.53e-11	1.08e-09	up
Novel_020797	XLOC_214559	.	20.4459	1.52e-11	1.08e-09	up
XM_018059780.1	gene-NCAM1	NCAM1	20.4283	1.58e-11	1.12e-09	up
XM_018047632.1	gene-TMCC3	TMCC3	20.416	1.63e-11	1.15e-09	up
Novel_021441	XLOC_219389	.	20.416	1.63e-11	1.15e-09	up
Novel_009055	XLOC_099907	.	20.3976	1.7e-11	1.2e-09	up
Novel_012935	XLOC_144127	.	20.3976	1.7e-11	1.2e-09	up
XM_013964218.2	gene-A2ML1	A2ML1	20.3813	1.76e-11	1.24e-09	up
Novel_010850	XLOC_120526	.	20.3626	1.84e-11	1.3e-09	up
Novel_009626	XLOC_105987	.	20.3557	1.87e-11	1.31e-09	up
Novel_016141	XLOC_174126	.	20.3355	1.87e-11	1.31e-09	up
Novel_018821	XLOC_198134	.	20.3557	1.87e-11	1.31e-09	up
XM_005686368.3	gene-TPRKB	TPRKB	20.3218	1.94e-11	1.36e-09	up
Novel_014624	XLOC_159906	.	20.3089	1.98e-11	1.39e-09	up
XM_018063900.1	gene-C19H17orf80	C19H17orf80	20.3244	2.01e-11	1.4e-09	up
Novel_004328	XLOC_048230	.	20.3244	2.01e-11	1.4e-09	up
Novel_019520	XLOC_203430	.	20.3244	2.01e-11	1.4e-09	up
XM_018046097.1	gene-RORC	RORC	20.3061	2.03e-11	1.41e-09	up
Novel_015035	XLOC_164233	.	20.3061	2.03e-11	1.41e-09	up
Novel_001442	XLOC_017318	.	20.3029	2.12e-11	1.47e-09	up
Novel_021629	XLOC_221953	.	20.3029	2.12e-11	1.47e-09	up
Novel_022630	XLOC_234424	.	20.3029	2.12e-11	1.47e-09	up
XM_018048022.1	gene-GLI1	GLI1	20.2924	2.17e-11	1.5e-09	up
Novel_013363	XLOC_148110	.	20.2708	2.16e-11	1.5e-09	up
Novel_005642	XLOC_059791	.	-20.2452	2.33e-11	1.61e-09	down
Novel_011397	XLOC_126123	.	-20.2452	2.33e-11	1.61e-09	down
Novel_012893	XLOC_143566	.	-20.2452	2.33e-11	1.61e-09	down
Novel_014741	XLOC_160470	.	20.2563	2.36e-11	1.63e-09	up
Novel_016984	XLOC_179438	.	20.2563	2.36e-11	1.63e-09	up
Novel_004803	XLOC_052512	.	20.2402	2.45e-11	1.69e-09	up
Novel_016413	XLOC_175689	.	20.2402	2.45e-11	1.69e-09	up
Novel_019060	XLOC_200273	.	20.2264	2.52e-11	1.74e-09	up
Novel_019625	XLOC_204072	.	20.2264	2.52e-11	1.74e-09	up
Novel_007480	XLOC_079872	.	20.1693	2.88e-11	1.98e-09	up
Novel_016039	XLOC_173637	.	20.1693	2.88e-11	1.98e-09	up
XM_013965751.2	gene-LOC108633191	LOC108633191	-4.49035	3.07e-11	2.11e-09	down
XM_018055699.1	gene-RNF144A	RNF144A	20.1358	3.11e-11	2.13e-09	up
Novel_013854	XLOC_153375	.	20.1358	3.11e-11	2.13e-09	up
Novel_008180	XLOC_089473	.	20.0978	3.39e-11	2.32e-09	up
Novel_018968	XLOC_198963	.	19.9137	4.97e-11	3.39e-09	up
Novel_005485	XLOC_057429	.	19.8889	5.1e-11	3.48e-09	up
Novel_008011	XLOC_087654	.	19.8487	5.6e-11	3.82e-09	up
Novel_006787	XLOC_071023	.	19.834	5.76e-11	3.93e-09	up
Novel_006212	XLOC_065919	.	19.8373	5.82e-11	3.96e-09	up
Novel_008603	XLOC_094273	.	19.8373	5.82e-11	3.96e-09	up
Novel_011095	XLOC_122028	.	-6.28621	6.04e-11	4.11e-09	down
XM_013967459.2	gene-IL1R1	IL1R1	19.7709	6.62e-11	4.49e-09	up
Novel_009844	XLOC_108855	.	-19.7666	6.77e-11	4.59e-09	down
XM_018060008.1	gene-PLEKHA6	PLEKHA6	19.7606	7.13e-11	4.82e-09	up
Novel_013981	XLOC_154347	.	19.7606	7.13e-11	4.82e-09	up
XM_005680343.3	gene-TIMELESS	TIMELESS	8.69322	7.26e-11	4.9e-09	up
Novel_020335	XLOC_210896	.	19.626	9.11e-11	6.15e-09	up
Novel_003294	XLOC_036558	.	19.487	1.26e-10	8.49e-09	up
Novel_012077	XLOC_133360	.	19.487	1.26e-10	8.49e-09	up
Novel_022242	XLOC_230400	.	19.487	1.26e-10	8.49e-09	up
Novel_022894	XLOC_236781	.	19.487	1.26e-10	8.49e-09	up
Novel_011304	XLOC_125053	.	-19.4334	1.42e-10	9.55e-09	down
XM_005688967.3	gene-PCMTD1	PCMTD1	-11.2619	1.98e-10	1.33e-08	down
XM_018062467.1	gene-CIC	CIC	8.47658	2.04e-10	1.37e-08	up
Novel_003061	XLOC_034416	.	19.2448	2.12e-10	1.42e-08	up
Novel_015343	XLOC_167937	.	19.2448	2.12e-10	1.42e-08	up
Novel_020170	XLOC_209669	.	19.2448	2.12e-10	1.42e-08	up
XM_018058538.1	gene-ATAD2	ATAD2	19.2391	2.15e-10	1.44e-08	up
XM_018047324.1	gene-KLHL7	KLHL7	8.26052	3.62e-10	2.42e-08	up
Novel_008320	XLOC_090307	.	7.07608	3.72e-10	2.49e-08	up
XM_018050317.1	gene-MATR3	MATR3	4.21057	1e-09	6.68e-08	up
XM_018064717.1	gene-NCOR1	NCOR1	11.0725	3.39e-09	2.26e-07	up
Novel_012214	XLOC_135163	.	-5.0978	6.04e-09	4.02e-07	down
Novel_011897	XLOC_131608	.	10.0025	6.51e-09	4.33e-07	up
XM_018046856.1	gene-AGK	AGK	-10.1265	7.43e-09	4.94e-07	down
XM_018046876.1	gene-HIPK2	HIPK2	-12.9262	1.28e-08	8.49e-07	down
Novel_006717	XLOC_070767	.	-6.4914	1.5e-08	9.94e-07	down
XM_018057561.1	gene-ARFGAP1	ARFGAP1	1.82762	1.55e-08	1.03e-06	up
XM_005678323.2	gene-ATG4C	ATG4C	-1.57928	1.7e-08	1.13e-06	down
XM_018066996.1	gene-LOC102177570	LOC102177570	10.2532	1.86e-08	1.23e-06	up
Novel_015878	XLOC_172826	.	-7.77558	3.35e-08	2.21e-06	down
XM_018050900.1	gene-SAFB	SAFB	-6.77188	4.27e-08	2.82e-06	down
XM_005691437.3	gene-GPN3	GPN3	-0.27889	5.25e-08	3.46e-06	down
XM_018039834.1	gene-STK25	STK25	-4.11478	5.68e-08	3.75e-06	down
XM_018060766.1	gene-RCOR3	RCOR3	2.70043	5.71e-08	3.76e-06	up
XM_018044136.1	gene-THOC2	THOC2	-10.9729	7.26e-08	4.78e-06	down
XM_018041594.1	gene-KIF20B	KIF20B	-5.42076	8.51e-08	5.6e-06	down
XM_018051105.1	gene-DOCK6	DOCK6	-11.9071	9.77e-08	6.42e-06	down
XM_018051264.1	gene-HOOK2	HOOK2	1.14191	1.03e-07	6.74e-06	up
XM_018039691.1	gene-C24H18orf32	C24H18orf32	-0.883555	1.16e-07	7.59e-06	down
Novel_009578	XLOC_105270	.	9.1004	1.36e-07	8.92e-06	up
Novel_017871	XLOC_188208	.	-9.00992	1.44e-07	9.43e-06	down
XM_018046638.1	gene-DNAJB6	DNAJB6	-2.46054	1.45e-07	9.47e-06	down
Novel_003055	XLOC_034414	.	-7.21131	1.58e-07	1.04e-05	down
Novel_014744	XLOC_160470	.	9.19063	1.88e-07	1.23e-05	up
Novel_014334	XLOC_157577	.	8.85607	2.11e-07	1.38e-05	up
Novel_016637	XLOC_177066	.	-6.75644	2.21e-07	1.44e-05	down
XM_018052891.1	gene-PHIP	PHIP	7.79843	2.39e-07	1.56e-05	up
XM_018055024.1	gene-TET3	TET3	-8.66344	2.49e-07	1.63e-05	down
Novel_014304	XLOC_157293	.	8.66609	2.53e-07	1.65e-05	up
Novel_015259	XLOC_166720	.	8.4466	2.57e-07	1.67e-05	up
Novel_007843	XLOC_085083	.	10.7645	3.05e-07	1.98e-05	up
Novel_011904	XLOC_131646	.	-7.23572	3.07e-07	2e-05	down
Novel_018606	XLOC_195930	.	-10.0506	3.48e-07	2.26e-05	down
XM_018043454.1	gene-PPP2R5B	PPP2R5B	8.69394	4.69e-07	3.05e-05	up
XM_018046972.1	gene-IGF2BP2	IGF2BP2	8.84927	4.92e-07	3.19e-05	up
XM_018050314.1	gene-MATR3	MATR3	-1.21954	5.01e-07	3.25e-05	down
XM_005697758.3	gene-CRCP	CRCP	-0.826532	5.04e-07	3.27e-05	down
XM_018052346.1	gene-PPP2R2A	PPP2R2A	6.3792	5.52e-07	3.57e-05	up
XM_018063895.1	gene-COG1	COG1	8.56767	5.82e-07	3.76e-05	up
Novel_023608	XLOC_248066	.	-9.00239	5.83e-07	3.77e-05	down
XR_001918990.1	gene-MLLT10	MLLT10	-1.15607	7.35e-07	4.74e-05	down
XM_018056497.1	gene-KCTD12	KCTD12	-0.41462	8.49e-07	5.48e-05	down
XM_013963941.2	gene-PAN2	PAN2	9.25605	8.52e-07	5.49e-05	up
XM_018041900.1	gene-TACC1	TACC1	8.42012	9.11e-07	5.87e-05	up
XM_005683180.3	gene-SMIM3	SMIM3	0.335054	9.36e-07	6.03e-05	up
Novel_005846	XLOC_061804	.	8.42978	9.37e-07	6.03e-05	up
Novel_005634	XLOC_059771	.	9.56675	1.03e-06	6.63e-05	up
XM_018039428.1	gene-PRELID3A	PRELID3A	-7.18312	1.08e-06	6.91e-05	down
XM_018054030.1	gene-SRSF5	SRSF5	-4.07226	1.08e-06	6.91e-05	down
Novel_023309	XLOC_243289	.	5.19668	1.15e-06	7.38e-05	up
XM_018055881.1	gene-ODF2	ODF2	-4.0025	1.28e-06	8.2e-05	down
Novel_022873	XLOC_236708	.	8.2033	1.31e-06	8.38e-05	up
XM_005682294.3	gene-LOC102183952	LOC102183952	-8.68754	1.32e-06	8.47e-05	down
Novel_012705	XLOC_140930	.	-8.3074	1.51e-06	9.65e-05	down
Novel_002867	XLOC_031761	.	7.4789	1.54e-06	9.82e-05	up
XM_013969466.2	gene-MARCH7	2021-03-07	-3.26228	1.6e-06	0.000101774	down
XM_005693412.3	gene-TAX1BP3	TAX1BP3	-4.46325	1.64e-06	0.000104488	down
XR_001919226.1	gene-RNF121	RNF121	3.83937	1.81e-06	0.000115041	up
XM_018046535.1	gene-ATP13A3	ATP13A3	5.6834	1.83e-06	0.000116415	up
XM_018052802.1	gene-TTC3	TTC3	1.0106	1.87e-06	0.00011909	up
XM_018060214.1	gene-ENAH	ENAH	-9.44556	1.92e-06	0.000121752	down
Novel_014254	XLOC_156753	.	8.14182	2.05e-06	0.000130029	up
XM_018055457.1	gene-AAK1	AAK1	-8.34517	2.33e-06	0.00014798	down
Novel_003306	XLOC_036645	.	5.04942	2.54e-06	0.000160911	up
XM_018061463.1	gene-ZNF605	ZNF605	7.06167	2.65e-06	0.000167778	up
Novel_014738	XLOC_160470	.	-6.81391	2.73e-06	0.000172853	down
XM_018062256.1	gene-ZNF507	ZNF507	-6.58121	3.04e-06	0.000191987	down
XM_005680477.3	gene-SLC25A3	SLC25A3	2.3507	3.16e-06	0.000199885	up
XM_018056762.1	gene-ZC3H13	ZC3H13	-6.15147	3.21e-06	0.000202944	down
Novel_008441	XLOC_091720	.	-9.41376	3.41e-06	0.000215029	down
Novel_008975	XLOC_099594	.	-1.74698	3.52e-06	0.000221929	down
XM_018048528.1	gene-TIAM1	TIAM1	7.74772	3.9e-06	0.000245728	up
XM_005699158.3	gene-PSAP	PSAP	9.4782	4.17e-06	0.000261866	up
Novel_001737	XLOC_020330	.	13.0504	4.44e-06	0.00027906	up
XM_018066145.1	gene-POLG	POLG	6.18628	4.48e-06	0.000281287	up
XM_018055884.1	gene-ODF2	ODF2	-7.71385	4.81e-06	0.000301567	down
Novel_002501	XLOC_028863	.	8.0739	4.84e-06	0.0003033	up
Novel_008313	XLOC_090307	.	8.7472	4.91e-06	0.000307566	up
Novel_009391	XLOC_103428	.	6.97657	5.13e-06	0.000321229	up
Novel_010207	XLOC_113279	.	6.99105	5.31e-06	0.000331886	up
Novel_012440	XLOC_137626	.	7.09357	5.51e-06	0.000344101	up
XM_005694464.3	gene-C19H17orf80	C19H17orf80	1.41576	5.58e-06	0.000348321	up
Novel_002018	XLOC_024021	.	-11.5495	5.65e-06	0.000352363	down
Novel_012183	XLOC_134851	.	-7.95445	6.25e-06	0.000389811	down
Novel_023903	XLOC_250530	.	-8.82588	6.35e-06	0.000395465	down
XM_018057142.1	gene-EPB41	EPB41	7.79975	6.53e-06	0.000406279	up
Novel_003319	XLOC_036774	.	-5.01272	6.6e-06	0.000410553	down
XM_013963942.2	gene-PAN2	PAN2	9.16821	6.94e-06	0.000431386	up
XM_018044169.1	gene-COL4A5	COL4A5	5.31048	6.96e-06	0.000432251	up
Novel_009620	XLOC_105922	.	-8.25954	7.31e-06	0.000453558	down
XM_018052686.1	gene-TRIM32	TRIM32	9.47446	8.4e-06	0.000520307	up
XM_005674783.3	gene-ROBO1	ROBO1	-6.5915	8.53e-06	0.000528028	down
XM_013968280.2	gene-CENPJ	CENPJ	8.8243	9.02e-06	0.000558186	up
XM_018055975.1	gene-FNBP1	FNBP1	-5.60013	9.24e-06	0.00057103	down
XM_018038865.1	gene-DDR1	DDR1	8.7367	9.47e-06	0.000584619	up
XR_001918693.1	gene-VPS39	VPS39	6.7448	9.69e-06	0.000597762	up
Novel_019739	XLOC_205608	.	7.40427	1e-05	0.000617692	up
XM_018059332.1	gene-LOC102179090	LOC102179090	7.42397	1.04e-05	0.000638248	up
Novel_022910	XLOC_236866	.	4.80839	1.11e-05	0.000684872	up
XM_013976540.2	gene-KDM5C	KDM5C	-9.88428	1.13e-05	0.00069436	down
Novel_005059	XLOC_054485	.	7.82603	1.19e-05	0.000729802	up
XM_018039530.1	gene-ATP9B	ATP9B	4.63716	1.22e-05	0.000751696	up
XM_018046339.1	gene-KIRREL	KIRREL	-5.57578	1.28e-05	0.000787287	down
XM_018046698.1	gene-WDR86	WDR86	-9.13184	1.29e-05	0.000787464	down
XM_018058624.1	gene-TRIP12	TRIP12	0.904862	1.33e-05	0.000810991	up
XM_018060327.1	gene-MFN2	MFN2	-6.5688	1.34e-05	0.000816546	down
XM_018059825.1	gene-FN1	FN1	-3.58897	1.34e-05	0.000817392	down
XR_001919602.1	gene-LOC102174870	LOC102174870	8.48886	1.34e-05	0.000817392	up
XM_018050478.1	gene-ARHGAP45	ARHGAP45	-5.5875	1.45e-05	0.00088608	down
Novel_002315	XLOC_026700	.	-7.97148	1.45e-05	0.00088608	down
Novel_015982	XLOC_173342	.	6.71573	1.5e-05	0.000913384	up
XM_018045695.1	gene-SH3GLB1	SH3GLB1	-0.699129	1.58e-05	0.000962746	down
XM_018059006.1	gene-NCAPD3	NCAPD3	-3.73784	1.61e-05	0.000982119	down
Novel_018188	XLOC_191207	.	1.13737	1.78e-05	0.00107975	up
XM_018047875.1	gene-HDAC7	HDAC7	2.95744	1.81e-05	0.00110081	up
XM_018050196.1	gene-LARS	LARS	-7.48838	1.9e-05	0.00115561	down
XM_018039812.1	gene-GRP	GRP	-8.4093	1.92e-05	0.00116741	down
XM_018053644.1	gene-VWA9	VWA9	-9.43693	2.01e-05	0.00121694	down
XM_005697051.3	gene-RBBP8	RBBP8	-0.957381	2.08e-05	0.00125932	down
XM_005679214.3	gene-RELN	RELN	-6.43308	2.18e-05	0.00132153	down
Novel_003897	XLOC_043575	.	7.84083	2.22e-05	0.00134231	up
XM_005693137.3	gene-INTS2	INTS2	-0.853889	2.27e-05	0.00137448	down
Novel_007035	XLOC_075903	.	7.1118	2.38e-05	0.00143591	up
XM_018059793.1	gene-FN1	FN1	-3.44921	2.38e-05	0.00143855	down
XM_018054292.1	gene-TLN2	TLN2	-7.22925	2.41e-05	0.00144953	down
Novel_000339	XLOC_004096	.	6.01375	2.63e-05	0.00158241	up
XM_018046536.1	gene-IFNGR2	IFNGR2	2.17236	2.65e-05	0.00159602	up
Novel_002081	XLOC_024653	.	3.7687	2.69e-05	0.00161913	up
XM_018064918.1	gene-ZNF652	ZNF652	3.37341	2.7e-05	0.00162164	up
XM_005687439.3	gene-LCP1	LCP1	-9.01462	2.87e-05	0.00172318	down
Novel_022331	XLOC_231484	.	-2.18409	2.89e-05	0.00173242	down
Novel_003352	XLOC_036774	.	8.08248	2.97e-05	0.00178152	up
XM_018050048.1	gene-MORC1	MORC1	4.51019	3e-05	0.0017947	up
Novel_003320	XLOC_036774	.	7.14793	3.01e-05	0.00180086	up
XM_018042833.1	gene-DLG2	DLG2	-8.04122	3.07e-05	0.00183283	down
XM_018060647.1	gene-ABI2	ABI2	-8.34558	3.08e-05	0.00183596	down
XM_018044710.1	gene-NSDHL	NSDHL	-3.16226	3.12e-05	0.00186101	down
Novel_007732	XLOC_083799	.	-6.79842	3.27e-05	0.00194567	down
XM_018039903.1	gene-ZNF789	ZNF789	0.686356	3.28e-05	0.00195152	up
Novel_001603	XLOC_019391	.	7.54249	3.31e-05	0.00196875	up
XM_005691431.2	gene-VPS29	VPS29	8.1793	3.32e-05	0.00197203	up
XM_005697176.3	gene-PIAS2	PIAS2	5.07023	3.34e-05	0.00197937	up
XM_018066067.1	gene-PPP2R5C	PPP2R5C	-6.47663	3.49e-05	0.00206816	down
Novel_014104	XLOC_155563	.	5.18265	3.53e-05	0.00209229	up
XM_018038762.1	gene-BAG6	BAG6	-3.68219	3.58e-05	0.00212094	down
Novel_013368	XLOC_148110	.	7.23559	3.59e-05	0.00212292	up
XM_018061136.1	gene-PXN	PXN	-4.10309	3.67e-05	0.0021736	down
Novel_009724	XLOC_106823	.	7.35148	3.76e-05	0.00222243	up
Novel_019929	XLOC_206944	.	-8.58797	3.88e-05	0.00229007	down
Novel_005861	XLOC_061934	.	7.62298	3.88e-05	0.00229229	up
XM_013968475.2	gene-ROBO1	ROBO1	4.51788	3.91e-05	0.00230692	up
XM_018059054.1	gene-CLP1	CLP1	9.93921	3.95e-05	0.0023283	up
Novel_022213	XLOC_230006	.	-6.54269	4.06e-05	0.00239003	down
XM_018052995.1	gene-PKIB	PKIB	6.54139	4.07e-05	0.00239448	up
XM_013970458.2	gene-KLHL12	KLHL12	-10.0441	4.11e-05	0.0024174	down
Novel_019362	XLOC_202601	.	10.0338	4.15e-05	0.0024372	up
Novel_011110	XLOC_122254	.	-3.90726	4.16e-05	0.00244298	down
Novel_019715	XLOC_205473	.	-5.96896	4.22e-05	0.00247331	down
XM_018052904.1	gene-TTK	TTK	-5.49091	4.22e-05	0.00247504	down
XM_005675697.3	gene-TTC3	TTC3	-1.64443	4.25e-05	0.00249029	down
Novel_018463	XLOC_194646	.	8.37317	4.32e-05	0.0025267	up
XM_018065971.1	gene-ZNF774	ZNF774	3.24679	4.58e-05	0.0026755	up
XM_018054306.1	gene-TPM1	TPM1	5.88109	4.68e-05	0.00273536	up
XM_018038913.1	gene-TNXB	TNXB	-1.88546	4.73e-05	0.00275912	down
Novel_009627	XLOC_105987	.	6.64795	4.82e-05	0.00281158	up
XM_005680546.3	gene-C5H12orf73	C5H12orf73	1.43221	4.87e-05	0.00283652	up
ND3	gene-ND3	ND3	0.667396	4.9e-05	0.00285212	up
XM_018050469.1	gene-SBNO2	SBNO2	-9.86567	5.03e-05	0.00292777	down
NM_001285650.1	gene-LGALS16	LGALS16	-8.74068	5.27e-05	0.00306208	down
XM_018061103.1	gene-MVK	MVK	-9.95649	5.4e-05	0.00313751	down
XM_018059506.1	gene-ST5	ST5	2.21834	5.51e-05	0.00319815	up
XM_018048105.1	gene-DGKA	DGKA	-3.8509	5.63e-05	0.00326664	down
Novel_014551	XLOC_159476	.	5.65481	5.81e-05	0.00336422	up
XM_013967703.2	gene-NAB1	NAB1	1.91944	5.85e-05	0.00338367	up
Novel_013334	XLOC_147702	.	7.15374	6.05e-05	0.00349779	up
XM_018048546.1	gene-ATN1	ATN1	5.31175	6.14e-05	0.00355009	up
XM_018046992.1	gene-CDK13	CDK13	6.59162	6.21e-05	0.00358579	up
XM_018063485.1	gene-BAZ2B	BAZ2B	-4.82679	6.49e-05	0.0037435	down
XM_018052679.1	gene-TNC	TNC	-3.88526	6.5e-05	0.00374921	down
XM_018060973.1	gene-FAM126B	FAM126B	3.05584	6.57e-05	0.00378297	up
XM_018043434.1	gene-MYRF	MYRF	7.91076	6.69e-05	0.00385428	up
XM_018062131.1	gene-FHOD1	FHOD1	-9.63912	6.74e-05	0.00388026	down
Novel_022756	XLOC_235560	.	-9.71278	6.91e-05	0.00396837	down
XM_018047261.1	gene-RELN	RELN	-4.8751	7.26e-05	0.00416868	down
Novel_019237	XLOC_200958	.	8.57787	7.34e-05	0.00421313	up
XM_018052413.1	gene-GKAP1	GKAP1	-9.94618	7.4e-05	0.00424644	down
XM_005675157.3	gene-KNG1	KNG1	-5.88514	7.59e-05	0.00434804	down
XM_005695774.3	gene-FAM107A	FAM107A	1.36047	7.78e-05	0.00445507	up
XM_005675932.3	gene-HOXD10	HOXD10	-5.43883	8.21e-05	0.00469611	down
XM_018052662.1	gene-COL27A1	COL27A1	-9.57773	8.31e-05	0.0047454	down
XM_018066710.1	gene-PBRM1	PBRM1	-6.28236	8.36e-05	0.00477474	down
Novel_011914	XLOC_131776	.	-0.94449	8.51e-05	0.00485421	down
Novel_007938	XLOC_086068	.	-7.42789	8.73e-05	0.00497582	down
XM_018045934.1	gene-BCL2L15	BCL2L15	-5.96843	8.86e-05	0.00504411	down
XM_018066646.1	gene-USP19	USP19	4.28298	9.52e-05	0.00541955	up
XM_018065554.1	gene-PDZD2	PDZD2	-9.75714	9.59e-05	0.00545116	down
Novel_016216	XLOC_174571	.	-1.0173	9.81e-05	0.00557686	down
XM_018066244.1	gene-PPIP5K1	PPIP5K1	-9.54555	9.87e-05	0.00560004	down
XM_018062431.1	gene-SPOPL	SPOPL	-1.5957	9.86e-05	0.00560004	down
XM_013964217.2	gene-M6PR	M6PR	-5.29672	9.92e-05	0.0056217	down
XM_018054925.1	gene-TBC1D8	TBC1D8	-3.57758	9.99e-05	0.00565887	down
Novel_012611	XLOC_140105	.	7.29125	0.000100001	0.0056605	up
Novel_015643	XLOC_170448	.	-8.10051	0.000100187	0.00566732	down
XM_018046738.1	gene-LOC102184497	LOC102184497	-1.87685	0.000100909	0.00570443	down
Novel_005421	XLOC_057209	.	9.50685	0.000101705	0.00574572	up
XM_018058558.1	gene-ZNF572	ZNF572	9.48894	0.000102107	0.00576468	up
XM_018041575.1	gene-SLC16A12	SLC16A12	-4.87676	0.000102429	0.00577909	down
XM_018039782.1	gene-ZBTB14	ZBTB14	7.82563	0.000103989	0.00586296	up
XM_018063598.1	gene-DZIP3	DZIP3	-4.29152	0.000104933	0.00590886	down
Novel_018266	XLOC_191736	.	6.51374	0.000105395	0.00593103	up
XM_018064162.1	gene-GGNBP2	GGNBP2	-1.84641	0.000105891	0.00595506	down
Novel_015958	XLOC_173265	.	5.2391	0.000106921	0.00600523	up
Novel_018577	XLOC_195930	.	11.7251	0.000106882	0.00600523	up
XM_018057706.1	gene-NOL4L	NOL4L	6.439	0.000107324	0.00602397	up
XM_018063925.1	gene-ABCA6	ABCA6	-4.38576	0.000109401	0.00613654	down
Novel_010425	XLOC_115801	.	6.5183	0.000110209	0.00617789	up
Novel_014105	XLOC_155563	.	9.78412	0.000114547	0.00640867	up
Novel_009704	XLOC_106617	.	-9.26795	0.000118083	0.00660221	down
XM_018043897.1	gene-MSL3	MSL3	0.624057	0.000119574	0.00668132	up
XM_018059346.1	gene-XRRA1	XRRA1	9.32609	0.000123941	0.00691638	up
Novel_010583	XLOC_116444	.	6.12842	0.000123897	0.00691638	up
Novel_012804	XLOC_142671	.	4.14659	0.000124314	0.00693276	up
Novel_016342	XLOC_175277	.	8.7296	0.000124569	0.00694251	up
XM_018038327.1	gene-ABHD5	ABHD5	3.7596	0.000127614	0.00710767	up
XM_018059785.1	gene-FN1	FN1	-2.41185	0.000127901	0.00711911	down
XM_013974607.2	gene-EIF4G3	EIF4G3	-6.01288	0.00012883	0.00716621	down
XM_013971270.2	gene-AP1G1	AP1G1	6.47239	0.000131108	0.00728827	up
Novel_020152	XLOC_209376	.	-6.78726	0.000132713	0.00737274	down
XM_018061874.1	gene-ACSF3	ACSF3	4.41814	0.000135235	0.00750803	up
Novel_018573	XLOC_195929	.	7.23493	0.00013699	0.00760065	up
Novel_023674	XLOC_248737	.	-7.67441	0.000137762	0.00763858	down
XM_018042874.1	gene-SSH3	SSH3	-0.470658	0.000138984	0.00770139	down
Novel_023597	XLOC_247919	.	7.03888	0.000143404	0.00794125	up
Novel_008226	XLOC_089630	.	7.68588	0.000143644	0.00794948	up
XM_018066879.1	gene-LRRFIP2	LRRFIP2	-6.30637	0.000144001	0.00796416	down
XM_018055702.1	gene-RSAD2	RSAD2	-1.35224	0.000145291	0.0080304	down
Novel_011691	XLOC_130188	.	8.19619	0.000146592	0.00809717	up
XM_018064234.1	gene-PPIG	PPIG	-6.58535	0.000148579	0.00820169	down
XM_018040581.1	gene-ACHE	ACHE	5.48024	0.000150592	0.00830755	up
XM_018066391.1	gene-MBIP	MBIP	6.23177	0.00015088	0.00831813	up
XM_018064161.1	gene-GGNBP2	GGNBP2	-1.76456	0.000152305	0.00839134	down
Novel_023125	XLOC_240334	.	-6.94436	0.000152872	0.00841726	down
Novel_008228	XLOC_089630	.	9.27857	0.000153953	0.00847141	up
Novel_011011	XLOC_121561	.	5.83391	0.000155932	0.00857488	up
XM_013963599.2	gene-TMEM176B	TMEM176B	5.94474	0.000157507	0.008656	up
XM_018045946.1	gene-DENND2C	DENND2C	-5.40047	0.000159704	0.00877121	down
XM_018065418.1	gene-GPS1	GPS1	-1.92327	0.00015994	0.00877863	down
Novel_011382	XLOC_125946	.	5.77133	0.000161442	0.00885544	up
Novel_004177	XLOC_047556	.	5.01244	0.000161619	0.00885956	up
XM_018057926.1	gene-DBNDD2	DBNDD2	-2.01785	0.000167832	0.00919431	down
XM_018053016.1	gene-MCM9	MCM9	-5.9317	0.000168008	0.00919818	down
XM_018041131.1	gene-ZSCAN20	ZSCAN20	-11.3827	0.000169089	0.00925155	down
Novel_018191	XLOC_191207	.	-8.08523	0.00017377	0.00949565	down
XM_018053748.1	gene-APC	APC	6.06839	0.000174004	0.00950247	up
XM_018066281.1	gene-CTAGE5	CTAGE5	6.05824	0.000177189	0.00967035	up
XM_018057099.1	gene-KIAA1217	KIAA1217	-3.47517	0.000181116	0.00987846	down
Novel_017454	XLOC_182972	.	3.22792	0.000182153	0.00992879	up
XM_018040563.1	gene-KNOP1	KNOP1	9.04333	0.000185041	0.0100736	up
XM_018050149.1	gene-NDST1	NDST1	-0.843056	0.000186993	0.0101734	down
XM_005699275.3	gene-FAM213A	FAM213A	-2.85075	0.000187355	0.0101867	down
XM_018067221.1	gene-SLC4A7	SLC4A7	4.51244	0.000189092	0.0102683	up
Novel_008285	XLOC_089977	.	6.34402	0.000189088	0.0102683	up
XM_005697930.3	gene-HMOX2	HMOX2	4.03043	0.000189932	0.0103075	up
Novel_010931	XLOC_121315	.	-6.19397	0.000190346	0.0103235	down
XM_005700243.3	gene-TMEM164	TMEM164	6.50715	0.000190565	0.0103289	up
XM_018043000.1	gene-HPS5	HPS5	-9.05382	0.000191855	0.01039	down
XM_018042220.1	gene-RUFY2	RUFY2	-5.82282	0.000192051	0.01039	down
Novel_012410	XLOC_137388	.	3.42924	0.000191966	0.01039	up
XM_018050313.1	gene-MATR3	MATR3	1.39154	0.000192212	0.0103923	up
Novel_020887	XLOC_214969	.	-9.17531	0.000193375	0.0104486	down
Novel_009561	XLOC_105049	.	-9.01687	0.000199725	0.0107783	down
Novel_002392	XLOC_027740	.	-8.53287	0.000202494	0.0109156	down
Novel_014501	XLOC_159082	.	4.3848	0.00020252	0.0109156	up
XM_013966987.2	gene-NDUFAF1	NDUFAF1	-1.17387	0.000203525	0.010963	down
Novel_018562	XLOC_195898	.	2.62767	0.000205236	0.0110414	up
XM_018040455.1	gene-HAGHL	HAGHL	5.87759	0.000206187	0.0110857	up
XM_018055882.1	gene-ODF2	ODF2	-3.475	0.000207126	0.0111293	down
XM_018052148.1	gene-RGP1	RGP1	-4.20195	0.000211036	0.0113324	down
XM_018062038.1	gene-RSPRY1	RSPRY1	9.04597	0.000214273	0.0114849	up
Novel_016577	XLOC_176690	.	7.3961	0.000217128	0.0116236	up
Novel_012181	XLOC_134843	.	9.08575	0.000218145	0.0116708	up
XM_005678424.3	gene-BTF3L4	BTF3L4	-4.81849	0.000218391	0.0116768	down
XM_013970019.2	gene-PFKFB2	PFKFB2	-6.78411	0.000225627	0.0120488	down
XM_018040991.1	gene-C25H16orf59	C25H16orf59	-7.30868	0.000226289	0.0120768	down
Novel_006230	XLOC_065979	.	-7.18955	0.000227397	0.0121284	down
Novel_000435	XLOC_004795	.	-8.72735	0.000229304	0.0122226	down
Novel_021583	XLOC_220785	.	-8.94186	0.000230967	0.0123038	down
XM_005679497.3	gene-CNOT4	CNOT4	-9.13296	0.000234584	0.0124888	down
Novel_012674	XLOC_140615	.	8.94251	0.000235869	0.0125495	up
Novel_016639	XLOC_177066	.	-6.83452	0.000237258	0.0126156	down
Novel_004222	XLOC_047560	.	6.89002	0.000238431	0.0126703	up
XM_018045134.1	gene-JAK1	JAK1	1.76525	0.000239542	0.0127215	up
Novel_017137	XLOC_180213	.	-10.9224	0.000240013	0.0127387	down
XR_001919079.1	gene-SYS1	SYS1	1.4328	0.000240735	0.0127692	up
XM_005688969.3	gene-PCMTD1	PCMTD1	-11.1086	0.000241972	0.012827	down
XM_005697588.3	gene-ANKS4B	ANKS4B	-11.1059	0.000242728	0.0128592	down
Novel_004967	XLOC_053409	.	3.65954	0.000250632	0.0132699	up
Novel_015219	XLOC_166306	.	-8.96319	0.000251656	0.013316	down
Novel_006189	XLOC_065690	.	-8.96334	0.00025201	0.0133266	down
Novel_007651	XLOC_083189	.	6.13756	0.000252635	0.0133515	up
XM_005695620.2	gene-CRELD1	CRELD1	-2.15008	0.000253176	0.013372	down
Novel_004650	XLOC_050711	.	2.61606	0.000256135	0.01352	up
XM_005683314.3	gene-CXCL14	CXCL14	-6.11253	0.000257195	0.0135677	down
Novel_002480	XLOC_028804	.	5.72858	0.000257644	0.0135832	up
XM_013962435.2	gene-TARS2	TARS2	3.14115	0.000260831	0.0137429	up
XM_018055762.1	gene-SCAI	SCAI	-9.03573	0.000262704	0.0138247	down
XM_018054207.1	gene-MAPK6	MAPK6	-1.89074	0.000263898	0.0138792	down
XM_018062989.1	gene-LOC102168713	LOC102168713	-1.43793	0.000264848	0.0139207	down
XM_018044556.1	gene-IL3RA	IL3RA	-5.68187	0.000265809	0.0139628	down
Novel_013275	XLOC_147170	.	-8.84368	0.000271723	0.0142562	down
XR_001917886.1	gene-LOC102186356	LOC102186356	-5.95322	0.000272415	0.0142838	down
Novel_013124	XLOC_145629	.	-8.95577	0.000276933	0.014512	down
XM_018051934.1	gene-BNC2	BNC2	10.9975	0.000279189	0.0146214	up
XM_018053277.1	gene-ADGRG6	ADGRG6	-10.9926	0.000280948	0.0147047	down
XM_005683237.3	gene-UBLCP1	UBLCP1	-0.37226	0.000284433	0.0148781	down
XM_013975042.2	gene-CISD1	CISD1	8.76505	0.000292017	0.0152472	up
XM_018058596.1	gene-ST3GAL1	ST3GAL1	5.53968	0.000294451	0.0153651	up
XM_018046275.1	gene-ARHGEF2	ARHGEF2	5.85884	0.000297843	0.0155327	up
Novel_006945	XLOC_074528	.	-4.53223	0.000299347	0.0156018	down
Novel_011311	XLOC_125074	.	-1.05113	0.000303212	0.0157938	down
XM_018064453.1	gene-C19H17orf100	C19H17orf100	6.816	0.000303463	0.0157973	up
XM_018059810.1	gene-FN1	FN1	-2.30838	0.000304813	0.0158581	down
XM_018041853.1	gene-FAT1	FAT1	10.2669	0.000308418	0.0160265	up
Novel_018616	XLOC_195930	.	4.50707	0.00030835	0.0160265	up
XM_018042503.1	gene-AIFM2	AIFM2	-3.72473	0.000309583	0.0160774	down
Novel_007452	XLOC_079379	.	-5.93203	0.000309954	0.0160871	down
XM_018057506.1	gene-RTEL1	RTEL1	-8.84451	0.000311707	0.0161684	down
Novel_010796	XLOC_119774	.	8.82908	0.000312389	0.0161941	up
Novel_021901	XLOC_225226	.	6.68457	0.000313729	0.0162538	up
XM_018040716.1	gene-RNF216	RNF216	1.58605	0.000316767	0.0163917	up
XM_005676389.3	gene-NBEAL1	NBEAL1	-1.63599	0.000317654	0.0164278	down
XM_018048755.1	gene-TMEM184B	TMEM184B	6.01374	0.000319263	0.0165011	up
Novel_000283	XLOC_003532	.	6.29408	0.000320628	0.0165618	up
Novel_017275	XLOC_181256	.	1.56712	0.000322701	0.016659	up
XM_018040732.1	gene-ABCC1	ABCC1	-6.84023	0.000323377	0.016684	down
XM_005700158.3	gene-SYTL4	SYTL4	-1.7218	0.000326715	0.0168462	down
XM_005679467.3	gene-UBE2H	UBE2H	-5.08482	0.000328204	0.0169129	down
XM_018060173.1	gene-MARK1	MARK1	8.85642	0.000329252	0.0169569	up
Novel_007996	XLOC_086949	.	-5.09404	0.000331343	0.0170544	down
XM_013966062.2	gene-INVS	INVS	5.03748	0.000331657	0.0170605	up
XM_018047776.1	gene-LOC102190935	LOC102190935	-5.43845	0.000333773	0.0171389	down
Novel_010357	XLOC_114707	.	6.90754	0.000333654	0.0171389	up
XM_018062690.1	gene-C18H19orf68	C18H19orf68	-6.01195	0.000334558	0.017169	down
XM_018039542.1	gene-CNDP1	CNDP1	-5.76289	0.00033553	0.0172088	down
Novel_008854	XLOC_097582	.	-7.73543	0.000341342	0.0174862	down
XM_018050283.1	gene-SLC4A9	SLC4A9	6.08504	0.000344254	0.0176146	up
Novel_013988	XLOC_154355	.	-7.86713	0.000349977	0.0178771	down
Novel_017845	XLOC_188067	.	10.0816	0.000350003	0.0178771	up
XM_018064339.1	gene-MYO18A	MYO18A	3.8713	0.000351501	0.0179431	up
Novel_001333	XLOC_015775	.	-1.19424	0.000355926	0.0181583	down
Novel_002409	XLOC_028058	.	1.77002	0.000359803	0.0183238	up
Novel_019154	XLOC_200491	.	-7.20375	0.000363357	0.0184831	down
Novel_023977	XLOC_251045	.	5.92345	0.000363153	0.0184831	up
Novel_003008	XLOC_033981	.	-8.61777	0.000365079	0.0185598	down
XM_013973851.2	gene-C23H6orf89	C23H6orf89	-2.02567	0.000365546	0.0185727	down
XM_018058143.1	gene-COL14A1	COL14A1	-5.29356	0.000366089	0.0185894	down
Novel_017204	XLOC_180707	.	-7.79054	0.000367427	0.0186464	down
XM_013968579.2	gene-OSBPL6	OSBPL6	-5.34967	0.000368111	0.0186608	down
Novel_002450	XLOC_028617	.	8.73305	0.00036814	0.0186608	up
NM_001285625.1	gene-LGALS15	LGALS15	-10.3992	0.000369837	0.0187359	down
XM_005697139.3	gene-VAPA	VAPA	-3.73759	0.000372397	0.0188546	down
XM_013976203.2	gene-TMEM164	TMEM164	5.53058	0.000373441	0.0188854	up
Novel_014400	XLOC_157874	.	4.60635	0.000373419	0.0188854	up
XM_013972367.2	gene-GAA	GAA	2.78378	0.000375543	0.0189807	up
Novel_023234	XLOC_241522	.	5.8182	0.000379249	0.0191568	up
Novel_008813	XLOC_097151	.	-8.62189	0.000384092	0.0193902	down
XM_018061983.1	gene-CHD9	CHD9	5.60519	0.000384914	0.0194091	up
Novel_006963	XLOC_075277	.	-2.27456	0.00038478	0.0194091	down
Novel_006512	XLOC_069142	.	-5.29405	0.000385449	0.0194248	down
XM_013974903.2	gene-SLX4	SLX4	5.83414	0.000390697	0.0196664	up
Novel_014277	XLOC_156923	.	2.98097	0.000391284	0.0196846	up
XM_005679498.3	gene-CNOT4	CNOT4	-8.69055	0.000394599	0.0198398	down
XM_005697847.3	gene-ZKSCAN5	ZKSCAN5	-7.69249	0.000399902	0.0200832	down
XM_018061684.1	gene-ST3GAL2	ST3GAL2	-3.8912	0.000407656	0.020449	down
XM_018052670.1	gene-TMEM268	TMEM268	-1.03668	0.000425666	0.0213278	down
XM_018054287.1	gene-FAM81A	FAM81A	-2.32696	0.000428942	0.0214671	down
Novel_002614	XLOC_029456	.	4.57087	0.000430589	0.0215371	up
XM_018039085.1	gene-RCAN2	RCAN2	-8.85206	0.000433176	0.021654	down
XM_018049737.1	gene-CPEB2	CPEB2	-4.24129	0.000435438	0.0217546	down
Novel_013150	XLOC_145766	.	8.61471	0.000439509	0.0219328	up
XM_018053675.1	gene-DMGDH	DMGDH	-5.17836	0.000443097	0.0220991	down
XM_018063037.1	gene-CACNG7	CACNG7	-6.33673	0.000445034	0.022183	down
XM_018040882.1	gene-GTF2IRD1	GTF2IRD1	-8.56124	0.00044539	0.022188	down
XM_018054998.1	gene-RTKN	RTKN	5.38299	0.000446192	0.0222152	up
Novel_018014	XLOC_189506	.	-7.77288	0.000448969	0.0223407	down
Novel_004608	XLOC_050409	.	-7.05509	0.000451783	0.0224678	down
Novel_006193	XLOC_065792	.	-9.39366	0.00045383	0.0225567	down
XM_018050684.1	gene-CEP120	CEP120	1.19772	0.000458288	0.0227652	up
XM_005678434.3	gene-OSBPL9	OSBPL9	2.05634	0.000460102	0.0228423	up
Novel_005916	XLOC_062641	.	4.90571	0.000463411	0.0229934	up
Novel_011177	XLOC_123389	.	5.89763	0.000471679	0.0233903	up
Novel_016037	XLOC_173637	.	-8.48331	0.000482386	0.0238803	down
Novel_013566	XLOC_149924	.	7.00221	0.000482905	0.0238924	up
XM_018050336.1	gene-FAM13B	FAM13B	2.04728	0.000484893	0.0239771	up
XR_001297548.2	gene-KIAA0907	KIAA0907	-3.42159	0.000485581	0.0239974	down
Novel_009237	XLOC_101506	.	8.44126	0.00049814	0.0245761	up
XM_018043941.1	gene-CXHXorf38	CXHXorf38	-0.595519	0.000499382	0.0246234	down
XM_018065871.1	gene-TEX22	TEX22	-8.5778	0.000500182	0.0246488	down
XM_018051781.1	gene-CTSV	CTSV	0.856666	0.000501355	0.0246927	up
Novel_023678	XLOC_248750	.	8.52708	0.000502627	0.0247413	up
XM_018057692.1	gene-TM9SF4	TM9SF4	-6.50169	0.000503006	0.0247459	down
Novel_016140	XLOC_174126	.	8.86445	0.000504579	0.0248092	up
XM_013969187.2	gene-FAM110B	FAM110B	-6.94017	0.000508925	0.0250088	down
XM_018042072.1	gene-LOC100861104	LOC100861104	3.37062	0.000511027	0.0250978	up
Novel_007904	XLOC_085542	.	8.46904	0.000512758	0.0251686	up
XM_018050726.1	gene-LOC102189116	LOC102189116	-3.18448	0.000516067	0.0253167	down
XM_018054479.1	gene-SPRED1	SPRED1	-4.87739	0.000517741	0.0253845	down
XM_018061465.1	gene-ZNF605	ZNF605	-8.15845	0.000518526	0.0254087	down
XM_018056009.1	gene-PRRC2B	PRRC2B	5.63626	0.000519699	0.0254251	up
Novel_018683	XLOC_197388	.	6.93258	0.000519247	0.0254251	up
Novel_021659	XLOC_222125	.	6.14282	0.000519741	0.0254251	up
Novel_019544	XLOC_203685	.	1.32779	0.000522355	0.0255387	up
XM_013976716.2	gene-ARHGEF2	ARHGEF2	2.29495	0.000526601	0.0257183	up
Novel_004215	XLOC_047560	.	8.37225	0.000526622	0.0257183	up
XM_018064673.1	gene-ITGA6	ITGA6	-0.815614	0.000530068	0.025872	down
XM_018064900.1	gene-SAMD14	SAMD14	-6.25553	0.000533282	0.0260143	down
XM_018065057.1	gene-HNRNPA3	HNRNPA3	4.50572	0.000533677	0.0260189	up
XM_018061385.1	gene-NCOR2	NCOR2	6.49921	0.000537079	0.0261701	up
XM_018056279.1	gene-RNASEH2B	RNASEH2B	2.37108	0.000548114	0.0266779	up
Novel_006157	XLOC_065322	.	6.75282	0.00055116	0.0267961	up
Novel_015642	XLOC_170448	.	-8.99619	0.000550883	0.0267961	down
Novel_019905	XLOC_206873	.	7.01898	0.000552361	0.0268394	up
XM_018043183.1	gene-MARK2	MARK2	0.911048	0.000554618	0.026934	up
XM_018044654.1	gene-ZNF275	ZNF275	-0.738247	0.00055493	0.0269341	down
Novel_019945	XLOC_207057	.	8.8684	0.000560223	0.0271758	up
Novel_014270	XLOC_156874	.	9.01982	0.000561098	0.027203	up
XM_018054602.1	gene-EFS	EFS	3.08661	0.000564819	0.0273682	up
XM_018059559.1	gene-LOC102172084	LOC102172084	-10.4302	0.000568235	0.027503	down
Novel_004203	XLOC_047560	.	8.28997	0.000573003	0.0277184	up
XM_005697008.3	gene-MEP1B	MEP1B	-3.61931	0.000576196	0.0278573	down
Novel_009976	XLOC_110339	.	-8.3582	0.000577577	0.0279021	down
XM_018064017.1	gene-LOC106503207	LOC106503207	4.4814	0.000586148	0.0282912	up
Novel_006833	XLOC_071277	.	2.67412	0.000596529	0.0287762	up
XM_018052425.1	gene-NTRK2	NTRK2	6.37419	0.000596955	0.0287808	up
XM_005691031.3	gene-SERTAD4	SERTAD4	4.78821	0.000598737	0.0288507	up
XM_018058442.1	gene-CSPP1	CSPP1	-2.83783	0.000600024	0.0288806	down
Novel_016751	XLOC_177620	.	8.34437	0.000599809	0.0288806	up
XM_018055745.1	gene-DENND1A	DENND1A	-5.11615	0.000602788	0.0289976	down
XM_018046881.1	gene-LOC102172789	LOC102172789	4.62593	0.000604266	0.0290526	up
Novel_015032	XLOC_164233	.	2.233	0.000606878	0.0291621	up
XM_018062407.1	gene-AKT2	AKT2	0.366382	0.000607918	0.0291958	up
XM_018055676.1	gene-TAF1B	TAF1B	8.26988	0.000617558	0.0296424	up
XM_018041874.1	gene-VDAC3	VDAC3	-3.02746	0.000618072	0.0296507	down
XM_018047335.1	gene-CDCA7L	CDCA7L	2.21218	0.000619427	0.0296993	up
XM_018046974.1	gene-POT1	POT1	5.82868	0.000619798	0.0297007	up
XM_018060795.1	gene-LOC102169209	LOC102169209	1.33595	0.000624815	0.0299246	up
XM_018064137.1	gene-YPEL2	YPEL2	5.21942	0.000635854	0.030403	up
Novel_006885	XLOC_071554	.	8.2586	0.000635671	0.030403	up
Novel_019192	XLOC_200687	.	-7.34132	0.000644047	0.030772	down
XM_018041924.1	gene-HGSNAT	HGSNAT	-1.47301	0.000646436	0.030858	down
Novel_013615	XLOC_150380	.	-8.16374	0.000647067	0.0308711	down
XM_018062226.1	gene-IST1	IST1	1.3104	0.000648863	0.0309398	up
Novel_006640	XLOC_070563	.	8.28015	0.000652784	0.0310927	up
XM_018047867.1	gene-ASB8	ASB8	8.31757	0.000655889	0.0312234	up
Novel_022197	XLOC_229986	.	5.44717	0.000662377	0.031515	up
NM_001285748.1	gene-MTOR	MTOR	4.04176	0.00066447	0.0315973	up
NM_001285643.1	gene-SDF4	SDF4	-3.85326	0.000672943	0.0319827	down
Novel_016873	XLOC_178468	.	-8.36161	0.000674496	0.0320214	down
XM_018043619.1	gene-AKR1A1	AKR1A1	-2.48408	0.000676542	0.032101	down
XM_018064274.1	gene-LOC102189340	LOC102189340	8.1595	0.000677525	0.0321301	up
XM_018050482.1	gene-TMEM259	TMEM259	2.89562	0.000680353	0.0322466	up
XM_018058228.1	gene-CDH17	CDH17	-5.90535	0.000685761	0.0324674	down
XM_018041300.1	gene-MMS19	MMS19	3.40402	0.00068556	0.0324674	up
XM_018046130.1	gene-TFRC	TFRC	-1.09829	0.000692846	0.032785	down
Novel_003237	XLOC_036065	.	7.7247	0.00070394	0.0332737	up
Novel_015477	XLOC_169606	.	-1.97538	0.000704888	0.0333004	down
Novel_017078	XLOC_179779	.	9.18223	0.000708037	0.033431	up
Novel_000835	XLOC_010692	.	4.97092	0.000709806	0.0334781	up
XM_005679119.3	gene-RINT1	RINT1	1.04918	0.000714193	0.0336667	up
Novel_018103	XLOC_190081	.	4.26175	0.000714939	0.0336836	up
XM_013965331.2	gene-LOC102189116	LOC102189116	-3.20914	0.000718562	0.0338176	down
Novel_015009	XLOC_164123	.	1.06974	0.000720019	0.0338678	up
XM_018049776.1	gene-AFAP1	AFAP1	5.90878	0.000729294	0.0342855	up
XM_018041355.1	gene-SGMS1	SGMS1	-4.38042	0.000733886	0.0344827	down
Novel_004458	XLOC_049355	.	6.48536	0.000739192	0.0347133	up
Novel_013542	XLOC_149822	.	-7.04342	0.000740664	0.0347636	down
Novel_024251	XLOC_254374	.	2.01605	0.000748189	0.0350978	up
XM_005677837.3	gene-CSDE1	CSDE1	-7.56808	0.000750353	0.0351803	down
Novel_002303	XLOC_026459	.	-8.15716	0.000751373	0.0352091	down
XM_018039714.1	gene-CXXC1	CXXC1	-1.68692	0.00075789	0.0354954	down
XM_018048326.1	gene-FGD4	FGD4	-4.35946	0.000759736	0.0355626	down
XM_018046358.1	gene-CFAP45	CFAP45	4.99912	0.000765286	0.0358031	up
XM_018045678.1	gene-SSX2IP	SSX2IP	-2.64221	0.000769231	0.0359683	down
Novel_016755	XLOC_177620	.	8.15861	0.000774875	0.0362127	up
Novel_004617	XLOC_050545	.	3.25012	0.000780672	0.036464	up
XM_005685299.3	gene-DMGDH	DMGDH	1.70061	0.000793797	0.0370191	up
XM_013964130.2	gene-ABCC5	ABCC5	-6.47055	0.000794591	0.0370344	down
XM_018038672.1	gene-DST	DST	-4.03469	0.000795661	0.0370644	down
XM_018040891.1	gene-SH3BP4	SH3BP4	-6.79994	0.000799108	0.037205	down
XM_018042371.1	gene-CAMK2G	CAMK2G	8.16508	0.000802236	0.0373106	up
XM_005684878.3	gene-SF3B5	SF3B5	-3.79632	0.000801955	0.0373106	down
XM_005689361.3	gene-MMP1	MMP1	-9.6865	0.000808054	0.037541	down
XM_018067168.1	gene-TMCC1	TMCC1	1.40429	0.000819221	0.0380394	up
Novel_015388	XLOC_169098	.	-8.36439	0.000820554	0.038081	down
XM_018052993.1	gene-PKIB	PKIB	6.11193	0.000822054	0.0381302	up
Novel_018349	XLOC_193046	.	-2.23889	0.000823997	0.0381999	down
XM_018066715.1	gene-PBRM1	PBRM1	-4.82782	0.000827567	0.0383428	down
XM_018067087.1	gene-PDZRN3	PDZRN3	-4.08801	0.000827961	0.0383428	down
XM_013967692.2	gene-RBM11	RBM11	-4.01109	0.000840179	0.0388879	down
XM_018059237.1	gene-TRIM44	TRIM44	8.31475	0.000840653	0.038889	up
Novel_012380	XLOC_136475	.	-5.57672	0.000861035	0.0397684	down
XM_018057901.1	gene-TTPAL	TTPAL	-5.06713	0.000863868	0.039878	down
XM_018066025.1	gene-TECPR2	TECPR2	6.09899	0.000868253	0.0400591	up
Novel_023936	XLOC_250678	.	-4.28374	0.000871953	0.0402085	down
XM_018047789.1	gene-ATF1	ATF1	4.83639	0.000872584	0.0402162	up
XM_018047934.1	gene-KIF21A	KIF21A	-8.74144	0.000873984	0.040238	down
Novel_016658	XLOC_177139	.	-10.0672	0.00087487	0.0402575	down
Novel_013229	XLOC_146654	.	8.16646	0.000879316	0.0404406	up
Novel_015470	XLOC_169564	.	7.19267	0.000880509	0.040474	up
NM_001314221.1	gene-CIDEA	CIDEA	-3.69337	0.000882012	0.0405217	down
Novel_017219	XLOC_180784	.	2.72646	0.000885624	0.0406661	up
Novel_015135	XLOC_165465	.	4.70371	0.000886632	0.0406909	up
XM_018055792.1	gene-RALGPS1	RALGPS1	-7.98887	0.000887148	0.040693	down
XM_005700578.2	gene-ZNF711	ZNF711	-1.15133	0.000888631	0.0407396	down
Novel_014905	XLOC_163237	.	-9.3671	0.000901437	0.0412831	down
XM_018041825.1	gene-RNF170	RNF170	3.17915	0.000903124	0.0413385	up
Novel_004544	XLOC_050056	.	1.1858	0.00091181	0.0417141	up
XM_018039214.1	gene-ADGRF2	ADGRF2	7.20847	0.000917221	0.0419395	up
Novel_008408	XLOC_091155	.	8.00615	0.000927543	0.0423892	up
Novel_020043	XLOC_208247	.	4.36888	0.000938811	0.0428816	up
XM_005700249.3	gene-CAPN6	CAPN6	1.3679	0.000958329	0.0437501	up
XM_005680579.2	gene-MTERF2	MTERF2	-0.714289	0.000962309	0.0439087	down
XM_018058222.1	gene-PDP1	PDP1	-8.07741	0.000964777	0.0439982	down
XM_005685490.3	gene-RAD51	RAD51	-6.17251	0.00097235	0.0443203	down
XM_005680780.3	gene-ABCC9	ABCC9	4.71154	0.000976055	0.0444658	up
Novel_005631	XLOC_059765	.	-3.82471	0.000977745	0.0444961	down
Novel_006269	XLOC_066481	.	7.37807	0.000977546	0.0444961	up
XM_018053004.1	gene-GJA1	GJA1	-3.32359	0.00100381	0.0456585	down
XM_018059188.1	gene-PHF21A	PHF21A	-7.18296	0.00100664	0.0457633	down
Novel_009734	XLOC_107032	.	1.26224	0.0010081	0.0458056	up
XM_018049228.1	gene-MCUB	MCUB	-6.38681	0.00100972	0.045855	down
Novel_020430	XLOC_211987	.	-0.834821	0.00101254	0.0459594	down
XM_018063668.1	gene-CANT1	CANT1	-5.39113	0.00101311	0.0459611	down
XM_018057638.1	gene-NSFL1C	NSFL1C	-3.83446	0.00101459	0.0460043	down
Novel_014007	XLOC_154445	.	-7.86484	0.0010157	0.0460306	down
Novel_014569	XLOC_159518	.	-7.44523	0.00102863	0.0465676	down
XM_018055256.1	gene-CLHC1	CLHC1	-2.5477	0.00103467	0.0468166	down
Novel_023609	XLOC_248066	.	1.57458	0.00103576	0.0468418	up
XR_001918993.1	gene-MLLT10	MLLT10	-1.80118	0.0010384	0.0469365	down
XM_005700785.3	gene-RBM3	RBM3	-4.56006	0.00104364	0.0471269	down
XM_005688773.3	gene-ZNF7	ZNF7	1.74299	0.00104369	0.0471269	up
XM_018048483.1	gene-TIAM1	TIAM1	-2.79733	0.00104926	0.0473536	down
XR_001297541.1	gene-PIGA	PIGA	-1.43574	0.00105095	0.0474054	down
Novel_007847	XLOC_085124	.	8.11417	0.00106474	0.0480025	up
Novel_016659	XLOC_177139	.	-4.71181	0.00106816	0.0481315	down
Novel_007116	XLOC_076542	.	6.29236	0.00106926	0.0481561	up
Novel_016021	XLOC_173557	.	-8.17394	0.00107502	0.0483903	down
Novel_012544	XLOC_139290	.	-8.09622	0.00107743	0.0484737	down
XM_005678341.3	gene-LOC102190840	LOC102190840	1.34302	0.00107982	0.0485559	up
Novel_021799	XLOC_223962	.	6.5776	0.00108115	0.0485906	up
XM_018053258.1	gene-ARFGEF3	ARFGEF3	-0.242817	0.00108417	0.0487011	down
XM_018045468.1	gene-FAM162A	FAM162A	-2.70507	0.00108883	0.0488854	down
XM_018066604.1	gene-GABRA5	GABRA5	6.17314	0.00109413	0.0490978	up
XM_018038616.1	gene-LOC102180547	LOC102180547	4.79059	0.00109671	0.0491883	up
XM_018066725.1	gene-NBEAL2	NBEAL2	-6.73966	0.00110644	0.0495992	down
XM_005693141.3	gene-BCAS3	BCAS3	-5.65094	0.00111517	0.0499644	down

## Sheet: Table S8
Table S8. Differentially expressed mRNAs of Small Tailed Han sheep ovaries at luteal phase.
Gene	GeneName	Log2FoldChange	pvalue	qvalue	Up/Down
ENSOARG00000018127	DNAJC27	1.95432	5.14e-17	2.75e-13	up
ENSOARG00000014523	PCDH10	1.89194	3.88e-15	1.32e-11	up
ENSOARG00000016098	OVAR-DRB3	-4.8807	9.43e-15	2.94e-11	down
ENSOARG00000001169	ENSOARG00000001169	Inf	1.27e-13	3.28e-10	up
ENSOARG00000004595	OXT	-1.73995	1.41e-12	2.63e-09	down
ENSOARG00000013897	TNN	-3.66015	2.55e-12	4.55e-09	down
ENSOARG00000006889	ENSOARG00000006889	3.14488	2.51e-11	3.61e-08	up
ENSOARG00000006446	CDHR5	-1.77167	4.13e-11	5.72e-08	down
ENSOARG00000003936	CALB2	-1.50359	4.99e-11	6.67e-08	down
ENSOARG00000002851	CYP4B1	-4.80461	1.19e-10	1.48e-07	down
ENSOARG00000013070	C1orf115	-1.37567	4.65e-09	4.57e-06	down
ENSOARG00000012071	ENSOARG00000012071	-4.61677	2.55e-08	2.03e-05	down
ENSOARG00000002463	LXN	-0.998974	6.95e-08	4.72e-05	down
ENSOARG00000011009	ENSOARG00000011009	1.23908	1.22e-07	7.49e-05	up
ENSOARG00000013019	TRH	-3.03018	1.67e-07	9.45e-05	down
ENSOARG00000017031	ENSOARG00000017031	-2.38597	2.16e-07	0.000117358	down
ENSOARG00000009483	ENSOARG00000009483	-1.86612	7.49e-07	0.000341531	down
ENSOARG00000020712	ERP27	-0.999624	1.3e-06	0.000560229	down
ENSOARG00000016780	BTNL2	-5.55983	1.78e-06	0.000709574	down
ENSOARG00000001548	CRYBB1	-1.77884	1.84e-06	0.000716212	down
ENSOARG00000010688	TFF2	-1.64625	1.84e-06	0.000716212	down
ENSOARG00000015470	ENSOARG00000015470	#NAME?	2.49e-06	0.000881338	down
ENSOARG00000012712	CDH9	4.54305	2.7e-06	0.000909954	up
ENSOARG00000006201	ENSOARG00000006201	1.11408	3.36e-06	0.00109869	up
ENSOARG00000002996	ATP6V0D1	-0.90317	3.77e-06	0.00118578	down
ENSOARG00000007547	ENSOARG00000007547	-0.882114	3.71e-06	0.00118578	down
ENSOARG00000013334	NOL7	-1.02933	3.76e-06	0.00118578	down
ENSOARG00000009887	CHST15	-0.835041	5.55e-06	0.00157332	down
ENSOARG00000019913	ENSOARG00000019913	-2.53125	5.81e-06	0.00163412	down
ENSOARG00000009137	PRL	0.782954	9.72e-06	0.00248386	up
ENSOARG00000011023	ENSOARG00000011023	3.73681	9.87e-06	0.00248386	up
ENSOARG00000015856	IGF1	0.940159	1.3e-05	0.00313397	up
ENSOARG00000011375	ENSOARG00000011375	-1.66437	1.45e-05	0.00335776	down
ENSOARG00000010057	LRP1B	1.08	1.49e-05	0.00338913	up
ENSOARG00000001219	TXLNB	-3.01539	1.57e-05	0.00353463	down
ENSOARG00000004655	KIF26B	1.31159	2.63e-05	0.00508523	up
ENSOARG00000001067	ENSOARG00000001067	Inf	2.88e-05	0.00547339	up
ENSOARG00000000035	CYTB	0.724326	2.99e-05	0.00554224	up
ENSOARG00000008351	SLCO2A1	-0.866406	4.8e-05	0.00813233	down
ENSOARG00000013288	PKHD1	-1.29774	5.72e-05	0.00913889	down
ENSOARG00000007175	ENSOARG00000007175	-1.07025	6.44e-05	0.0101207	down
ENSOARG00000004809	ENSOARG00000004809	-3.17198	6.47e-05	0.0101242	down
ENSOARG00000002269	IRF2BPL	-1.02723	7.07e-05	0.0107965	down
ENSOARG00000014253	SLC7A11	0.851913	8.09e-05	0.0121542	up
ENSOARG00000024494	MALAT1	0.686037	8.5e-05	0.0126129	up
ENSOARG00000014828	SLITRK3	3.32061	8.82e-05	0.0128453	up
ENSOARG00000005495	UQCRB	-0.76821	9.15e-05	0.0132138	down
ENSOARG00000016415	CDO1	-0.774778	0.000104637	0.0143922	down
ENSOARG00000014839	ENSOARG00000014839	-2.93376	0.000140401	0.0180686	down
ENSOARG00000025177	ENSOARG00000025177	-0.754113	0.000140814	0.0180686	down
ENSOARG00000014525	AR	0.64454	0.000143904	0.018312	up
ENSOARG00000007405	C4BPA	-1.27729	0.000145098	0.0184013	down
ENSOARG00000012954	CA2	-0.935978	0.000166124	0.0200758	down
ENSOARG00000018988	KCNK3	-1.90793	0.000166536	0.0200758	down
ENSOARG00000019443	ENSOARG00000019443	-1.16085	0.000168196	0.0200758	down
ENSOARG00000017789	ENSOARG00000017789	-1.13518	0.000185777	0.0217197	down
ENSOARG00000016825	ADAMTS19	1.83095	0.000191625	0.0222643	up
ENSOARG00000013386	ADM5	-1.11913	0.000201818	0.0233038	down
ENSOARG00000019103	SLC32A1	-4.34032	0.000231296	0.0256692	down
ENSOARG00000015298	GRHL1	-1.02035	0.000252261	0.0270418	down
ENSOARG00000019083	KIAA1324	-0.667239	0.00025826	0.0274489	down
ENSOARG00000000078	KIT	-1.04801	0.000262658	0.027671	down
ENSOARG00000017442	HNRNPA3	0.754033	0.000263308	0.027671	up
ENSOARG00000011822	ENSOARG00000011822	0.735967	0.000281678	0.0291915	up
ENSOARG00000011582	CYP26B1	-1.9463	0.000292466	0.029742	down
ENSOARG00000006857	SVEP1	0.603257	0.000296719	0.0299215	up
ENSOARG00000009830	KMT2A	0.660129	0.000299548	0.0301255	up
ENSOARG00000010736	DFNA5	0.660892	0.000311169	0.0308275	up
ENSOARG00000006557	AKAP6	0.887246	0.000321952	0.0313009	up
ENSOARG00000017584	ENSOARG00000017584	-1.22006	0.000319721	0.0313009	down
ENSOARG00000000392	GPRIN3	-0.708907	0.000328216	0.0317293	down
ENSOARG00000002874	ENSOARG00000002874	1.22869	0.000340124	0.0323111	up
ENSOARG00000018684	APIP	-0.738359	0.000358862	0.0336485	down
ENSOARG00000020398	HAO2	-1.31943	0.000360475	0.0337153	down
ENSOARG00000005372	ENSOARG00000005372	-0.779833	0.000399666	0.0360273	down
ENSOARG00000007977	C1QB	-0.838055	0.000398268	0.0360273	down
ENSOARG00000014461	COL24A1	0.875482	0.000399465	0.0360273	up
ENSOARG00000020515	LYZ	-1.34061	0.000402736	0.0361322	down
ENSOARG00000000908	ENSOARG00000000908	2.92145	0.000406388	0.0362859	up
ENSOARG00000006788	IL22RA1	-4.37157	0.000408595	0.0363097	down
ENSOARG00000008891	NTRK2	0.652323	0.000407781	0.0363097	up
ENSOARG00000000032	ND5	0.717729	0.000413966	0.0366523	up
ENSOARG00000008119	FST	0.721323	0.000427149	0.0371639	up
ENSOARG00000023607	SNORA71	1.50637	0.000429373	0.0372707	up
ENSOARG00000003599	ENSOARG00000003599	-1.00788	0.000436295	0.0376616	down
ENSOARG00000020799	ECEL1	-1.57154	0.000439997	0.0378418	down
ENSOARG00000004007	LIPG	2.03729	0.000475224	0.0397742	up
ENSOARG00000013238	SLC39A8	-0.835661	0.000474734	0.0397742	down
ENSOARG00000002559	ENSOARG00000002559	-2.78315	0.00048324	0.0401755	down
ENSOARG00000017926	ERAP2	-0.720068	0.000501451	0.0410733	down
ENSOARG00000006184	COL21A1	-0.886592	0.000556839	0.0440433	down
ENSOARG00000000317	LOX	0.754915	0.000560733	0.0442577	up
ENSOARG00000016502	ADGRV1	1.12882	0.000582286	0.0454549	up
ENSOARG00000005586	PHYH	-0.718238	0.000596137	0.0460606	down
ENSOARG00000000895	ENSOARG00000000895	-2.36272	0.00060462	0.046336	down
ENSOARG00000009377	ENSOARG00000009377	-2.42531	0.00060789	0.046336	down
ENSOARG00000016806	ASPA	0.981394	0.000603376	0.046336	up
ENSOARG00000018402	PRKCSH	-0.647178	0.000611702	0.0464087	down
ENSOARG00000009912	PCP4	2.28033	0.000637623	0.0475195	up
ENSOARG00000002744	ENSOARG00000002744	-1.30756	0.000651412	0.0480226	down
ENSOARG00000003513	MDK	-1.2575	0.000648888	0.0480226	down
ENSOARG00000009552	ENSOARG00000009552	-1.97387	0.000654376	0.0480226	down
ENSOARG00000009804	ACBD4	-1.00951	0.000654644	0.0480226	down
ENSOARG00000011763	ENSOARG00000011763	-0.667158	0.00066302	0.0483526	down

## Sheet: Table S9
Table S9. Differentially expressed mRNAs of Small Tailed Han sheep ovaries at follicular phase.
Gene	GeneName	Log2FoldChange	pvalue	qvalue	Up/Down
ENSOARG00000000033	ND6	-3.68472	3.53e-37	4.39e-33	down
ENSOARG00000019994	ENSOARG00000019994	-3.36267	4.72e-25	3.53e-21	down
ENSOARG00000009019	TNFAIP6	-2.82578	1.13e-17	4.75e-14	down
ENSOARG00000001165	ENSOARG00000001165	3.97069	1.21e-10	2.66e-07	up
ENSOARG00000020977	ENSOARG00000020977	3.6487	3.73e-10	7.73e-07	up
ENSOARG00000000908	ENSOARG00000000908	6.71109	1.59e-09	2.96e-06	up
ENSOARG00000010283	MX1	-1.67228	3.56e-09	6.34e-06	down
ENSOARG00000000022	ATP6	-3.78141	4.37e-09	7.41e-06	down
ENSOARG00000009006	NSRP1	-1.60983	4.93e-09	8e-06	down
ENSOARG00000022075	Hammerhead_HH10	-5.35682	1.33e-08	2.07e-05	down
ENSOARG00000011234	MFAP1	-1.52542	1.71e-08	2.55e-05	down
ENSOARG00000003331	LUC7L3	-1.64816	2.78e-08	4e-05	down
ENSOARG00000014971	ENSOARG00000014971	-2.34583	3.37e-08	4.66e-05	down
ENSOARG00000010231	MX2	-2.15264	1.28e-07	0.000165314	down
ENSOARG00000016098	OVAR-DRB3	-3.46864	1.48e-07	0.000183633	down
ENSOARG00000008072	ENSOARG00000008072	-1.73763	3.3e-07	0.00036283	down
ENSOARG00000015177	IFIT1	-1.3353	5.48e-07	0.000584343	down
ENSOARG00000014244	CCR3	-3.46849	1.59e-06	0.00164914	down
ENSOARG00000008616	PNN	-1.21297	2.16e-06	0.00217936	down
ENSOARG00000000606	ENSOARG00000000606	-1.57199	3.68e-06	0.00352793	down
ENSOARG00000007233	ISG15	-2.10299	3.81e-06	0.00356053	down
ENSOARG00000014648	RSAD2	-2.36745	5.21e-06	0.00462958	down
ENSOARG00000011154	ENSOARG00000011154	-1.41271	6.18e-06	0.00536254	down
ENSOARG00000015414	ENSOARG00000015414	-1.9109	6.47e-06	0.00549077	down
ENSOARG00000018899	PRPF38B	-1.2325	8e-06	0.00663433	down
ENSOARG00000005495	UQCRB	-1.20431	1.04e-05	0.00823707	down
ENSOARG00000009551	FYB1	-1.47937	1.09e-05	0.00848807	down
ENSOARG00000000291	FGB	-1.86014	1.14e-05	0.00869949	down
ENSOARG00000002024	ENSOARG00000002024	-1.71971	2.2e-05	0.0151896	down
ENSOARG00000004981	HNRNPH3	-1.69197	2.42e-05	0.0163722	down
ENSOARG00000019971	PLN	-1.11721	2.71e-05	0.0169609	down
ENSOARG00000024257	ENSOARG00000024257	-3.19569	2.59e-05	0.0169609	down
ENSOARG00000014715	ZNF134	-4.23339	2.85e-05	0.0174265	down
ENSOARG00000003174	PPIG	-1.10439	2.98e-05	0.0176586	down
ENSOARG00000011916	ENSOARG00000011916	-1.07394	6.27e-05	0.0339454	down
ENSOARG00000000472	SEC62	-1.03988	7.16e-05	0.0376314	down
ENSOARG00000000032	ND5	-2.52427	8.84e-05	0.0434352	down
ENSOARG00000002725	ENSOARG00000002725	-1.44145	8.77e-05	0.0434352	down
ENSOARG00000020709	ENSOARG00000020709	-1.02337	9.68e-05	0.0457336	down

## Sheet: Table S10
Table S10. Functional category of positively selected genes in Yunshang black goats.
GroupID	Category	Term	Description	lgP	lg(q-value)	Symbols
4_Summary	GO Biological Processes	GO:0045055	Regulated exocytosis	-5.03084	-1.38355	A1BG,AP2A2,APRT,CHRNA5,FCGR2A,FCGR2B,FCGR3B,GALNS,GM2A,GRIK5,HCK,HSPA6,MMP9,PSMB1,SYT1,TLR2,ZP3,SYNGR1,WDR1,MMRN1,RAB4B,CD177,CHID1,APOOL,DLL1
5_Summary	GO Biological Processes	GO:1990349	Gap junction-mediated intercellular transport	-4.59361	-1.24645	GJA3,GJB2,GJB6,SRC,SRI
7_Summary	GO Biological Processes	GO:0007340	Acrosome reaction	-4.07962	-1.11357	ADCY3,ZP2,ZP3,POMZP3,PRND,TEX101,IBSP,MMRN1,PCOLCE2,NTN4,THSD4,HOXA11
8_Summary	GO Biological Processes	GO:0016358	Dendrite development	-4.01012	-1.07151	ARF4,RERE,CAMK2B,CUX1,GSK3A,PRKG1,HECW1,TANC2,SLC12A5,ARID1B,HECW2,MEGF8,EPHA3,FCGR2B,GRID2,PRNP,SRC,SYT1,SEMA7A,CDC42EP3,SDCCAG8,AUTS2,HCK,PRKDC,WDR1,NUMBL,LHX2,NTN4
9_Summary	GO Biological Processes	GO:0007420	Brain development	-3.94065	-1.07151	ARF4,RERE,FCGR2B,GRID2,HNMT,MNAT1,PAFAH1B3,PRKDC,PRKG1,SCTR,SRC,SYT1,SEMA7A,NUMBL,LHX2,CIC,ADGRL2,DLL1,NSUN5,COQ8B,DIXDC1
12_Summary	GO Biological Processes	GO:0099175	Regulation of postsynapse organization	-2.9263	-0.487921	ARF4,CAMK2B,FCGR2B,GRID2,PRNP,TANC2,LRRC4,SLC12A5,ARID1B
14_Summary	GO Biological Processes	GO:0000959	Mitochondrial RNA metabolic process	-2.79298	-0.424451	PRORP,TRMT5,METTL4,EARS2,POU2F2,PRKDC,TBP,ZNF143,FKBP6,SND1,TRMT13,THUMPD1,NSUN5,DEDD2,TSEN54,GSK3A,HNMT,AUTS2,PHF19,NDUFAF7,POM121
15_Summary	GO Biological Processes	GO:0010638	Positive regulation of organelle organization	-2.69052	-0.379561	CCT6A,GSK3A,HCK,MMP9,SRC,SYT1,YWHAG,TNKS,WDR1,CDC42EP3,AUTS2,PHF19,VPS13C,SLAIN2,CDT1,CEP295
16_Summary	GO Biological Processes	GO:0035088	Establishment or maintenance of apical/basal cell polarity	-2.65825	-0.379561	ARF4,LHX2,WDR1,OOEP
17_Summary	GO Biological Processes	GO:0021695	Cerebellar cortex development	-2.65825	-0.379561	RERE,GRID2,DLL1,COQ8B,FCGR2B,POU2F2
11_Summary	KEGG Pathway	hsa01522	Endocrine resistance	-3.17274	-0.618877	ADCY3,MMP9,MAPK10,SRC,AKT3,DLL1,HSPA6,HSP90B1,AP2A2,EPHA3,GNG5,DUSP12,BIRC3

## Sheet: Table S11
Table S11. Terms related to acrosome reaction and endocrine resistance.
Summary	Term	Describe	-lg(p)	Gene
Acrosome reaction	GO:0007339	Binding of sperm to zona pellucida	2.9	ZP2, ZP3, POMZP3, TEX101
	GO:0060046	Regulation of acrosome reaction	2.89	ZP2, ZP3, POMZP3
	GO:0007338	Single fertilization	2.65	ADCY3, HOXA11, ZP2, ZP3, POMZP3, PRND, TEX101
	GO:0080154	Regulation of fertilization	2.37	ZP2, ZP3, POMZP3
	GO:0035036	Sperm-egg recognition	2.37	ZP2, ZP3, POMZP3, TEX101
	GO:0009566	Fertilization	2.2	ADCY3, HOXA11, ZP2, ZP3, POMZP3, PRND, TEX101
Endocrine resistance	ko01522	Endocrine resistance	3.17	ADCY3, MMP9, MAPK10, SRC, AKT3, DLL1
	ko04915	Estrogen signaling pathway	3.13	ADCY3, HSPA6, MMP9, SRC, HSP90B1, AKT3
	hsa04926	Relaxin signaling pathway	2.4	ADCY3, GNG5, MMP9, MAPK10, SRC, AKT3
	hsa04915	Estrogen signaling pathway	2.25	ADCY3, HSPA6, MMP9, SRC, HSP90B1, AKT3
	hsa05418	Fluid shear stress and atherosclerosis	2.22	MMP9, MAPK10, SRC, HSP90B1, AKT3, DUSP12
